# Supplementary material for: RNA-seq coupling two different methods of castration reveals new insights into androgen deficiency-caused degeneration of submaxillary gland in male Sprague Dawley rats
Source: BMC Genomics. 2022 Apr 7;23:279. doi: 10.1186/s12864-022-08521-9 (PMC8991617; doi:10.1186/s12864-022-08521-9)
Supplement: Supplementary file 2 — Additional file 2. DEGs betweentreatment groups and mDEGs. [file 12864_2022_8521_MOESM2_ESM.xlsx]

## Sheet: DEGs_ORC Vs EM
gene_id	gene_name	ORC1	ORC2	ORC3	EM1	EM2	EM3	ORC	EM	FC	log2FoldChange	pvalue	padj
ENSRNOG00000049394	LOC679739	323.486	308.06	437.867	7.22975	1.01904	0.983402	356.471	3.0774	117.366	6.87488	3.41346e-39	1.69433e-35
ENSRNOG00000040005	Ndufa1	0.977298	334.977	249.933	3.09846	1.01904	3.93361	195.296	2.6837	72.7105	6.18409	0.000257286	0.00982369
ENSRNOG00000002462	LOC100911746	0.977298	0.996956	38.7493	0	0	0.983402	13.5745	0.327801	37.4841	5.22821	0.00226647	0.0494144
ENSRNOG00000011542	Apopt1	44.9557	3.98783	0.968732	0	2.03808	0	16.6374	0.67936	24.6085	4.62108	0.00230219	0.049901
ENSRNOG00000060344	AABR07073045.1	34.2054	3.98783	127.873	4.13129	2.03808	1.9668	55.3553	2.71206	20.444	4.35361	0.00094547	0.0264146
ENSRNOG00000005247	LOC100912008	5.86379	80.7535	115.279	4.13129	2.03808	6.88382	67.2988	4.35106	15.4442	3.94899	0.000758198	0.022225
ENSRNOG00000029792	Ogn	146.595	201.385	6.78112	5.16411	12.2285	8.85062	118.254	8.74774	13.5143	3.75642	0.0014985	0.0369439
ENSRNOG00000007320	Fam3d	1636	1513.38	1109.2	159.055	94.7707	81.6224	1419.52	111.816	12.7117	3.66808	7.22834e-71	1.07637e-66
ENSRNOG00000061786	Rn60_18_0774.1	23.4551	23.927	16.4684	4.13129	0	0.983402	21.2835	1.7049	12.5781	3.65284	6.8731e-05	0.0034694
ENSRNOG00000022784	AABR07036035.1	94.7979	69.7869	55.2177	3.09846	12.2285	5.90041	73.2675	7.07579	10.3509	3.37169	1.22849e-11	5.71671e-09
ENSRNOG00000048017	Igkv5-37	5.86379	12.9604	52.3115	0	2.03808	4.91701	23.7119	2.31836	10.1467	3.34294	0.000729264	0.0214191
ENSRNOG00000016262	Dnase2b	148.549	290.114	143.372	4.13129	32.6093	22.6183	194.012	19.7863	9.79911	3.29265	2.24915e-05	0.00136703
ENSRNOG00000001756	LOC100911374	3.90919	31.9026	20.3434	2.06564	2.03808	1.9668	18.7184	2.02351	9.24784	3.20912	0.000910504	0.025845
ENSRNOG00000027240	Kndc1	41.0465	8.97261	24.2183	2.06564	1.01904	4.91701	24.7458	2.66723	9.22613	3.20573	0.000152249	0.00655243
ENSRNOG00000018476	Fuom	6.84108	6.97869	101.717	5.16411	3.05712	5.90041	38.5122	4.70721	8.17924	3.03197	0.000723166	0.0212909
ENSRNOG00000010467	Cpa5	27.3643	12.9604	8.71859	1.03282	2.03808	2.95021	16.3478	2.00704	8.10834	3.01941	0.00128579	0.0333738
ENSRNOG00000009399	RGD1311224	59.6152	119.635	96.8732	5.16411	17.3237	12.7842	92.041	11.7573	7.81351	2.96597	1.82016e-11	7.52889e-09
ENSRNOG00000047565	LOC100911186	107.503	7.97565	14.531	4.13129	5.0952	8.85062	43.3365	6.0257	7.178	2.84358	0.000444796	0.015044
ENSRNOG00000014152	Kcnip3	70.3654	111.659	113.342	3.09846	18.3427	22.6183	98.4554	14.6865	6.67757	2.73932	1.1496e-09	3.05691e-07
ENSRNOG00000042717	Ciart	28.3416	22.93	8.71859	4.13129	3.05712	1.9668	19.9967	3.05174	6.5705	2.716	0.000858049	0.0246189
ENSRNOG00000053633	Rnase1	142.685	102.687	66.8425	11.361	19.3618	20.6514	104.071	17.1247	6.06622	2.6008	3.49277e-11	1.26856e-08
ENSRNOG00000057072	Slc12a3	22.4778	33.8965	34.8743	2.06564	3.05712	9.83402	30.4162	4.9856	6.0573	2.59868	8.50564e-05	0.00413913
ENSRNOG00000046950	LOC100912481	10.7503	74.7717	97.8419	14.4595	9.17136	13.7676	61.1213	12.4662	4.90238	2.29348	0.000174825	0.00717168
ENSRNOG00000018445	Agt	61.5698	158.516	182.122	14.4595	20.3808	47.2033	134.069	27.3479	4.88969	2.28974	1.68452e-07	2.12578e-05
ENSRNOG00000014481	Adtrp	105.548	310.053	224.746	39.2472	21.3998	85.556	213.449	48.7344	4.37712	2.12998	0.0019404	0.0445215
ENSRNOG00000030807	LOC100912427	629.38	621.104	211.184	96.0524	81.5232	160.295	487.222	112.623	4.32502	2.11271	0.000153091	0.00656966
ENSRNOG00000037673	RGD1565183	44.9557	139.574	73.6236	20.6564	18.3427	21.6349	86.0511	20.2113	4.25461	2.08903	1.29697e-06	0.000124602
ENSRNOG00000005810	Nlrc4	152.458	147.55	105.592	25.8205	39.7426	32.4523	135.2	32.6718	4.13594	2.04821	5.56172e-12	2.76065e-09
ENSRNOG00000001360	Stag3	32.2508	61.8113	33.9056	11.361	5.0952	16.7178	42.6559	11.058	3.84682	1.94367	0.000256705	0.00982369
ENSRNOG00000013428	Atp6v0a4	294.167	105.677	281.901	50.6083	73.3709	60.9709	227.248	61.65	3.68656	1.88227	9.96573e-09	1.95263e-06
ENSRNOG00000015201	RGD1562084	75.2519	73.7748	45.5304	17.558	13.2475	22.6183	64.8524	17.8079	3.63595	1.86233	4.5451e-06	0.000367832
ENSRNOG00000049575	LOC100911672	74.2746	70.7839	31.9681	19.6236	8.15232	21.6349	59.0089	16.4703	3.57825	1.83925	0.000109143	0.00511085
ENSRNOG00000027742	Adamtsl2	65.4789	90.723	92.0295	17.558	23.4379	29.5021	82.7438	23.4993	3.51498	1.81352	2.82288e-07	3.41752e-05
ENSRNOG00000014940	Sfrp5	138.776	161.507	180.184	41.3129	26.495	68.8382	160.156	45.5487	3.50967	1.81133	4.0019e-09	9.12753e-07
ENSRNOG00000045738	Ak4	34.2054	25.9209	38.7493	7.22975	8.15232	12.7842	32.9585	9.38877	3.50338	1.80875	0.000663474	0.0202041
ENSRNOG00000050647	Hspa1b	112.389	249.239	137.56	58.8708	51.971	34.4191	166.396	48.4203	3.43911	1.78204	4.902e-08	7.46612e-06
ENSRNOG00000007335	Ccl11	74.2746	98.6987	75.5611	8.26257	21.3998	45.2365	82.8448	24.9663	3.30714	1.72558	0.000110865	0.00515901
ENSRNOG00000000007	Gad1	318.599	197.397	212.152	39.2472	70.3137	117.025	242.716	75.5286	3.20882	1.68204	7.90534e-08	1.12497e-05
ENSRNOG00000021355	Car6	444294	475925	382052	137039	143163	134391	434091	138198	3.14109	1.65126	1.21554e-65	9.05027e-62
ENSRNOG00000025359	Spesp1	115.321	67.793	61.0301	20.6564	29.5522	31.4689	81.3814	27.2258	2.98639	1.5784	2.14831e-05	0.00131648
ENSRNOG00000049334	Atp2c2	574.651	811.522	735.267	195.203	306.731	210.448	707.147	237.461	2.97806	1.57437	4.02527e-17	3.5259e-14
ENSRNOG00000033261	Fam107a	318.599	421.713	424.305	111.545	136.551	145.544	388.205	131.213	2.95688	1.56408	7.88233e-17	6.52088e-14
ENSRNOG00000049132	AABR07029710.1	75.2519	150.54	64.905	24.7877	48.9139	25.5685	96.8991	33.09	2.92813	1.54998	9.40892e-05	0.00450509
ENSRNOG00000002810	Gfpt2	312.735	101.69	99.7794	64.0349	47.8949	69.8216	171.401	60.5838	2.82875	1.50016	9.08102e-05	0.00436211
ENSRNOG00000020117	Brms1	100.662	84.7413	104.623	56.8052	39.7426	6.88382	96.6753	34.4772	2.81048	1.49082	0.00126742	0.0330528
ENSRNOG00000007061	Arhgef33	49.8422	33.8965	32.9369	13.4267	17.3237	11.8008	38.8919	14.1837	2.74411	1.45634	0.00182242	0.0425355
ENSRNOG00000039390	Slc37a2	2201.85	1856.33	1062.7	851.045	677.661	401.228	1706.96	643.312	2.65356	1.40793	0.0010626	0.0291939
ENSRNOG00000012262	Depdc7	87.9568	129.604	94.9357	28.919	39.7426	49.1701	104.166	39.2772	2.6477	1.40474	7.0229e-06	0.000530853
ENSRNOG00000016058	Kazald1	1720.04	1611.08	1571.28	589.741	566.586	751.319	1634.14	635.882	2.56903	1.36122	3.73748e-27	9.27579e-24
ENSRNOG00000007319	Trib3	449.557	813.516	431.086	176.612	277.179	208.481	564.72	220.758	2.55761	1.3548	8.58005e-09	1.77452e-06
ENSRNOG00000047321	Hba2	152.458	448.63	253.808	108.446	133.494	104.241	284.966	115.394	2.46922	1.30405	1.52522e-05	0.00100496
ENSRNOG00000059166	Ldb3	521.877	484.521	300.307	201.4	147.761	182.913	435.568	177.358	2.45567	1.29612	1.19259e-09	3.11559e-07
ENSRNOG00000036827	Ppp1r1a	454.443	1084.69	845.703	376.98	327.112	307.805	794.945	337.299	2.35684	1.23685	0.000784837	0.0229157
ENSRNOG00000047708	Gstz1	904.978	698.866	808.891	325.339	310.807	388.444	804.245	341.53	2.35422	1.23525	3.11931e-17	2.9031e-14
ENSRNOG00000000547	Tspyl4	100.662	99.6956	82.3422	40.28	44.8378	35.4025	94.2332	40.1734	2.34653	1.23053	2.52071e-05	0.00149951
ENSRNOG00000019661	Gdf15	136.822	210.358	96.8732	51.6411	101.904	38.3527	148.018	63.9659	2.31479	1.21088	0.000709826	0.02114
ENSRNOG00000025444	RGD1565682	262.893	179.452	149.185	74.3632	79.4851	104.241	197.177	86.0296	2.2903	1.19554	3.5006e-06	0.000294505
ENSRNOG00000001728	Fam43a	214.028	315.038	364.243	133.234	146.742	114.075	297.77	131.35	2.26781	1.1813	7.86975e-08	1.12497e-05
ENSRNOG00000029886	Hba1	547.287	1359.85	886.39	372.849	433.092	432.697	931.175	412.879	2.25519	1.17325	0.00152326	0.037246
ENSRNOG00000000525	Pi16	160.277	61.8113	75.5611	36.1488	38.7235	57.0373	99.2164	43.9699	2.25485	1.17303	0.00196139	0.0445521
ENSRNOG00000011921	Dusp4	2634.79	1850.35	2478.98	924.375	1073.05	1098.46	2321.38	1031.96	2.24939	1.16954	1.62679e-17	1.73032e-14
ENSRNOG00000003221	Myoc	178.845	233.288	147.247	68.1662	71.3328	113.091	186.46	84.1968	2.21156	1.14506	1.35261e-05	0.000903215
ENSRNOG00000020060	Atf5	937.228	494.49	498.897	285.059	371.95	227.166	643.539	294.725	2.18407	1.12702	1.7473e-06	0.000157691
ENSRNOG00000019206	Nupr1	193.505	261.203	226.683	114.643	125.342	72.7718	227.13	104.252	2.18042	1.12461	1.52022e-06	0.000143067
ENSRNOG00000061299	AC113925.2	192.528	483.524	332.275	145.628	172.218	156.361	336.109	158.069	2.1259	1.08807	3.33295e-05	0.00188711
ENSRNOG00000034290	Ccl21	70.3654	78.7596	83.3109	40.28	32.6093	37.3693	77.4786	36.7529	2.10832	1.0761	0.000495808	0.016517
ENSRNOG00000007575	Lppr1	84.0476	99.6956	81.3735	32.0175	44.8378	49.1701	88.3722	42.0084	2.1011	1.07115	0.000405614	0.0139389
ENSRNOG00000001962	Fam3b	2966.1	1743.68	1867.71	959.491	925.288	1262.69	2192.5	1049.16	2.08957	1.06321	3.80759e-09	8.85918e-07
ENSRNOG00000049349	Fam19a5	272.666	489.506	325.494	202.433	136.551	187.83	362.555	175.605	2.06416	1.04555	4.49308e-06	0.000365976
ENSRNOG00000005248	Slc1a4	559.014	515.426	476.616	265.435	323.036	164.228	517.019	250.9	2.06179	1.0439	3.05474e-07	3.63905e-05
ENSRNOG00000013737	Bcar3	311.758	307.063	313.869	99.1509	135.532	217.332	310.897	150.672	2.06121	1.04349	1.04732e-05	0.000728767
ENSRNOG00000027694	LOC100362830	119.23	133.592	276.089	82.6257	89.6755	84.5726	176.304	85.6246	2.05963	1.04238	0.000543114	0.0173925
ENSRNOG00000029651	Rdh16	295.144	409.749	212.152	127.037	187.503	139.643	305.682	151.395	2.01865	1.01339	2.67796e-05	0.00156998
ENSRNOG00000005826	AABR07065923.1	156.368	159.513	137.56	81.5929	39.7426	103.257	151.147	74.8642	2.01716	1.01233	0.000662545	0.0202041
ENSRNOG00000028747	AABR07073039.1	130.958	84.7413	81.3735	39.2472	51.971	57.0373	99.0242	49.4185	2.0024	1.00173	0.0011389	0.0307793
ENSRNOG00000056672	AABR07027390.2	79.1611	59.8174	66.8425	34.0831	35.6664	33.4357	68.607	34.3951	1.9952	0.996535	0.00216251	0.0477066
ENSRNOG00000048793	LOC684471	574.651	415.731	433.992	187.974	220.113	307.805	474.791	238.63	1.98848	0.991669	5.55383e-07	6.1718e-05
ENSRNOG00000005853	Tacr1	399.715	375.853	371.993	183.842	150.818	251.751	382.52	195.47	1.95557	0.967589	3.42915e-07	4.05266e-05
ENSRNOG00000005287	Syne3	144.64	155.525	169.528	75.396	71.3328	93.4232	156.564	80.0507	1.95456	0.966844	2.22456e-05	0.00135762
ENSRNOG00000011260	Cmbl	814.089	664.97	631.613	365.619	381.121	347.141	703.557	364.627	1.92975	0.948412	1.5501e-11	6.78898e-09
ENSRNOG00000006508	Thnsl2	236.506	153.531	189.871	96.0524	116.171	88.5062	193.303	100.243	1.92927	0.948054	4.05294e-05	0.00222703
ENSRNOG00000008134	Mefv	164.186	159.513	132.716	90.8883	65.2185	81.6224	152.138	79.2431	1.91984	0.940983	6.56664e-05	0.00333733
ENSRNOG00000037188	LOC100911833	479.853	588.204	591.895	246.844	353.607	266.502	553.318	288.984	1.91474	0.937149	2.1194e-08	3.71294e-06
ENSRNOG00000014705	Rbm20	155.39	127.61	164.684	70.2319	66.2376	97.3568	149.228	77.9421	1.91321	0.935992	0.000142904	0.0062958
ENSRNOG00000038045	Rpl34-ps1	133.89	90.723	86.2171	57.838	44.8378	59.9875	103.61	54.2211	1.91047	0.93393	0.00141584	0.0356135
ENSRNOG00000007213	Yars	1506.99	1311.99	1099.51	620.726	896.755	554.639	1306.17	690.707	1.89126	0.91935	8.18679e-08	1.15009e-05
ENSRNOG00000019484	Slc6a9	1030.07	816.507	605.457	507.115	493.215	296.988	817.345	432.439	1.89064	0.918876	1.11002e-05	0.000768804
ENSRNOG00000042018	RGD1306750	288180	338091	323812	147656	164307	195195	316694	169053	1.87334	0.905616	6.01272e-16	4.71239e-13
ENSRNOG00000012582	Eif4ebp1	3676.59	2965.95	2706.64	1505.85	2079.86	1455.44	3116.39	1680.38	1.85465	0.891144	2.15672e-09	5.26487e-07
ENSRNOG00000028805	RGD1564114	211.096	157.519	145.31	79.5273	108.018	92.4398	171.308	93.3284	1.83531	0.876025	0.000209802	0.00828689
ENSRNOG00000032922	Dclk1	170.05	194.406	171.466	85.7242	81.5232	125.876	178.641	97.7076	1.82628	0.868906	0.00015864	0.0066807
ENSRNOG00000007139	Ttpa	167.118	181.446	145.31	70.2319	114.132	87.5228	164.625	90.629	1.8159	0.860681	0.000316989	0.0115977
ENSRNOG00000000925	Psph	277.553	301.081	232.496	149.759	187.503	110.141	270.376	149.135	1.81383	0.859037	6.13211e-05	0.00315963
ENSRNOG00000017622	Npm3	197.414	240.266	189.871	141.497	118.209	87.5228	209.184	115.743	1.80862	0.854892	0.000128068	0.00577896
ENSRNOG00000023348	Tbc1d2	151.481	144.559	121.091	87.7898	72.3518	70.805	139.044	76.9822	1.80682	0.853457	0.000314282	0.011527
ENSRNOG00000034228	Pik3c2g	329.349	257.215	230.558	98.1181	205.846	153.411	272.374	152.458	1.78609	0.836808	0.000670308	0.0203592
ENSRNOG00000013040	Ddx31	168.095	211.355	186.965	120.84	111.075	86.5394	188.805	106.152	1.77972	0.831651	0.00012031	0.00549551
ENSRNOG00000028746	Gsto1	188.618	301.081	259.62	105.348	141.647	175.046	249.773	140.68	1.77399	0.826999	0.000405418	0.0139389
ENSRNOG00000003835	Slc43a2	979.252	733.76	599.645	521.575	417.806	369.759	770.886	436.38	1.76696	0.82127	7.12551e-06	0.000535888
ENSRNOG00000003969	Fam20a	1344.76	1582.17	1379.47	776.682	740.842	919.481	1435.47	812.335	1.76665	0.821015	1.81807e-11	7.52889e-09
ENSRNOG00000013304	Arg1	2335.74	1952.04	1582.91	1127.84	1346.15	869.328	1956.9	1114.44	1.75614	0.812404	7.44358e-07	7.86116e-05
ENSRNOG00000000245	Slc16a6	161.254	142.565	120.123	88.8227	76.428	77.6888	141.314	80.9798	1.74536	0.803522	0.000630777	0.0195279
ENSRNOG00000042556	Bmyc	720.268	404.764	561.864	323.273	297.56	355.992	562.299	325.608	1.72691	0.788196	3.49466e-05	0.00195095
ENSRNOG00000014610	Anpep	1506.99	1529.33	1388.19	923.343	731.671	915.548	1474.84	856.854	1.72109	0.783324	5.88478e-11	2.03791e-08
ENSRNOG00000002947	Dpt	232.597	278.151	252.839	146.661	156.932	142.593	254.529	148.729	1.71137	0.775151	1.33998e-05	0.00089881
ENSRNOG00000022946	Slc22a3	1953.62	1631.02	1570.31	952.262	877.393	1183.03	1718.32	1004.23	1.71079	0.774659	8.99912e-09	1.81089e-06
ENSRNOG00000018774	Rps14	4147.65	6443.33	6270.6	3569.43	3278.25	3025.93	5620.53	3291.2	1.70777	0.772118	1.16541e-07	1.53576e-05
ENSRNOG00000022267	Pabpc1l2a	348.895	413.737	274.151	234.451	158.97	222.249	345.594	205.223	1.68358	0.751532	0.000202876	0.00807762
ENSRNOG00000005975	Rpl30	1580.29	2062.7	3109.63	1283.8	1343.09	1393.48	2250.87	1340.12	1.67962	0.748133	3.49811e-05	0.00195095
ENSRNOG00000011488	Sergef	346.941	380.837	398.149	200.367	253.741	221.266	375.309	225.125	1.66702	0.737273	3.84728e-06	0.000320055
ENSRNOG00000049560	Glul	8588.49	9264.72	8560.68	4078.61	5442.69	6363.6	8804.63	5294.97	1.66274	0.733564	5.63801e-08	8.39556e-06
ENSRNOG00000011155	AABR07072207.1	191.55	207.367	172.434	109.479	103.942	131.776	190.451	115.066	1.65401	0.725966	0.000392395	0.0136522
ENSRNOG00000002714	Mettl22	225.756	169.483	226.683	135.3	126.361	115.058	207.307	125.573	1.65186	0.724091	0.000400492	0.0138691
ENSRNOG00000033915	Gpt	803.339	967.048	1142.13	497.82	675.623	592.992	970.84	588.812	1.64874	0.721364	3.26763e-06	0.000278048
ENSRNOG00000014382	C2cd5	1555.86	1961.01	1727.25	996.673	1118.91	1069.94	1748.04	1061.84	1.64609	0.719047	4.37474e-10	1.27791e-07
ENSRNOG00000025459	Mars	2299.58	2051.74	1560.63	1259.01	1531.62	831.958	1970.65	1207.53	1.63215	0.706773	0.000146355	0.00635551
ENSRNOG00000019328	Phgdh	1902.8	1958.02	1885.15	1148.5	1340.04	1035.52	1915.32	1174.69	1.63067	0.705468	5.03283e-10	1.44123e-07
ENSRNOG00000048456	Rpl8	137.799	125.617	156.935	88.8227	87.6374	81.6224	140.117	86.0275	1.62945	0.704388	0.00185049	0.0428914
ENSRNOG00000020743	Cyp2s1	330.327	246.248	277.057	187.974	183.427	155.378	284.544	175.593	1.62129	0.697143	0.000145354	0.00635551
ENSRNOG00000008469	Mettl5	185.687	162.504	171.466	82.6257	118.209	119.975	173.219	106.936	1.61891	0.695024	0.0016132	0.0389337
ENSRNOG00000004290	Grb10	879.568	611.134	531.834	402.8	509.52	337.307	674.179	416.542	1.61881	0.69493	0.000364124	0.0128403
ENSRNOG00000025909	Uqcc2	206.21	249.239	244.12	152.858	153.875	126.859	233.19	144.531	1.61405	0.690686	0.000251076	0.00963602
ENSRNOG00000016220	Rpl12	3054.06	4624.88	3058.29	1841.52	2422.26	2390.65	3579.07	2218.14	1.61342	0.690121	1.31765e-05	0.000891417
ENSRNOG00000059876	Fsd1l	172.004	170.48	138.529	91.9211	103.942	103.257	160.338	99.7068	1.60748	0.684801	0.00150687	0.0370277
ENSRNOG00000014087	Kifc3	217.937	199.391	254.776	170.416	123.304	125.876	224.035	139.865	1.60286	0.680648	0.000913696	0.025845
ENSRNOG00000034180	Rpl37	816.044	648.022	630.644	475.098	362.778	469.083	698.237	435.653	1.60266	0.680466	1.024e-05	0.000715884
ENSRNOG00000046349	LOC100360604	566.833	505.457	508.584	416.227	315.902	255.685	526.958	329.271	1.60124	0.679189	9.48073e-05	0.00452492
ENSRNOG00000015756	Nphp1	430.988	388.813	403.961	209.663	302.655	252.734	407.921	255.017	1.59942	0.677552	4.37717e-05	0.00237885
ENSRNOG00000009823	Naa38	230.642	337.968	385.555	239.615	200.751	158.328	318.055	199.564	1.59455	0.673145	0.00199448	0.0450681
ENSRNOG00000043114	Tomm7	360.623	484.521	476.616	368.717	244.57	221.266	440.587	278.184	1.5845	0.664024	0.000918034	0.025845
ENSRNOG00000017702	Gpld1	460.307	448.63	402.992	259.238	295.522	274.369	437.31	276.376	1.58213	0.661866	4.63551e-06	0.000369131
ENSRNOG00000021395	LOC100363452	226.733	239.27	259.62	139.431	173.237	146.527	241.874	153.065	1.58033	0.660226	0.00029878	0.0110127
ENSRNOG00000016580	Rps23	4408.59	4998.74	5175.93	3059.22	3042.85	3135.09	4861.09	3079.05	1.57874	0.658774	1.33327e-12	6.84612e-10
ENSRNOG00000042886	Rps28	1263.65	1108.62	1041.39	784.944	659.319	721.817	1137.88	722.027	1.57603	0.656291	7.93243e-08	1.12497e-05
ENSRNOG00000021201	Txnip	13405.6	9214.87	9506.16	7576.78	6517.78	6324.26	10708.9	6806.27	1.57341	0.653897	1.77137e-06	0.000158901
ENSRNOG00000015335	Rpl13	6266.43	6366.56	6661	3957.77	3993.62	4330.9	6431.33	4094.1	1.57082	0.651522	1.15309e-14	7.15443e-12
ENSRNOG00000029574	Rps4x	1117.05	634.064	669.394	457.54	558.434	527.104	806.836	514.359	1.5686	0.649479	0.000703304	0.0209878
ENSRNOG00000014832	Mapkapk3	837.544	766.659	662.613	524.673	476.911	449.415	755.605	483.666	1.56247	0.643827	1.65655e-06	0.000151335
ENSRNOG00000020255	Sars	2809.73	2186.33	1775.69	1431.49	1776.19	1128.95	2257.25	1445.54	1.56164	0.643061	0.000191144	0.0077136
ENSRNOG00000061312	Phf10	850.249	609.14	534.74	420.358	490.158	367.792	664.71	426.103	1.56022	0.641747	0.000326751	0.0118386
ENSRNOG00000005116	AABR07054332.1	1497.22	1586.16	1708.84	877.898	1075.09	1140.75	1597.41	1031.24	1.54876	0.631115	1.95022e-07	2.42006e-05
ENSRNOG00000029698	Pim3	2271.24	2303.97	2391.8	1640.12	1280.93	1577.38	2322.33	1499.48	1.54875	0.631106	1.63204e-08	2.96375e-06
ENSRNOG00000059705	Elmo1	603.97	791.583	623.863	426.555	466.72	412.046	673.139	435.107	1.54697	0.629449	1.163e-05	0.000794417
ENSRNOG00000014179	Rps2	3593.52	4599.96	4375.76	2250.52	2913.43	2969.88	4189.75	2711.28	1.5452	0.627791	1.08138e-06	0.000108185
ENSRNOG00000024066	Fundc2	517.968	547.329	545.396	268.534	434.111	340.257	536.898	347.634	1.54426	0.626913	0.000212039	0.00833105
ENSRNOG00000018487	Slc3a2	6519.55	7490.13	5905.39	4803.65	5041.19	3052.48	6638.36	4299.11	1.54419	0.626849	6.90675e-05	0.00347461
ENSRNOG00000020372	Hdac4	282.439	232.291	201.496	170.416	163.046	130.793	238.742	154.751	1.54344	0.626151	0.00184528	0.0428841
ENSRNOG00000055408	Gcat	363.555	381.834	419.461	225.155	278.198	251.751	388.283	251.701	1.54255	0.625319	5.29493e-05	0.00281595
ENSRNOG00000014829	Prmt3	197.414	242.26	213.121	129.103	166.103	128.826	217.599	141.344	1.53953	0.62249	0.00160756	0.0388606
ENSRNOG00000018748	Slc16a11	470.08	476.545	562.833	371.816	279.217	330.423	503.153	327.152	1.53824	0.621279	5.77401e-05	0.00300632
ENSRNOG00000047737	Rpl7a	224.778	292.108	244.12	159.055	177.313	158.328	253.669	164.898	1.53816	0.621206	0.000679034	0.0204686
ENSRNOG00000028505	Rps18	5941.97	5623.83	5980.95	3697.5	4000.75	3727.09	5848.92	3808.45	1.5358	0.61899	1.65184e-13	9.46061e-11
ENSRNOG00000003228	Mid1ip1	384.078	364.886	327.431	315.011	202.789	183.896	358.798	233.899	1.53484	0.618089	0.00214885	0.0475613
ENSRNOG00000017418	Rps3	5999.63	7760.31	7632.64	4372.97	4762.99	4833.42	7130.86	4656.46	1.53135	0.614808	3.35934e-08	5.43739e-06
ENSRNOG00000031315	Rpl36al	179.823	193.41	187.934	131.168	128.399	108.174	187.055	122.581	1.52665	0.610367	0.00189518	0.0436183
ENSRNOG00000004978	Prkacb	510.149	569.262	508.584	274.731	333.226	433.68	529.332	347.212	1.52362	0.607503	0.000330775	0.0119263
ENSRNOG00000021035	Rpl18	5180.66	6723.47	6821.81	3987.72	4225.96	4084.07	6241.98	4099.25	1.5227	0.606634	7.82505e-08	1.12497e-05
ENSRNOG00000026821	Arhgap42	330.327	258.212	294.494	172.481	169.161	239.95	294.344	193.864	1.51751	0.60171	0.0017081	0.0407825
ENSRNOG00000016660	Cox5b	1153.21	1425.65	1393.04	1012.17	638.938	967.668	1323.97	872.924	1.51663	0.600868	0.000189704	0.00769251
ENSRNOG00000016193	RGD1562114	359.646	324.011	320.65	206.564	223.17	233.066	334.769	220.933	1.51491	0.599237	0.000119248	0.00547698
ENSRNOG00000018645	Rpsa	11069.9	12064.2	12878.3	7396.04	7834.38	8553.63	12004.1	7928.02	1.51411	0.598466	3.16595e-10	1.00057e-07
ENSRNOG00000006824	Hdac11	444.67	393.798	435.929	273.698	257.817	311.739	424.799	281.084	1.51095	0.595458	5.83664e-05	0.00302834
ENSRNOG00000001049	Tpt1	19785.4	20613.1	23962.5	12828.7	13813.1	15983.2	21453.7	14208.3	1.50992	0.594469	4.91357e-08	7.46612e-06
ENSRNOG00000006916	Sardh	573.674	532.375	485.335	302.617	398.445	355.992	530.461	352.351	1.50524	0.589995	7.13038e-05	0.00356303
ENSRNOG00000006327	Rcc2	878.591	1036.83	816.641	590.774	653.205	571.357	910.689	605.112	1.50494	0.589702	5.22621e-06	0.000407453
ENSRNOG00000013825	Rap1gap	4299.13	3496.33	4091.92	2875.38	1825.1	3207.86	3962.46	2636.11	1.5031	0.587941	0.000344196	0.0122912
ENSRNOG00000014214	Rpl27a	5198.25	4608.93	4775.85	3042.69	3209.98	3450.76	4861.01	3234.48	1.50281	0.587662	3.22526e-10	1.00057e-07
ENSRNOG00000042344	Smim22	340.1	419.719	396.211	223.089	280.236	266.502	385.343	256.609	1.50125	0.586161	0.000278783	0.0104306
ENSRNOG00000010800	Hadhb	2755.98	2566.17	2292.02	1666.97	1767.02	1640.32	2538.05	1691.43	1.50054	0.585482	9.62631e-09	1.91127e-06
ENSRNOG00000042950	Slc5a9	721.246	497.481	411.711	390.407	336.283	359.925	543.479	362.205	1.50053	0.585469	0.00195418	0.0445521
ENSRNOG00000014272	Rpl35	5627.28	5357.64	5354.18	3339.11	3794.9	3756.6	5446.37	3630.2	1.50024	0.585193	5.69685e-11	2.0198e-08
ENSRNOG00000018795	Rpl18a	4103.67	4515.22	4972.5	3018.94	2942.99	3115.42	4530.46	3025.78	1.49728	0.58234	2.21017e-09	5.30834e-07
ENSRNOG00000008106	Shmt2	407.533	390.807	334.212	245.812	295.522	216.349	377.518	252.561	1.49509	0.580235	0.000573173	0.0180829
ENSRNOG00000033030	AABR07072440.1	330.327	374.856	445.617	263.37	237.436	269.452	383.6	256.753	1.49403	0.579213	0.000401612	0.0138757
ENSRNOG00000003786	Tspan6	1649.68	1459.54	1556.75	923.343	1117.89	1086.66	1555.32	1042.63	1.49162	0.576878	2.92766e-07	3.51579e-05
ENSRNOG00000025179	LOC100361061	503.308	600.168	630.644	399.702	378.064	385.494	578.04	387.753	1.4908	0.576089	2.77662e-05	0.0016151
ENSRNOG00000009614	LOC300249	395.806	344.947	347.775	221.024	247.627	261.585	362.842	243.412	1.49026	0.575563	0.000208475	0.00825639
ENSRNOG00000048232	Olr1748	685.086	495.487	677.144	406.932	415.768	425.813	619.239	416.171	1.4881	0.573472	0.000138936	0.00613916
ENSRNOG00000000985	Cpsf4	382.123	552.314	533.771	339.798	322.017	326.49	489.403	329.435	1.48555	0.570993	0.000476041	0.015894
ENSRNOG00000031965	Impdh2	525.786	607.146	530.865	416.227	351.569	355.008	554.599	374.268	1.48199	0.567532	4.42637e-05	0.00239684
ENSRNOG00000007023	Galm	418.283	327.002	355.525	205.532	300.617	237	366.937	247.716	1.48132	0.566887	0.00166021	0.0398744
ENSRNOG00000013023	Gltscr2	1834.39	1553.26	1754.37	1190.84	1029.23	1252.85	1714.01	1157.64	1.48055	0.566134	8.67983e-07	8.91388e-05
ENSRNOG00000019922	Ntpcr	311.758	286.126	248.964	166.284	210.941	194.714	282.283	190.646	1.48028	0.565874	0.00143352	0.0359368
ENSRNOG00000018279	Sfxn1	650.88	564.277	503.741	340.831	447.358	374.676	572.966	387.622	1.47808	0.563729	0.00024594	0.00948782
ENSRNOG00000013422	Med23	1093.6	1059.76	790.485	686.826	679.7	625.444	981.282	663.99	1.47787	0.56352	5.40632e-05	0.00286496
ENSRNOG00000014565	Lcmt1	450.534	328.996	296.432	231.352	261.893	235.033	358.654	242.759	1.47745	0.563111	0.00217398	0.0478887
ENSRNOG00000043866	AY172581.24	1603.75	1631.02	1780.53	1034.89	944.65	1425.93	1671.77	1135.16	1.47244	0.558209	0.000104012	0.00490139
ENSRNOG00000016469	Fxyd2	3029.62	3564.12	4078.36	1885.93	2627.08	2756.48	3557.37	2423.16	1.46797	0.553826	0.000148802	0.00642262
ENSRNOG00000015859	Chdh	489.626	517.42	501.803	282.993	445.32	299.938	502.95	342.75	1.4675	0.553359	0.00151414	0.037084
ENSRNOG00000011104	LOC100363800	1354.53	1546.28	1666.22	1076.2	1012.93	1024.71	1522.34	1037.94	1.46676	0.552634	6.19316e-07	6.68278e-05
ENSRNOG00000012683	Abhd17c	1889.12	1524.35	1301.01	1024.56	1157.63	1040.44	1571.49	1074.21	1.46292	0.548853	6.1947e-05	0.00318087
ENSRNOG00000018991	Gsn	5443.55	4463.37	4649.91	3375.26	3496.33	3081.98	4852.28	3317.86	1.46254	0.548478	1.31948e-07	1.69383e-05
ENSRNOG00000018320	Rps15a	2650.43	3004.83	3033.1	2055.32	2012.6	1879.28	2896.12	1982.4	1.46099	0.546948	1.81177e-08	3.2118e-06
ENSRNOG00000020093	LOC100360573	761.315	882.306	880.577	570.118	587.986	576.274	841.4	578.126	1.45535	0.541369	4.3993e-06	0.000361934
ENSRNOG00000000867	Vars	858.067	915.206	853.453	634.152	631.805	542.838	875.575	602.932	1.45247	0.538504	5.21667e-06	0.000407453
ENSRNOG00000019106	Rps17	3401.97	3887.13	3835.21	2392.01	2600.59	2670.92	3708.11	2554.51	1.45151	0.537554	2.35986e-08	4.03916e-06
ENSRNOG00000016952	LOC686442	1057.44	1403.71	1345.57	893.391	898.793	830.975	1268.91	874.386	1.45124	0.537287	2.33073e-05	0.00140291
ENSRNOG00000008551	Rps7	6666.15	7062.44	7633.61	4739.62	4886.3	5105.83	7120.73	4910.58	1.45006	0.536109	1.44208e-09	3.70242e-07
ENSRNOG00000007779	Kank4	375.282	365.883	365.212	231.352	239.474	294.037	368.792	254.955	1.44581	0.531874	0.000652343	0.020029
ENSRNOG00000020288	Slc25a20	657.721	597.177	536.677	423.457	437.168	380.577	597.192	413.734	1.44364	0.529706	0.000101452	0.0048112
ENSRNOG00000019737	Sema4a	1181.55	953.09	1018.14	699.22	612.443	873.261	1050.93	728.308	1.44269	0.528763	0.000283263	0.010565
ENSRNOG00000011893	Rps3a	8888.52	10247.7	10404.2	6577.01	6782.73	7136.55	9846.81	6832.1	1.44123	0.527301	1.23847e-08	2.27679e-06
ENSRNOG00000009273	LOC259244	2997.37	2178.35	2623.33	2082.17	1489.84	1840.93	2599.68	1804.31	1.44088	0.526955	0.000201496	0.00804419
ENSRNOG00000020618	Rpl13a	7011.13	8036.47	8102.47	5150.68	5401.93	5526.72	7716.69	5359.78	1.43971	0.525781	8.27945e-09	1.73647e-06
ENSRNOG00000020853	Scap	1051.57	1028.86	1011.36	703.352	722.499	723.784	1030.6	716.545	1.43823	0.52429	4.21947e-07	4.87071e-05
ENSRNOG00000003201	LOC100362640	5784.63	6087.42	5974.17	3796.65	4199.46	4414.49	5948.74	4136.87	1.4379	0.523968	5.79588e-09	1.25082e-06
ENSRNOG00000036649	Pwwp2b	403.624	414.734	449.492	289.19	256.798	336.324	422.616	294.104	1.43653	0.522583	0.000635049	0.0196193
ENSRNOG00000010629	Nod1	387.987	310.053	356.493	253.041	217.055	264.535	351.511	244.877	1.4354	0.521453	0.00139302	0.0352781
ENSRNOG00000017447	Eif2s2	2074.8	2149.44	1797	1265.21	1773.13	1159.43	2007.08	1399.26	1.43446	0.520506	0.000453502	0.0151755
ENSRNOG00000019229	Fbl	250.188	276.157	245.089	191.072	167.123	179.963	257.145	179.386	1.4334	0.519438	0.0022838	0.0495744
ENSRNOG00000011138	Rpl29	3839.8	4069.58	4342.82	2387.88	2960.31	3202.94	4084.07	2850.38	1.43271	0.518747	8.53616e-06	0.000623098
ENSRNOG00000023529	Rpl5	8342.21	9344.47	9406.39	6027.55	6383.27	6552.41	9031.02	6321.07	1.42869	0.51469	5.26444e-09	1.15284e-06
ENSRNOG00000020354	Mrpl23	362.577	399.78	358.431	212.761	281.255	291.087	373.596	261.701	1.42686	0.512844	0.00188185	0.0433786
ENSRNOG00000028632	Bcl2l14	705.609	503.463	508.584	362.52	459.587	383.527	572.552	401.878	1.42477	0.510726	0.00212055	0.0473421
ENSRNOG00000018404	Aars	2707.11	2551.21	2198.05	1812.6	2093.11	1331.53	2485.46	1745.75	1.42386	0.509806	0.000579626	0.0182478
ENSRNOG00000003583	Smyd2	590.288	670.952	571.552	452.376	414.749	420.896	610.93	429.34	1.42291	0.508849	8.69101e-05	0.00420188
ENSRNOG00000017494	Acp6	492.558	410.746	418.492	320.175	263.931	345.174	440.599	309.76	1.42214	0.508063	0.00120444	0.0320274
ENSRNOG00000019578	Rps16	5760.19	6276.84	6269.63	4043.5	4360.47	4513.82	6102.22	4305.93	1.41711	0.502955	1.21462e-08	2.27679e-06
ENSRNOG00000057194	Tars2	401.669	317.032	346.806	237.549	259.855	254.701	355.169	250.702	1.41672	0.50255	0.00148525	0.0367389
ENSRNOG00000010989	Ipo5	1176.67	1435.62	1127.6	870.669	907.964	863.427	1246.63	880.687	1.41541	0.501217	3.15399e-05	0.00180639
ENSRNOG00000036934	Abhd12	590.288	841.431	707.174	486.459	470.796	553.656	712.964	503.637	1.41525	0.501061	0.000843528	0.0243902
ENSRNOG00000011494	Rpl36al	1953.62	1512.38	1377.54	938.835	1142.34	1344.31	1614.51	1141.83	1.41376	0.499536	0.00117313	0.0314192
ENSRNOG00000010567	Angel1	658.699	628.083	616.113	494.722	453.473	398.278	634.298	448.824	1.41369	0.499467	0.000133891	0.00600533
ENSRNOG00000009963	Ctps1	692.904	743.729	630.644	430.687	603.272	428.763	689.093	487.574	1.41337	0.499134	0.00128645	0.0333738
ENSRNOG00000021132	Trmt112	423.17	389.81	415.586	284.026	287.369	297.971	409.522	289.789	1.41312	0.498886	0.000343994	0.0122912
ENSRNOG00000018796	Herpud1	4573.75	5791.32	4436.79	3001.38	3454.54	4041.78	4933.95	3499.24	1.4099	0.495588	0.000158819	0.0066807
ENSRNOG00000029410	RGD1562469	591.265	636.058	674.237	445.146	431.054	473.017	633.854	449.739	1.40924	0.494912	7.69493e-05	0.00381951
ENSRNOG00000012563	Arhgap29	639.153	637.055	719.768	430.687	462.644	524.153	665.325	472.495	1.4078	0.493445	0.000172635	0.00710139
ENSRNOG00000009378	Rpl4	9253.05	10615.6	10421.6	6490.25	7314.67	7711.84	10096.8	7172.25	1.40771	0.49335	5.28178e-07	5.95841e-05
ENSRNOG00000015866	Hint2	600.061	635.061	536.677	454.442	443.282	362.875	590.6	420.2	1.40585	0.491439	0.000501104	0.0166088
ENSRNOG00000009723	Ptpmt1	278.53	329.993	320.65	210.696	232.341	218.315	309.724	220.451	1.40485	0.490413	0.0022189	0.0485192
ENSRNOG00000008190	LOC100911867	578.56	565.274	686.831	456.507	409.654	437.614	610.222	434.592	1.40432	0.489867	0.000267072	0.0100938
ENSRNOG00000010420	Shfm1	481.808	664.97	638.394	454.442	420.863	397.295	595.057	424.2	1.40291	0.488418	0.00126727	0.0330528
ENSRNOG00000037402	Myeov2	631.334	625.092	681.987	473.032	465.701	443.514	646.138	460.749	1.4026	0.488104	5.55213e-05	0.00292144
ENSRNOG00000006901	Cd320	660.653	849.407	819.547	498.853	514.615	647.079	776.536	553.516	1.40247	0.487969	0.000920786	0.0258706
ENSRNOG00000006992	Rpl7	8077.37	8731.34	9170.98	6014.12	6223.28	6289.84	8659.9	6175.75	1.40223	0.487725	1.0402e-08	2.00083e-06
ENSRNOG00000005668	Ndufa8	449.557	584.216	541.521	379.046	368.892	375.66	525.098	374.533	1.40189	0.487376	0.000644773	0.0198374
ENSRNOG00000010746	Rpl32	3919.94	4752.49	5136.22	3125.32	3487.15	3275.71	4602.88	3296.06	1.39648	0.48179	1.6476e-05	0.00107249
ENSRNOG00000017852	Nars	2938.73	3089.57	2405.36	1974.75	2396.78	1669.82	2811.22	2013.78	1.39605	0.481348	0.000508034	0.016737
ENSRNOG00000020602	Ndufa13	524.809	726.781	795.329	492.656	488.12	486.784	682.306	489.187	1.3948	0.480055	0.00215273	0.0475613
ENSRNOG00000015236	Mybbp1a	872.727	1034.84	766.267	637.251	657.281	622.494	891.278	639.008	1.39465	0.479903	0.000296466	0.0109545
ENSRNOG00000002342	Aldh3a2	545.332	625.092	518.272	415.194	383.159	413.029	562.898	403.794	1.3938	0.479023	0.000357294	0.012698
ENSRNOG00000001148	Rplp0	15623.1	15335.2	15520.1	10141.3	11577.3	11644.5	15492.8	11121	1.39309	0.478284	3.01584e-08	5.04595e-06
ENSRNOG00000004107	Rpl23	4587.44	5136.32	5336.74	3252.36	3826.49	3735.95	5020.17	3604.93	1.39254	0.477717	2.4691e-06	0.000213764
ENSRNOG00000025581	Vwa2	517.968	622.101	712.018	450.31	423.921	458.266	617.362	444.165	1.38993	0.475015	0.00103793	0.0286748
ENSRNOG00000002393	Eprs	4622.62	4491.29	3572.68	2785.52	3693	2657.15	4228.86	3045.22	1.3887	0.473739	0.000582685	0.0182897
ENSRNOG00000021638	Eef1d	1141.48	1227.25	1085.95	841.75	854.974	791.639	1151.56	829.454	1.38837	0.473391	9.92637e-06	0.000703874
ENSRNOG00000016387	Rpl34	2914.3	3515.27	3537.81	2209.21	2525.18	2449.66	3322.46	2394.68	1.38738	0.472363	1.1476e-05	0.000787506
ENSRNOG00000012123	Fdx1	469.103	467.573	495.991	307.781	360.74	365.826	477.555	344.782	1.3848	0.46968	0.000675731	0.0204518
ENSRNOG00000021174	Macrod1	529.695	595.183	614.176	451.343	402.521	403.195	579.685	419.02	1.38364	0.468465	0.000372748	0.0130346
ENSRNOG00000033734	Tnnt2	1063.3	1269.13	1278.73	793.207	809.118	1010.94	1203.72	871.087	1.38155	0.466283	0.000372894	0.0130346
ENSRNOG00000030763	Dpp4	1529.47	1294.05	1146.01	869.636	853.955	1151.56	1323.18	958.385	1.38035	0.465037	0.00144461	0.0360868
ENSRNOG00000021151	Ppp1r14b	629.38	901.249	750.767	537.067	609.386	507.436	760.465	551.296	1.3794	0.464037	0.0019607	0.0445521
ENSRNOG00000007546	Asns	5365.36	4533.16	3869.11	3288.5	3792.87	2900.05	4589.21	3327.14	1.37937	0.464005	0.000445531	0.015044
ENSRNOG00000012956	Tgm2	836.567	876.325	955.17	545.33	612.443	776.888	889.354	644.887	1.37867	0.463275	0.00118107	0.0315751
ENSRNOG00000007939	Naprt1	706.586	658.988	672.3	578.38	475.892	426.797	679.291	493.689	1.37644	0.460945	0.000917964	0.025845
ENSRNOG00000004426	Rps27a	3261.24	2234.18	2188.37	1752.7	1880.13	1953.04	2561.26	1861.95	1.37555	0.460009	0.00134221	0.03446
ENSRNOG00000000610	Cisd1	672.381	766.659	808.891	532.936	561.491	542.838	749.31	545.755	1.37298	0.457313	0.000199521	0.00798673
ENSRNOG00000016411	LOC100360573	2129.53	2368.77	3230.72	1801.24	1925.99	1903.87	2576.34	1877.03	1.37259	0.456902	0.00103005	0.0286167
ENSRNOG00000003302	Flcn	1067.21	1159.46	1202.2	931.605	676.642	889.979	1142.96	832.742	1.37249	0.456796	0.000654761	0.0200618
ENSRNOG00000018242	Camkk1	1299.81	958.075	1016.2	806.634	704.157	875.228	1091.36	795.339	1.37211	0.4564	0.00119461	0.0318229
ENSRNOG00000008843	Eci1	707.564	676.933	800.172	525.706	495.253	572.34	728.223	531.1	1.37107	0.455305	0.000330671	0.0119263
ENSRNOG00000008555	Rps20	2367.99	2791.48	2850.01	1828.09	2093.11	1920.58	2669.83	1947.26	1.37105	0.455281	2.1074e-05	0.00130213
ENSRNOG00000054626	Rps8	6162.84	7214.97	7152.15	4847.03	5108.45	5028.14	6843.32	4994.54	1.37014	0.454327	9.41763e-07	9.54e-05
ENSRNOG00000005698	Ndufa5	476.921	617.116	611.27	378.013	420.863	445.481	568.436	414.786	1.37011	0.454293	0.00202817	0.0457499
ENSRNOG00000002632	Naca	4409.57	4297.88	4151.98	3075.74	2997	3327.83	4286.48	3133.52	1.36787	0.451931	2.19083e-07	2.69617e-05
ENSRNOG00000024213	Golim4	1662.38	1598.12	1528.66	1090.66	1048.59	1366.93	1596.39	1168.73	1.36565	0.449592	0.000193584	0.00776999
ENSRNOG00000008944	Ext2	686.063	678.927	694.581	509.181	519.71	481.867	686.524	503.586	1.36344	0.447255	0.000121053	0.00551255
ENSRNOG00000014856	Etnk1	4581.57	4946.9	4721.6	3194.52	3653.26	3615.97	4750.02	3487.92	1.36179	0.445499	1.23273e-06	0.000120767
ENSRNOG00000001128	Tesc	2740.34	2955.98	3105.75	2081.14	2151.19	2233.31	2934.02	2155.21	1.36131	0.444998	1.59118e-06	0.000147169
ENSRNOG00000024603	Rps15	8334.39	7666.59	8104.41	5150.68	6171.31	6415.72	8035.13	5912.57	1.35895	0.442492	1.32297e-05	0.000891417
ENSRNOG00000009897	Clcnkb	1653.59	1359.85	1663.31	1015.26	1043.5	1383.65	1558.92	1147.47	1.35838	0.441889	0.00142717	0.0358382
ENSRNOG00000026716	Rpl9	5248.09	6185.12	5863.73	3818.34	4526.57	4392.86	5765.65	4245.92	1.35787	0.44135	1.67411e-05	0.00108388
ENSRNOG00000054724	Pycrl	1153.21	963.06	1017.17	748.796	656.262	904.73	1044.48	769.929	1.35635	0.439733	0.00141363	0.0356135
ENSRNOG00000001170	Cox6a1	2173.51	2690.79	2815.13	1985.08	1759.88	1921.57	2559.81	1888.84	1.35522	0.438532	0.000155898	0.00666657
ENSRNOG00000012083	St6galnac2	16284.7	14587.5	14052.4	10833.3	10518.5	11800.8	14974.9	11050.9	1.35507	0.438363	1.99879e-06	0.000176118
ENSRNOG00000020075	Eef1g	7021.88	7471.19	7308.11	4788.16	5462.05	5844.36	7267.06	5364.86	1.3545	0.437765	5.46362e-06	0.000423744
ENSRNOG00000013874	Rplp1	9365.44	7830.1	9515.85	5291.15	7208.69	7222.11	8903.8	6573.98	1.35438	0.437629	0.000628756	0.0195058
ENSRNOG00000003515	Ephx1	1672.16	2220.22	2081.8	1575.05	1222.85	1615.73	1991.39	1471.21	1.35349	0.436681	0.00145161	0.0360868
ENSRNOG00000017127	Rpl28	3137.13	3535.21	3426.4	2294.93	2683.13	2483.09	3366.25	2487.05	1.35347	0.43666	9.36402e-06	0.000667175
ENSRNOG00000013508	Rpl31	2811.69	3279.99	3203.6	2111.09	2335.64	2421.14	3098.42	2289.29	1.35335	0.43653	1.81275e-05	0.00115741
ENSRNOG00000021232	Ddrgk1	899.114	1061.76	1057.86	800.437	754.089	676.581	1006.24	743.702	1.35323	0.436405	0.000340096	0.0122076
ENSRNOG00000048342	Tbca	587.356	603.159	576.395	432.752	470.796	403.195	588.97	435.581	1.35233	0.435444	0.000583414	0.0182897
ENSRNOG00000016896	Rpl3	6033.84	7570.89	7756.64	4579.53	5716.81	5528.69	7120.45	5275.01	1.34981	0.432761	0.000326511	0.0118386
ENSRNOG00000017895	Eno1	5564.73	5930.89	5327.06	4055.89	4216.79	4208.96	5607.56	4160.55	1.34775	0.430557	3.66351e-07	4.26198e-05
ENSRNOG00000001420	Fis1	586.379	621.104	682.956	452.376	519.71	431.714	630.146	467.933	1.34689	0.429627	0.00123597	0.0326327
ENSRNOG00000021177	Cox8a	2652.39	2840.33	3117.38	2205.07	2096.16	2111.36	2870.03	2137.53	1.34273	0.425171	1.01549e-05	0.000713289
ENSRNOG00000042233	Rpl41	8770.27	8626.66	9306.61	6332.23	7070.1	6494.39	8901.18	6632.24	1.34212	0.424512	7.06193e-07	7.56541e-05
ENSRNOG00000028021	LOC684988	625.471	696.873	743.986	462.704	564.548	513.336	688.776	513.529	1.34119	0.423517	0.00135495	0.0345284
ENSRNOG00000051986	Plcg2	501.354	460.594	573.489	390.407	373.988	381.56	511.812	381.985	1.3401	0.42234	0.00225326	0.0491984
ENSRNOG00000020266	Eef2	40173.8	45391.4	41849.2	30861.7	31252.9	33208.5	42471.5	31774.4	1.33665	0.41862	6.08703e-07	6.68228e-05
ENSRNOG00000020674	Rpl27	2394.38	2980.9	2939.13	2017.1	2088.01	2131.03	2771.47	2078.72	1.33321	0.414903	0.000113517	0.00524961
ENSRNOG00000004526	Cox7a2l	1384.83	1501.42	1507.35	1108.22	1065.92	1122.06	1464.53	1098.73	1.33288	0.414549	2.53813e-05	0.00149982
ENSRNOG00000025892	Pkn3	922.569	1082.69	868.952	716.778	765.299	676.581	958.072	719.553	1.33145	0.413003	0.000856721	0.0246189
ENSRNOG00000048509	Ubxn6	429.034	432.679	419.461	331.536	313.864	317.639	427.058	321.013	1.3304	0.411855	0.00221428	0.0484894
ENSRNOG00000028384	Npepl1	561.946	589.201	593.833	416.227	467.739	429.747	581.66	437.904	1.32827	0.409553	0.00103839	0.0286748
ENSRNOG00000020464	Mrpl54	619.607	721.796	776.923	499.886	572.7	523.17	706.109	531.919	1.32748	0.408691	0.00199049	0.0450462
ENSRNOG00000005190	Nipal2	997.821	787.596	997.794	752.927	652.185	695.265	927.737	700.126	1.32531	0.406326	0.00185646	0.0429264
ENSRNOG00000019007	Rpl14	5162.09	5694.61	5877.3	3926.79	4251.43	4448.91	5578	4209.04	1.32519	0.406202	1.38834e-05	0.000921541
ENSRNOG00000010298	Xbp1	12340.3	13120.9	12806.6	8387.54	11024	9496.72	12756	9636.08	1.32376	0.404644	0.000133425	0.00600252
ENSRNOG00000023385	Rpl37a	5609.69	6109.35	6525.38	4353.34	4712.04	4718.36	6081.47	4594.58	1.3236	0.404465	1.11829e-05	0.000770946
ENSRNOG00000001953	Bace2	1311.53	1175.41	1164.42	1015.26	830.517	915.548	1217.12	920.443	1.32241	0.403169	0.000515281	0.0168736
ENSRNOG00000000954	Rpo1-3	659.676	686.903	681.018	567.019	497.291	470.066	675.866	511.459	1.32176	0.40246	0.00126664	0.0330528
ENSRNOG00000026260	Rpl11	4558.12	4282.92	4117.11	3095.37	3399.52	3312.1	4319.38	3268.99	1.32129	0.401943	6.34366e-06	0.000484101
ENSRNOG00000046002	LOC301124	1222.6	1317.98	1321.35	1005.97	910.003	1007	1287.31	974.325	1.32118	0.401824	0.000110383	0.0051527
ENSRNOG00000000177	Ppap2c	1129.76	1171.42	1039.45	892.358	756.128	884.079	1113.54	844.188	1.31895	0.399395	0.000524263	0.0170804
ENSRNOG00000008639	Pabpc1	20192.9	17568.4	17694.9	12292.6	15476.2	14322.3	18485.4	14030.4	1.31752	0.397825	0.000162723	0.00680649
ENSRNOG00000001792	Slc12a8	1367.24	1374.8	1367.85	979.115	1133.17	1014.87	1369.96	1042.39	1.31426	0.394251	0.000136069	0.00608471
ENSRNOG00000000490	Rps10	4111.49	3878.16	3833.27	2869.18	3248.7	2878.42	3940.97	2998.77	1.31422	0.394207	1.88346e-05	0.00118841
ENSRNOG00000055562	Dkc1	686.063	617.116	684.893	517.444	519.71	477.934	662.691	505.029	1.31247	0.39228	0.00126505	0.0330528
ENSRNOG00000005890	Serbp1	2112.92	2640.94	2258.11	1720.68	1947.39	1674.73	2337.32	1780.93	1.3124	0.392208	0.000567839	0.0179526
ENSRNOG00000013061	Tusc3	1342.81	1262.15	1195.42	939.868	1038.4	918.498	1266.79	965.589	1.31199	0.391758	0.00026568	0.0100668
ENSRNOG00000006949	C1qbp	1125.85	1108.62	1022.01	771.518	888.603	823.108	1085.49	827.743	1.3113	0.390999	0.000397793	0.0138078
ENSRNOG00000015845	Fam129b	5863.79	6097.39	6374.26	4320.29	4449.13	5218.92	6111.81	4662.78	1.3107	0.390337	7.38856e-05	0.0036797
ENSRNOG00000005884	Emc7	892.273	1075.72	1021.04	749.828	817.27	720.834	996.344	762.644	1.30647	0.385674	0.00118672	0.0316693
ENSRNOG00000014078	Ndufb8	801.384	860.373	940.639	633.12	703.137	656.913	867.465	664.39	1.30569	0.384808	0.00108439	0.0295744
ENSRNOG00000033473	Rpl36	3640.43	3940.97	4516.23	3086.07	3135.59	3050.51	4032.54	3090.72	1.30476	0.383779	0.000137165	0.0060968
ENSRNOG00000004741	Rpl19	4892.35	5642.77	5431.68	3633.47	4307.48	4309.27	5322.27	4083.41	1.30333	0.382202	0.000192895	0.00776326
ENSRNOG00000004214	Rpl26	5710.35	5181.18	5667.08	3784.26	4338.05	4585.61	5519.54	4235.97	1.30297	0.381802	0.000119537	0.00547698
ENSRNOG00000008628	Ica1	1205.99	1132.54	1121.79	791.141	954.84	909.647	1153.44	885.21	1.30289	0.381714	0.00071391	0.021177
ENSRNOG00000052620	Gnb2l1	5809.06	6230.98	6161.13	4515.5	4491.93	5011.42	6067.06	4672.95	1.29828	0.376602	1.70855e-05	0.00110139
ENSRNOG00000008140	Rpl15	4491.66	4550.11	4357.36	3294.7	3468.81	3578.6	4466.37	3447.37	1.29553	0.373541	7.67618e-06	0.000565871
ENSRNOG00000020308	Ech1	2415.88	2396.68	2209.68	1978.89	1864.84	1577.38	2340.75	1807.04	1.29549	0.373501	0.000615704	0.0192031
ENSRNOG00000001300	P2rx4	2319.13	2274.06	1968.46	1577.12	1656.96	1831.1	2187.22	1688.39	1.29528	0.373269	0.00050191	0.0166088
ENSRNOG00000001611	Rpl24	4374.38	4359.69	4724.5	3324.65	3474.93	3596.3	4486.19	3465.29	1.29458	0.372485	1.57689e-05	0.00103443
ENSRNOG00000011914	Dtnb	1191.33	1041.82	1042.36	820.06	839.689	871.294	1091.83	843.681	1.29406	0.371909	0.000694535	0.020813
ENSRNOG00000060449	AC115322.4	1321.31	1514.38	1592.6	1266.24	1100.56	1059.12	1476.09	1141.98	1.29274	0.37043	0.00155118	0.037743
ENSRNOG00000020607	Bckdha	2319.13	2407.65	2417.95	1680.4	1720.14	2140.87	2381.58	1847.14	1.28916	0.366428	0.00107562	0.0294431
ENSRNOG00000018273	Ncl	3015.94	3174.31	2652.39	2280.47	2372.32	2208.72	2947.55	2287.17	1.28871	0.365929	0.000231324	0.00899387
ENSRNOG00000060775	Lmo7	873.704	943.121	1002.64	764.288	666.452	757.22	939.821	729.32	1.28861	0.365814	0.00173513	0.041143
ENSRNOG00000013545	Polr2e	1901.82	2053.73	1961.68	1428.39	1579.51	1585.24	1972.41	1531.05	1.28815	0.365306	0.000148747	0.00642262
ENSRNOG00000016272	Edf1	1568.56	1488.46	1546.1	1061.74	1239.15	1275.47	1534.37	1192.12	1.28694	0.363948	0.000671301	0.0203592
ENSRNOG00000020595	Rps11	3398.06	3764.51	3696.68	2757.63	2775.86	2907.92	3619.75	2813.81	1.28637	0.363308	3.77762e-05	0.00209117
ENSRNOG00000003549	Cnpy2	1115.1	1219.28	1198.32	855.176	1011.91	891.946	1177.57	919.676	1.2804	0.35659	0.00135043	0.0345008
ENSRNOG00000002194	Coq2	967.525	881.309	963.888	717.811	748.994	734.602	937.574	733.802	1.27775	0.353604	0.00107891	0.029479
ENSRNOG00000015642	Pabpc4	3789.96	3662.82	3390.56	2578.96	3269.08	2642.4	3614.45	2830.15	1.27713	0.352908	0.00149375	0.0368881
ENSRNOG00000005195	Cst3	1929.19	2313.94	2312.36	1781.62	1579.51	1778.97	2185.16	1713.37	1.27532	0.350861	0.00133095	0.03423
ENSRNOG00000010103	Eif4b	4165.24	3907.07	3597.87	2964.2	2893.05	3294.4	3890.06	3050.55	1.27512	0.350637	0.000340215	0.0122076
ENSRNOG00000014710	Prom2	3649.23	4085.53	3694.74	3117.06	3002.09	2869.57	3809.83	2996.24	1.27156	0.346595	0.000136966	0.0060968
ENSRNOG00000016467	Kctd1	973.389	1048.8	1030.73	804.568	755.108	842.776	1017.64	800.817	1.27061	0.345524	0.00132372	0.034152
ENSRNOG00000025936	Rpl6	8239.6	7735.38	8828.05	5536.96	6888.71	7115.9	8267.68	6513.86	1.26922	0.343937	0.00174843	0.0412613
ENSRNOG00000017960	Deaf1	2193.06	1982.95	1878.37	1590.55	1531.62	1649.17	2018.12	1590.44	1.26885	0.343524	0.000599796	0.0187638
ENSRNOG00000020994	Slc25a39	2059.17	2020.83	2033.37	1453.18	1800.64	1574.43	2037.79	1609.42	1.26615	0.34045	0.00123	0.0325326
ENSRNOG00000013895	Npdc1	1798.23	1646.97	1961.68	1333.37	1567.28	1370.86	1802.29	1423.84	1.26588	0.340139	0.00219073	0.0481152
ENSRNOG00000057284	Cenpb	1688.77	2095.6	2069.21	1554.4	1536.71	1546.89	1951.19	1546	1.26207	0.335792	0.00213145	0.0475142
ENSRNOG00000012236	Hddc3	1907.69	1781.56	1751.47	1400.51	1579.51	1342.34	1813.57	1440.79	1.25881	0.332066	0.00132562	0.034152
ENSRNOG00000019974	Uba52	3165.47	3681.76	3814.87	2850.59	2824.78	2825.31	3554.03	2833.56	1.25427	0.326843	0.000830754	0.0240676
ENSRNOG00000012864	Ern1	2930.92	2392.7	2831.6	2182.35	2172.59	2172.34	2718.4	2175.76	1.24946	0.321307	0.00171171	0.0407825
ENSRNOG00000015221	Eif3f	1681.93	1579.18	1599.38	1230.09	1269.72	1391.51	1620.16	1297.11	1.24892	0.320683	0.00125472	0.0330388
ENSRNOG00000048812	Gpx1	3311.08	3639.89	3960.18	2716.32	3171.25	2860.72	3637.05	2916.1	1.24724	0.318737	0.00211173	0.0472159
ENSRNOG00000036852	Pcbp2	1531.43	1380.78	1356.22	1172.25	1143.36	1132.88	1422.81	1149.5	1.23781	0.307793	0.0022797	0.0495576
ENSRNOG00000004616	Npm1	1810.93	1873.28	1648.78	1454.21	1443.98	1428.88	1777.67	1442.36	1.23243	0.301507	0.00185207	0.0428914
ENSRNOG00000056765	RGD1563861	10605.6	10984.5	11935.7	8456.74	9197.85	9661.93	11175.3	9105.51	1.22729	0.295478	0.00110573	0.029955
ENSRNOG00000016064	Tkt	1791.39	1764.61	1795.06	1431.49	1445	1502.64	1783.69	1459.71	1.2219	0.289121	0.00140316	0.0354587
ENSRNOG00000015320	Atp5g2	2445.2	2560.18	2487.7	1962.36	2160.36	2043.51	2497.7	2055.41	1.21515	0.281136	0.00171106	0.0407825
ENSRNOG00000004405	Pigr	16277.9	16311.2	15720.6	13088.9	13200.6	14264.3	16103.2	13517.9	1.19123	0.252451	0.00145029	0.0360868
ENSRNOG00000038436	RGD1307100	1106.3	1046.8	1040.42	1269.34	1338	1322.68	1064.51	1310	-1.23065	-0.299418	0.00227165	0.0494549
ENSRNOG00000004132	Lasp1	2975.87	3374.7	3469.03	4354.38	3931.46	3884.44	3273.2	4056.76	-1.23935	-0.309584	0.0015836	0.0383437
ENSRNOG00000007484	Ehf	5442.57	5424.44	4675.1	6327.07	6587.07	6364.58	5180.7	6426.24	-1.24044	-0.310852	0.00069605	0.020813
ENSRNOG00000002013	Sidt1	2054.28	1930.11	1731.12	2494.26	2281.63	2336.56	1905.17	2370.82	-1.24441	-0.315467	0.0017411	0.041219
ENSRNOG00000017123	B2m	13726.1	16240.4	15741.9	18936.8	20163.7	17810.4	15236.2	18970.3	-1.24508	-0.316241	0.000880881	0.0251287
ENSRNOG00000034254	Actb	6640.74	7217.96	6989.4	8298.72	9467.9	8193.71	6949.37	8653.44	-1.24521	-0.316389	0.0005341	0.0172516
ENSRNOG00000057756	Osbpl2	1117.05	1055.78	1203.16	1437.69	1435.83	1331.53	1125.33	1401.68	-1.2454	-0.316612	0.00214086	0.0475613
ENSRNOG00000000321	Cd24	17083.2	17488.6	18960	20132.8	24439.6	22336	17843.9	22302.8	-1.24988	-0.321793	0.000792249	0.0230869
ENSRNOG00000002735	Dhx9	754.474	775.632	705.237	927.474	994.583	904.73	745.114	942.262	-1.26461	-0.338688	0.00203925	0.0458017
ENSRNOG00000003261	Usp9x	1327.17	1591.14	1496.69	1866.31	1956.56	1788.81	1471.67	1870.56	-1.27105	-0.346026	0.0009392	0.0262888
ENSRNOG00000015415	Rhoq	1904.75	2123.52	2213.55	2467.41	2861.46	2643.39	2080.61	2657.42	-1.27725	-0.353036	0.000565877	0.0179287
ENSRNOG00000005261	Fbxl5	699.745	715.815	703.299	954.327	869.241	891.946	706.286	905.171	-1.28154	-0.35788	0.000934104	0.0261954
ENSRNOG00000039091	Pnpla8	825.817	825.48	918.358	1053.48	1199.41	1044.37	856.551	1099.09	-1.28303	-0.359555	0.00143867	0.0360055
ENSRNOG00000017235	Atp6v0d1	1383.85	1431.63	1436.63	1708.29	1834.27	1927.47	1417.37	1823.34	-1.28653	-0.363489	0.00015876	0.0066807
ENSRNOG00000018294	Hspa5	5007.67	5573.98	5131.37	6199	8006.6	6038.09	5237.68	6747.89	-1.28833	-0.365505	0.00168995	0.0404583
ENSRNOG00000026048	Gbf1	1212.83	1264.14	1308.76	1379.85	1812.87	1694.4	1261.91	1629.04	-1.29102	-0.368509	0.00196567	0.0445521
ENSRNOG00000016281	Col4a1	1741.54	1707.79	1487	2344.51	2179.73	1849.78	1645.44	2124.67	-1.29116	-0.368668	0.00157282	0.038207
ENSRNOG00000008195	Ywhaz	2557.59	3030.75	3125.13	3892.7	3844.84	3516.65	2904.49	3751.4	-1.29155	-0.369102	0.000372271	0.0130346
ENSRNOG00000005082	Irf6	1069.16	1325.95	1216.73	1634.96	1627.41	1417.08	1203.95	1559.82	-1.29554	-0.373554	0.00129629	0.0335705
ENSRNOG00000004185	Mon2	779.884	949.102	871.859	1106.15	1213.68	1057.16	866.948	1125.66	-1.29843	-0.376772	0.00134965	0.0345008
ENSRNOG00000017752	Mccc2	603.97	541.347	573.489	806.634	729.633	697.232	572.936	744.499	-1.29918	-0.3776	0.00179435	0.0422111
ENSRNOG00000012186	Golph3	2606.45	2901.14	2508.05	3396.95	3674.66	3360.29	2671.88	3477.3	-1.30148	-0.380152	6.99771e-05	0.00350851
ENSRNOG00000020411	Sec23ip	458.353	454.612	468.866	615.562	612.443	572.34	460.61	600.115	-1.30269	-0.381496	0.00157932	0.0383024
ENSRNOG00000010260	Dixdc1	568.787	570.259	507.615	696.122	733.709	717.884	548.887	715.905	-1.30442	-0.383411	0.00115759	0.0312276
ENSRNOG00000046889	Dbi	533.605	496.484	464.991	681.662	624.671	644.129	498.36	650.154	-1.30456	-0.383568	0.00180942	0.0424985
ENSRNOG00000021960	AC109958.1	599.083	725.784	696.518	930.572	901.85	807.373	673.795	879.932	-1.30583	-0.384972	0.001846	0.0428841
ENSRNOG00000057880	Myh11	975.343	956.081	834.078	1109.25	1241.19	1300.06	921.834	1216.83	-1.32023	-0.400788	0.000511769	0.0168229
ENSRNOG00000010895	Tmem30a	1609.61	1655.94	1774.72	2066.68	2367.23	2233.31	1680.09	2222.4	-1.32279	-0.403587	4.13995e-05	0.00226647
ENSRNOG00000010737	Mbnl2	1607.65	1638	1678.81	2148.27	2345.83	2023.84	1641.49	2172.65	-1.3235	-0.404364	3.13486e-05	0.00180236
ENSRNOG00000001730	Acap2	404.601	382.831	443.679	556.691	557.415	516.286	410.371	543.464	-1.32401	-0.404911	0.00187138	0.0432043
ENSRNOG00000012881	Fgl2	784.77	898.258	1025.89	1261.08	1173.93	1152.55	902.972	1195.85	-1.32422	-0.405147	0.00091366	0.025845
ENSRNOG00000029237	Klk1c2	97610.5	86250.7	109891	135566	136390	117239	97917.4	129732	-1.32491	-0.405892	0.000145565	0.00635551
ENSRNOG00000034025	Ptprj	930.387	835.449	815.672	1225.96	1099.54	1099.44	860.503	1141.65	-1.32661	-0.407747	0.000243374	0.00942027
ENSRNOG00000015124	Gpam	683.131	797.565	749.798	921.277	1024.14	1015.85	743.498	987.089	-1.32781	-0.409044	0.000363089	0.0128403
ENSRNOG00000009997	Erap1	481.808	545.335	462.085	655.842	687.852	634.295	496.409	659.329	-1.32831	-0.409597	0.00107039	0.0293539
ENSRNOG00000008338	Bsdc1	1300.78	1270.12	1377.54	1665.94	1916.81	1669.82	1316.15	1750.86	-1.33021	-0.411654	6.66418e-05	0.00337538
ENSRNOG00000024671	Dmxl1	545.332	553.311	475.647	678.564	714.347	702.149	524.763	698.353	-1.33098	-0.412486	0.000696022	0.020813
ENSRNOG00000009094	Nudt4	3205.54	3433.52	3809.05	4929.66	4265.7	4714.43	3482.7	4636.6	-1.3313	-0.412835	4.23191e-05	0.00230833
ENSRNOG00000004291	Cltc	2447.15	2948	2816.1	3522.95	3803.06	3609.09	2737.09	3645.03	-1.33175	-0.413325	3.04342e-05	0.00175657
ENSRNOG00000010951	Cmtm6	795.52	955.084	950.326	1280.7	1206.54	1111.24	900.31	1199.5	-1.33222	-0.413827	0.000436419	0.0148712
ENSRNOG00000024190	Rasef	1696.59	1345.89	1512.19	1958.23	2246.98	1867.48	1518.22	2024.23	-1.33318	-0.414866	0.000442122	0.0150311
ENSRNOG00000004621	Rtn4	697.791	785.602	842.797	1202.2	956.878	945.05	775.396	1034.71	-1.33422	-0.416	0.00168479	0.0403998
ENSRNOG00000012989	Serinc2	611.788	469.566	531.834	732.271	705.176	719.851	537.73	719.099	-1.33712	-0.419127	0.00135878	0.0345284
ENSRNOG00000009856	Sypl1	656.744	581.226	630.644	797.338	956.878	750.336	622.871	834.851	-1.34011	-0.422352	0.00117299	0.0314192
ENSRNOG00000049279	LOC100911764	9587.29	13114	12558.6	17015.7	17396	13018.3	11753.3	15810	-1.34514	-0.427762	0.00155004	0.037743
ENSRNOG00000036816	Wls	2788.23	3247.09	2810.29	4205.65	3840.76	3874.61	2948.54	3973.67	-1.3477	-0.430501	1.01193e-05	0.000713289
ENSRNOG00000012192	Znf740	653.812	619.11	623.863	884.095	834.594	841.792	632.262	853.494	-1.34982	-0.432768	7.84138e-05	0.00387159
ENSRNOG00000026833	Ube4a	833.635	957.078	1041.39	1120.61	1317.62	1394.46	944.033	1277.56	-1.35343	-0.436624	0.000545859	0.0174055
ENSRNOG00000018485	Gpr155	2766.73	2846.31	2250.36	3328.78	3661.41	3673.01	2621.13	3554.4	-1.35614	-0.439508	6.11956e-05	0.00315963
ENSRNOG00000028341	Alkbh5	684.108	722.793	704.268	1056.58	887.584	923.415	703.723	955.858	-1.35819	-0.441684	0.000137568	0.0060968
ENSRNOG00000015420	Stxbp1	289.28	301.081	343.9	446.179	420.863	402.212	311.42	423.085	-1.35823	-0.441731	0.00214832	0.0475613
ENSRNOG00000000583	Cdk19	460.307	439.658	443.679	657.907	561.491	610.693	447.881	610.03	-1.36194	-0.445666	0.000416598	0.0142284
ENSRNOG00000028358	Edem3	683.131	871.34	682.956	927.474	1134.19	994.22	745.809	1018.63	-1.366	-0.449959	0.000865727	0.0247914
ENSRNOG00000006803	Dnajc10	982.184	1194.35	893.171	1536.84	1395.07	1268.59	1023.24	1400.16	-1.3684	-0.45249	0.000528907	0.0171216
ENSRNOG00000051408	Magt1	1538.27	1753.65	1952.96	2071.84	2728.99	2416.22	1748.29	2405.68	-1.37603	-0.460514	0.000270855	0.0101851
ENSRNOG00000023546	Hspb1	364.532	329.993	411.711	555.658	455.511	515.303	368.745	508.824	-1.37959	-0.464238	0.00150366	0.03701
ENSRNOG00000015496	Tpm4	713.427	705.845	830.203	963.623	1170.88	972.585	749.825	1035.69	-1.38109	-0.465808	0.000221989	0.00867623
ENSRNOG00000013251	Trim24	375.282	346.941	288.682	471.999	473.854	454.332	336.968	466.728	-1.38517	-0.470058	0.00125579	0.0330388
ENSRNOG00000039300	Ahcyl2	390.919	425.7	404.93	640.349	525.825	529.07	407.183	565.081	-1.3876	-0.472597	0.000553493	0.0176112
ENSRNOG00000026504	Fam114a1	342.054	404.764	302.244	479.229	522.767	454.332	349.688	485.443	-1.38843	-0.473453	0.0017185	0.0408789
ENSRNOG00000021573	Dpy19l3	720.268	861.37	798.235	1177.42	1194.31	933.249	793.291	1101.66	-1.38858	-0.473606	0.000286906	0.0106277
ENSRNOG00000010747	Dap	1056.46	1106.62	1073.35	1295.16	1742.56	1462.32	1078.81	1500.01	-1.39048	-0.475583	0.00010445	0.00490651
ENSRNOG00000021298	Dstyk	591.265	583.219	572.52	789.076	785.68	855.56	582.335	810.105	-1.3913	-0.476432	2.32741e-05	0.00140291
ENSRNOG00000050636	Arhgef10l	715.382	805.541	858.296	1128.87	1162.72	1024.71	793.073	1105.43	-1.39371	-0.478933	3.9414e-05	0.00217375
ENSRNOG00000017864	Bdp1	361.6	370.868	412.68	427.588	583.91	586.108	381.716	532.535	-1.39534	-0.480619	0.00209178	0.0469106
ENSRNOG00000004563	Sec24a	348.895	411.743	354.556	474.065	554.358	531.037	371.731	519.82	-1.39872	-0.484111	0.00052443	0.0170804
ENSRNOG00000002389	Morf4l2	774.02	1012.91	1031.7	1253.85	1469.46	1223.35	939.542	1315.55	-1.40018	-0.485612	0.000305221	0.0112223
ENSRNOG00000009161	Clasp2	391.896	452.618	415.586	574.249	634.862	555.622	420.034	588.244	-1.4005	-0.485945	0.000207028	0.00822094
ENSRNOG00000003350	Mospd2	322.508	335.974	311.932	493.689	402.521	463.183	323.471	453.131	-1.40091	-0.486361	0.000677376	0.02046
ENSRNOG00000007584	Ehd4	748.61	1108.62	989.075	1387.08	1327.81	1275.47	948.767	1330.12	-1.402	-0.487484	0.000449205	0.0150996
ENSRNOG00000007804	C1galt1	1312.51	1206.32	1028.79	1672.14	1693.64	1616.71	1182.54	1660.83	-1.40449	-0.49005	1.39243e-05	0.000921541
ENSRNOG00000014365	Gne	1278.31	1628.03	1483.13	2581.02	1715.04	1873.38	1463.15	2056.48	-1.40546	-0.491042	0.00103985	0.0286748
ENSRNOG00000050834	Fam102a	664.562	603.159	557.021	977.049	813.194	778.855	608.247	856.366	-1.40773	-0.493369	0.000190104	0.00769251
ENSRNOG00000006756	Maged1	1395.58	1096.65	1215.76	1707.25	1742.56	1774.06	1236	1741.29	-1.40876	-0.494421	9.23997e-06	0.000661502
ENSRNOG00000011305	Sox10	2023.01	1938.08	1882.25	3075.74	2521.1	2668.95	1947.78	2755.27	-1.41451	-0.500307	1.29569e-06	0.000124602
ENSRNOG00000008422	Lpo	11008.3	13654.3	11286.7	17679.8	18026.8	15159.1	11983.1	16955.3	-1.41493	-0.500734	4.58703e-06	0.000368296
ENSRNOG00000002750	Rc3h1	328.372	311.05	319.681	490.59	436.149	432.697	319.701	453.145	-1.41713	-0.502973	0.000258784	0.00985562
ENSRNOG00000003687	Rgs2	580.515	661.979	623.863	1031.79	813.194	804.423	622.119	883.135	-1.4194	-0.50528	0.000156244	0.00666657
ENSRNOG00000020179	Nt5c2	361.6	380.837	329.369	539.133	492.196	490.718	357.269	507.349	-1.42012	-0.506014	0.000175323	0.00717233
ENSRNOG00000012346	Epb41l2	229.665	255.221	202.465	304.682	318.959	352.058	229.117	325.233	-1.42014	-0.506037	0.00193131	0.0443814
ENSRNOG00000020578	Ceacam1	895.205	1007.92	861.203	1430.46	1097.51	1403.32	921.443	1310.43	-1.42229	-0.508211	8.28876e-05	0.00404681
ENSRNOG00000009795	Nfib	465.194	434.673	457.241	657.907	646.071	627.411	452.369	643.796	-1.42299	-0.508927	2.05629e-05	0.00127989
ENSRNOG00000042855	Ahdc1	452.489	484.521	392.336	712.647	624.671	565.456	443.115	634.258	-1.43127	-0.517297	0.000270594	0.0101851
ENSRNOG00000048205	Ube2h	2952.42	2694.77	2893.6	4116.83	3941.65	4175.53	2846.93	4078	-1.4324	-0.518433	1.9329e-09	4.79714e-07
ENSRNOG00000026226	Hook1	648.926	722.793	748.83	1028.69	995.602	1019.79	706.85	1014.69	-1.43551	-0.521563	2.29882e-06	0.000200186
ENSRNOG00000019180	Acsl4	231.62	312.047	294.494	399.702	361.759	441.548	279.387	401.003	-1.43568	-0.521737	0.00148293	0.0367389
ENSRNOG00000020644	Nsg2	1144.42	873.334	1117.92	1301.36	1784.34	1419.05	1045.22	1501.58	-1.4365	-0.522553	0.000277394	0.0104047
ENSRNOG00000061603	Asxl1	213.051	206.37	219.902	321.208	315.902	282.236	213.108	306.449	-1.43758	-0.52364	0.000918138	0.025845
ENSRNOG00000006197	Calu	748.61	809.529	791.454	1201.17	1116.87	1060.11	783.197	1126.05	-1.43764	-0.523706	1.2696e-06	0.000123566
ENSRNOG00000003721	Paqr4	185.687	239.27	220.871	305.715	320.998	304.855	215.276	310.522	-1.44262	-0.528694	0.00130852	0.0338285
ENSRNOG00000006642	Yipf6	1113.14	1507.4	1401.75	1698.99	2110.43	2009.09	1340.77	1939.5	-1.44668	-0.53275	5.21699e-05	0.00278445
ENSRNOG00000014066	Jade1	1502.11	1610.08	1518	2093.53	2533.33	2078.91	1543.4	2235.26	-1.44827	-0.534326	8.43088e-07	8.77931e-05
ENSRNOG00000008451	Fut8	325.44	307.063	313.869	532.936	412.711	426.797	315.457	457.481	-1.44986	-0.535917	0.000377517	0.0131654
ENSRNOG00000001518	Itga6	2543.91	2622	2620.42	3980.49	4100.62	3219.66	2595.44	3766.92	-1.45127	-0.537319	6.14782e-07	6.68228e-05
ENSRNOG00000026542	Suco	309.803	307.063	314.838	453.409	479.968	421.88	310.568	451.752	-1.45436	-0.540388	8.12287e-05	0.00397887
ENSRNOG00000053583	Mapk3	1331.08	1244.2	1420.16	1978.89	2031.97	1806.51	1331.81	1939.12	-1.45582	-0.54183	1.08659e-07	1.46092e-05
ENSRNOG00000024503	Nbas	809.202	703.851	704.268	929.539	1223.87	1084.69	739.107	1079.37	-1.46041	-0.546378	2.77033e-05	0.0016151
ENSRNOG00000016562	Zfp191	299.053	329.993	322.588	452.376	483.025	456.299	317.211	463.9	-1.46248	-0.548422	5.05973e-05	0.00271023
ENSRNOG00000011951	Plk2	197.414	189.422	198.59	288.157	283.293	285.187	195.142	285.546	-1.46316	-0.549086	0.000540485	0.0173456
ENSRNOG00000014076	Mbnl1	231.62	193.41	209.246	297.453	334.245	296.988	211.425	309.562	-1.4639	-0.549821	0.000715762	0.0211897
ENSRNOG00000033051	Slc22a15	236.506	194.406	224.746	351.159	274.122	336.324	218.553	320.535	-1.46641	-0.552289	0.0012268	0.0325058
ENSRNOG00000009899	Skil	232.597	197.397	177.278	332.569	283.293	275.353	202.424	297.071	-1.46731	-0.55317	0.00164967	0.0396853
ENSRNOG00000026962	Osbpl8	236.506	275.16	278.995	358.389	420.863	381.56	263.554	386.938	-1.46823	-0.554082	0.000285729	0.0106105
ENSRNOG00000052070	Aldh1a3	428.056	418.722	507.615	677.531	681.738	630.361	451.465	663.21	-1.46868	-0.554516	2.06282e-05	0.00127989
ENSRNOG00000015517	Zfp444	304.917	246.248	273.182	358.389	456.53	400.245	274.782	405.055	-1.47398	-0.559719	0.000444701	0.015044
ENSRNOG00000013166	Wnt4	257.029	289.117	282.87	448.245	462.644	314.689	276.339	408.526	-1.47787	-0.563518	0.00122247	0.0324489
ENSRNOG00000034272	Pias1	141.708	162.504	166.622	222.057	222.151	251.751	156.945	231.986	-1.4785	-0.564138	0.00176931	0.0416881
ENSRNOG00000018574	Qsox2	290.257	335.974	391.368	499.886	498.31	516.286	339.2	504.827	-1.48821	-0.573582	9.84484e-05	0.00468369
ENSRNOG00000012799	Prkaa1	175.914	181.446	164.684	263.37	268.007	245.851	174.015	259.076	-1.48879	-0.574139	0.00063674	0.0196308
ENSRNOG00000014493	Golga1	274.621	285.13	250.902	413.129	371.95	425.813	270.217	403.63	-1.49406	-0.579234	8.01601e-05	0.00393948
ENSRNOG00000016090	Mtmr10	444.67	522.405	490.178	772.551	714.347	691.332	485.751	726.076	-1.49471	-0.579867	3.25525e-06	0.000278048
ENSRNOG00000023238	Dgkd	553.151	433.676	529.896	728.139	836.632	704.116	505.574	756.296	-1.49559	-0.580714	2.33645e-05	0.00140291
ENSRNOG00000008987	Rnf139	511.127	653.006	607.395	839.684	887.584	923.415	590.509	883.561	-1.49651	-0.581606	4.49758e-06	0.000365976
ENSRNOG00000054011	Tbc1d8b	516.99	513.433	503.741	657.907	831.536	807.373	511.388	765.606	-1.49734	-0.582405	7.45216e-06	0.000554851
ENSRNOG00000006328	Wwp1	672.381	652.009	603.52	862.406	1034.33	990.286	642.637	962.339	-1.49767	-0.582721	1.13122e-06	0.000111557
ENSRNOG00000004645	Galnt5	365.509	467.573	432.054	499.886	770.394	628.394	421.712	632.891	-1.50098	-0.585903	0.00052534	0.0170804
ENSRNOG00000005388	Rassf3	1646.75	1514.38	1600.34	2335.21	2688.23	2131.03	1587.16	2384.82	-1.50246	-0.587322	8.39194e-08	1.16789e-05
ENSRNOG00000001255	Mlxip	688.995	739.742	621.926	993.574	990.507	1102.39	683.554	1028.83	-1.50544	-0.590183	4.69156e-07	5.374e-05
ENSRNOG00000007793	Pnrc1	591.265	775.632	588.989	1104.09	960.955	881.129	651.962	982.056	-1.50635	-0.591061	3.47942e-05	0.00195095
ENSRNOG00000055365	Edem1	943.092	904.239	932.889	1232.16	1458.25	1497.72	926.74	1396.04	-1.50654	-0.591239	1.24897e-07	1.61725e-05
ENSRNOG00000016807	Oat	3253.42	5358.64	4673.16	6363.21	7200.54	6453.09	4428.41	6672.28	-1.50672	-0.591414	5.70796e-05	0.00298236
ENSRNOG00000054058	Osbpl1a	579.538	664.97	614.176	953.294	998.659	858.51	619.561	936.821	-1.51202	-0.596473	5.34828e-07	5.98807e-05
ENSRNOG00000007060	Plin2	228.688	246.248	273.182	373.881	461.625	297.971	249.373	377.826	-1.5146	-0.598932	0.00105052	0.0289154
ENSRNOG00000014872	Sec24d	547.287	603.159	620.957	766.354	1066.93	853.593	590.467	895.627	-1.51682	-0.601051	2.13857e-05	0.00131593
ENSRNOG00000005935	A3galt2	369.419	286.126	352.618	524.673	527.863	478.917	336.054	510.484	-1.51856	-0.602706	3.6165e-05	0.00200945
ENSRNOG00000010944	Hyou1	1374.08	1654.95	1610.03	2088.37	2860.44	2112.35	1546.35	2353.72	-1.5221	-0.606063	7.28126e-06	0.000544851
ENSRNOG00000022753	Mast3	151.481	197.397	239.277	316.043	298.579	282.236	196.052	298.953	-1.52451	-0.608345	0.00135857	0.0345284
ENSRNOG00000008243	Slc43a1	531.65	593.189	513.428	776.682	904.907	818.191	546.089	833.26	-1.52607	-0.609819	7.42637e-07	7.86116e-05
ENSRNOG00000001633	Tfg	396.783	317.032	360.368	439.982	677.661	522.187	358.061	546.61	-1.52648	-0.610211	0.000406252	0.0139389
ENSRNOG00000022943	Dgka	199.369	192.413	192.778	324.306	289.407	279.286	194.853	297.667	-1.5273	-0.610985	0.000162016	0.00679601
ENSRNOG00000012942	Satb1	548.264	391.804	481.46	751.894	653.205	770.987	473.843	725.362	-1.53065	-0.614144	2.97596e-05	0.00172432
ENSRNOG00000004084	Fam84a	487.672	519.414	447.554	862.406	692.947	672.647	484.88	742.667	-1.53152	-0.614964	9.04847e-06	0.000654081
ENSRNOG00000002418	Tgfb2	4507.3	2641.93	4461.98	6466.5	5979.73	5347.74	3870.4	5931.32	-1.53241	-0.615801	0.00015767	0.0066807
ENSRNOG00000018689	RGD1305464	1011.5	1263.14	1115.98	1679.37	1864.84	1685.55	1130.21	1743.25	-1.54251	-0.625283	3.29694e-08	5.39503e-06
ENSRNOG00000010154	Zc3hc1	554.128	501.469	366.181	762.222	610.405	829.008	473.926	733.878	-1.54881	-0.631162	0.000189532	0.00769251
ENSRNOG00000017428	Map1b	263.87	208.364	216.996	372.849	409.654	286.17	229.743	356.224	-1.54992	-0.632198	0.000501777	0.0166088
ENSRNOG00000054515	Fgd6	340.1	329.993	311.932	589.741	453.473	480.884	327.341	508.033	-1.55178	-0.633923	1.95944e-05	0.00122597
ENSRNOG00000030021	Ccl6	387.987	240.266	296.432	382.144	581.872	471.05	308.229	478.355	-1.5518	-0.633945	0.00135075	0.0345008
ENSRNOG00000017854	Ucp2	1704.41	1651.96	1837.68	3129.45	2710.65	2231.34	1731.35	2690.48	-1.5538	-0.635797	3.57881e-07	4.19622e-05
ENSRNOG00000005175	Sgpp1	736.882	941.127	880.577	1358.16	1360.42	1263.67	852.862	1327.42	-1.55645	-0.638259	7.36726e-08	1.0862e-05
ENSRNOG00000018225	Tp53inp2	1009.55	1357.85	1376.57	1861.14	2170.55	1816.34	1247.99	1949.35	-1.56198	-0.643375	1.4118e-06	0.000134763
ENSRNOG00000057713	Cav2	684.108	558.296	883.483	939.868	1342.08	1043.39	708.629	1108.44	-1.56399	-0.645235	0.000172138	0.00710059
ENSRNOG00000023972	Col4a2	708.541	732.763	702.331	1177.42	1195.33	980.452	714.545	1117.73	-1.56406	-0.645297	4.13858e-08	6.62662e-06
ENSRNOG00000010274	Smc4	121.185	147.55	120.123	191.072	203.808	213.398	129.619	202.759	-1.56501	-0.646174	0.000851219	0.0245343
ENSRNOG00000042561	Cks1b	112.389	144.559	127.873	176.612	239.474	186.846	128.274	200.978	-1.56703	-0.648032	0.00196454	0.0445521
ENSRNOG00000013694	Ntng2	104.571	98.6987	132.716	173.514	181.389	173.079	111.995	175.994	-1.57085	-0.651542	0.00181607	0.0425355
ENSRNOG00000032708	RT1-Bb	202.301	177.458	214.09	338.765	274.122	320.589	197.95	311.159	-1.57156	-0.652202	0.000122849	0.00557725
ENSRNOG00000000054	Abhd8	127.049	143.562	138.529	267.501	201.77	174.062	136.38	214.444	-1.57171	-0.652335	0.00203532	0.0457825
ENSRNOG00000060665	Afap1	320.554	279.148	318.713	519.509	438.187	488.751	306.138	482.149	-1.57466	-0.655045	4.98612e-06	0.000392848
ENSRNOG00000001823	St6gal1	3425.43	2977.91	2778.32	4746.85	5170.61	4560.04	3060.55	4825.83	-1.57677	-0.656968	2.97096e-10	9.73793e-08
ENSRNOG00000006116	Hk2	137.799	242.26	211.184	339.798	268.007	324.523	197.081	310.776	-1.57723	-0.657393	0.0017306	0.0411011
ENSRNOG00000012495	Podxl	313.713	383.828	359.399	634.152	616.519	420.896	352.313	557.189	-1.58114	-0.660969	0.000126842	0.00574103
ENSRNOG00000004276	Itga3	304.917	301.081	322.588	556.691	495.253	416.963	309.528	489.636	-1.5813	-0.66111	1.20252e-05	0.000817659
ENSRNOG00000006170	Bach2	281.462	198.394	319.681	425.523	409.654	436.631	266.513	423.936	-1.59017	-0.669177	0.000168422	0.00696657
ENSRNOG00000054891	Cnot6	262.893	266.187	267.37	400.735	397.426	473.017	265.483	423.726	-1.59646	-0.674879	4.6003e-06	0.000368296
ENSRNOG00000018243	Ubfd1	337.168	284.133	292.557	483.361	525.825	457.282	304.619	488.822	-1.60442	-0.682054	1.8933e-06	0.000168821
ENSRNOG00000012951	Kctd9	204.255	197.397	219.902	376.98	325.074	296.988	207.185	333.014	-1.60666	-0.684062	3.44763e-05	0.00194465
ENSRNOG00000014061	Dusp5	411.442	315.038	382.649	705.417	740.842	349.108	369.71	598.456	-1.61816	-0.694355	0.00209702	0.0469574
ENSRNOG00000028137	Mki67	137.799	121.629	146.278	161.12	229.284	269.452	135.235	219.952	-1.62699	-0.702209	0.00154279	0.0376617
ENSRNOG00000003219	Trim16	335.213	374.856	412.68	652.743	598.176	581.191	374.249	610.703	-1.63153	-0.706228	1.92905e-07	2.41391e-05
ENSRNOG00000009712	Gale	170.05	245.251	279.963	359.422	463.663	311.739	231.755	378.275	-1.63191	-0.706557	0.00066065	0.0202007
ENSRNOG00000046257	Ctdspl	608.856	576.241	659.706	1095.82	1018.02	911.614	614.935	1008.49	-1.63959	-0.713337	3.60307e-09	8.51641e-07
ENSRNOG00000009005	Slco2a1	205.233	209.361	337.119	441.015	450.416	346.158	250.571	412.529	-1.64561	-0.718622	0.000410431	0.01405
ENSRNOG00000008277	Bag1	534.582	557.299	626.769	844.848	1159.67	825.075	572.883	943.197	-1.64621	-0.719151	1.52762e-06	0.000143067
ENSRNOG00000020865	Ano1	2793.12	3171.32	3081.54	5281.85	4773.18	4882.59	3015.32	4979.21	-1.6513	-0.723601	5.25353e-15	3.55592e-12
ENSRNOG00000017307	Prss23	1900.84	2262.09	1576.13	4182.93	2421.24	2885.3	1913.02	3163.16	-1.65349	-0.725517	3.17182e-05	0.00180964
ENSRNOG00000013912	Slc30a7	490.603	553.311	526.021	690.958	1019.04	891.946	523.312	867.314	-1.65758	-0.729079	1.08977e-06	0.000108185
ENSRNOG00000003174	Tapt1	459.33	579.232	445.617	892.358	792.813	777.871	494.726	821.014	-1.65971	-0.730933	1.08899e-07	1.46092e-05
ENSRNOG00000027728	Ibtk	509.172	596.18	520.209	870.669	1021.08	812.29	541.854	901.346	-1.66348	-0.734203	2.51012e-08	4.24752e-06
ENSRNOG00000029514	Slc26a9	516.99	273.166	409.774	721.942	620.595	668.714	399.977	670.417	-1.67576	-0.744818	8.58924e-05	0.0041662
ENSRNOG00000002449	Maged2	348.895	357.907	309.994	572.183	613.462	523.17	338.932	569.605	-1.68058	-0.748956	4.64712e-08	7.20836e-06
ENSRNOG00000026371	Krt17	136.822	127.61	119.154	231.352	219.094	197.664	127.862	216.036	-1.68926	-0.756394	6.29377e-05	0.00322064
ENSRNOG00000051704	Zfp185	152.458	106.674	103.654	254.074	194.637	167.178	120.929	205.296	-1.69681	-0.762829	0.00110639	0.029955
ENSRNOG00000007467	Ace	320.554	361.895	268.339	571.15	513.596	535.954	316.929	540.234	-1.70496	-0.769737	2.27524e-07	2.7771e-05
ENSRNOG00000011573	Csad	306.871	370.868	344.869	756.025	495.253	493.668	340.869	581.649	-1.70607	-0.770679	1.74292e-05	0.0011187
ENSRNOG00000003749	Xk	162.231	153.531	142.404	277.829	293.483	211.432	152.722	260.915	-1.70785	-0.772184	5.43042e-05	0.00286753
ENSRNOG00000013973	Lcn2	95.7752	161.507	125.935	179.711	246.608	228.149	127.739	218.156	-1.70872	-0.772918	0.000721471	0.0212909
ENSRNOG00000008810	Nsmf	129.003	125.617	134.654	286.092	162.027	221.266	129.758	223.128	-1.71916	-0.781704	0.000538779	0.0173282
ENSRNOG00000029726	Gstm1	216.96	181.446	174.372	280.927	468.758	236.017	190.926	328.567	-1.72053	-0.782857	0.000851807	0.0245343
ENSRNOG00000013213	Epha4	124.117	95.7078	128.841	218.958	207.884	177.012	116.222	201.285	-1.7307	-0.791358	0.000143861	0.00631929
ENSRNOG00000017195	Ctr9	790.634	762.672	804.047	1208.4	1555.05	1337.43	785.784	1366.96	-1.73959	-0.798751	2.58333e-11	1.03969e-08
ENSRNOG00000003781	Atp10b	156.368	95.7078	82.3422	191.072	220.113	177.996	111.473	196.393	-1.76154	-0.81684	0.00103242	0.028629
ENSRNOG00000008635	Mks1	84.0476	88.7291	53.2802	131.168	140.627	126.859	75.3523	132.885	-1.76431	-0.819103	0.00138229	0.035066
ENSRNOG00000025604	Atad2	112.389	112.656	74.5923	171.448	175.275	185.863	99.8792	177.529	-1.77837	-0.830554	0.00021663	0.00848904
ENSRNOG00000025416	Dpy19l4	193.505	186.431	227.652	324.306	440.225	321.573	202.529	362.035	-1.78707	-0.837595	3.79187e-06	0.000317218
ENSRNOG00000019093	Nrg2	92.8433	92.7169	57.1552	178.678	123.304	131.776	80.9051	144.586	-1.7873	-0.837783	0.00163512	0.039399
ENSRNOG00000050123	Gdf5	412.42	502.466	492.116	815.929	986.431	719.851	469	840.737	-1.79247	-0.841949	1.04805e-08	2.00083e-06
ENSRNOG00000053979	Egf	6893.86	6741.42	9141.92	15853.8	14664	10557.8	7592.4	13691.9	-1.80332	-0.850653	1.23285e-08	2.27679e-06
ENSRNOG00000002609	Ero1lb	1045.71	1061.76	1048.17	1680.4	2023.81	1990.41	1051.88	1898.21	-1.80473	-0.851785	1.98495e-15	1.40752e-12
ENSRNOG00000019630	Hacl1	98.7071	95.7078	104.623	254.074	166.103	119.975	99.6793	180.051	-1.80498	-0.851983	0.00146396	0.036333
ENSRNOG00000001250	Lfng	107.503	122.626	116.248	221.024	230.303	177.996	115.459	209.774	-1.81642	-0.861099	1.84689e-05	0.0011703
ENSRNOG00000021237	RGD1565616	315.667	248.242	292.557	502.984	424.94	640.195	285.489	522.706	-1.83113	-0.87273	6.14299e-07	6.68228e-05
ENSRNOG00000018666	Gpsm1	182.755	162.504	172.434	376.98	314.883	262.568	172.564	318.144	-1.84273	-0.881846	1.57211e-06	0.000146315
ENSRNOG00000017601	Srd5a1	74.2746	96.7048	92.0295	154.923	172.218	160.295	87.6696	162.479	-1.85362	-0.890348	5.05097e-05	0.00271023
ENSRNOG00000024207	Fgfrl1	54.7287	50.8448	65.8738	131.168	93.7517	101.29	57.1491	108.737	-1.9014	-0.927064	0.000691621	0.0208059
ENSRNOG00000017403	Apobr	169.073	130.601	243.152	370.783	367.873	307.805	180.942	348.82	-1.92663	-0.946078	8.87884e-06	0.00064495
ENSRNOG00000050404	Pmepa1	172.004	131.598	128.841	238.582	389.273	212.415	144.148	280.09	-1.94261	-0.957993	6.35988e-05	0.00324332
ENSRNOG00000009734	Akr1b8	44.9557	54.8326	72.6549	126.004	109.037	100.307	57.4811	111.783	-1.94347	-0.958635	0.000528087	0.0171216
ENSRNOG00000001984	Kcne1	211.096	283.136	345.837	421.391	553.339	664.78	280.023	546.503	-1.95195	-0.964919	1.60956e-06	0.000147951
ENSRNOG00000008425	Nav1	128.026	168.486	173.403	370.783	289.407	260.602	156.638	306.931	-1.95892	-0.970056	1.08541e-06	0.000108185
ENSRNOG00000006987	Tmem263	143.663	220.327	191.809	373.881	384.178	335.34	185.266	364.467	-1.96748	-0.976349	9.05884e-08	1.24903e-05
ENSRNOG00000049162	Prr15l	253.12	210.358	213.121	431.719	493.215	408.112	225.533	444.349	-1.96986	-0.978095	4.37671e-10	1.27791e-07
ENSRNOG00000016299	Klf4	123.14	89.7261	114.31	189.006	212.979	244.867	109.059	215.618	-1.97706	-0.983358	3.0195e-06	0.000259904
ENSRNOG00000016872	Lppr4	383.101	445.64	427.211	895.456	769.375	820.158	418.65	828.33	-1.97861	-0.984485	7.45576e-15	4.82712e-12
ENSRNOG00000020918	Ccnd1	484.74	684.909	707.174	1224.93	1357.36	1131.9	625.608	1238.06	-1.97892	-0.984715	2.84984e-11	1.11676e-08
ENSRNOG00000021611	Clip2	369.419	560.289	369.087	1061.74	894.717	621.51	432.932	859.323	-1.9849	-0.989068	7.51348e-07	7.8791e-05
ENSRNOG00000047247	Ptprs	182.755	178.455	207.309	431.719	380.102	318.622	189.506	376.815	-1.98744	-0.990914	8.70312e-09	1.77532e-06
ENSRNOG00000029784	Pak1	131.935	80.7535	84.2797	204.499	217.055	176.029	98.9894	199.194	-2.0115	-1.00827	1.81877e-05	0.00115741
ENSRNOG00000003300	Btg2	177.868	275.16	307.088	749.828	381.121	415.979	253.372	515.643	-2.03471	-1.02482	3.27993e-05	0.00186418
ENSRNOG00000007591	Slc45a3	99.6844	84.7413	149.185	245.812	256.798	182.913	111.203	228.507	-2.05318	-1.03786	1.64932e-05	0.00107249
ENSRNOG00000010515	Trim59	33.2281	28.9117	38.7493	79.5273	65.2185	63.9212	33.6297	69.5557	-2.06661	-1.04727	0.00140492	0.0354587
ENSRNOG00000029134	Adgrl1	45.933	51.8417	65.8738	148.726	72.3518	118.992	54.5495	113.357	-2.07736	-1.05475	0.000774737	0.0226652
ENSRNOG00000045829	Thbs1	534.582	357.907	564.771	1410.83	699.061	972.585	485.753	1027.49	-2.11509	-1.08072	0.00183889	0.0428528
ENSRNOG00000059613	AABR07065780.1	43.0011	23.927	62.9676	68.1662	103.942	106.207	43.2985	92.7719	-2.14127	-1.09847	0.00214984	0.0475613
ENSRNOG00000002305	Slc15a2	101.639	100.693	99.7794	208.63	246.608	192.747	100.704	215.995	-2.14445	-1.10061	4.6059e-08	7.20836e-06
ENSRNOG00000015888	Larp4b	632.312	830.465	629.676	1743.4	1612.12	1147.63	697.484	1501.05	-2.15207	-1.10572	8.60279e-12	4.13239e-09
ENSRNOG00000009448	Papln	107.503	134.589	153.06	300.551	286.35	264.535	131.717	283.812	-2.15418	-1.10714	5.11344e-09	1.13648e-06
ENSRNOG00000052415	Gstt2	66.4562	43.8661	71.6862	197.269	103.942	91.4564	60.6695	130.889	-2.15507	-1.10773	0.000723472	0.0212909
ENSRNOG00000011271	Mcc	21.5005	51.8417	40.6867	90.8883	68.2757	87.5228	38.0097	82.2289	-2.16476	-1.1142	0.00151178	0.037084
ENSRNOG00000002583	Serpinb11	84.0476	51.8417	99.7794	181.777	183.427	153.411	78.5562	172.872	-2.1985	-1.13652	9.09745e-06	0.000654445
ENSRNOG00000019656	Btd	158.322	224.315	150.153	453.409	391.311	326.49	177.597	390.403	-2.19859	-1.13658	7.5763e-09	1.61169e-06
ENSRNOG00000013552	Scd1	46.9103	127.61	72.6549	268.534	127.38	147.51	82.3919	181.141	-2.19907	-1.13689	0.000968629	0.027011
ENSRNOG00000007597	Rhpn1	118.253	57.8235	117.217	238.582	226.227	190.78	97.7643	218.53	-2.23336	-1.15921	6.37189e-06	0.000484101
ENSRNOG00000009588	Snph	67.4335	111.659	102.686	270.599	182.408	177.012	93.9261	210.007	-2.23555	-1.16063	4.17319e-06	0.000345238
ENSRNOG00000001227	Adarb1	111.412	142.565	148.216	324.306	320.998	273.386	134.064	306.23	-2.28377	-1.19142	1.33049e-10	4.50279e-08
ENSRNOG00000004057	Ccdc88a	39.0919	33.8965	32.9369	86.757	77.447	78.6722	35.3084	80.9587	-2.29253	-1.19694	8.95052e-05	0.00431334
ENSRNOG00000029394	Dusp8	42.0238	48.8509	31.9681	142.529	73.3709	65.888	40.9476	93.9294	-2.29328	-1.19741	0.00082864	0.0240654
ENSRNOG00000007748	Tex15	152.458	127.61	136.591	365.619	383.159	211.432	138.887	320.07	-2.30337	-1.20375	1.10472e-07	1.46879e-05
ENSRNOG00000012609	Trdn	156.368	78.7596	77.4985	170.416	388.254	163.245	104.209	240.638	-2.30867	-1.20706	0.000323551	0.0117799
ENSRNOG00000019752	Slc29a1	149.527	145.556	155.966	415.194	367.873	262.568	150.349	348.545	-2.3171	-1.21232	6.95833e-10	1.91882e-07
ENSRNOG00000003931	Arsg	243.347	291.111	267.37	765.321	634.862	467.116	267.276	622.433	-2.32834	-1.2193	1.29636e-11	5.84972e-09
ENSRNOG00000015895	B4galt6	304.917	440.655	393.305	788.043	1083.24	810.324	379.626	893.869	-2.35481	-1.23561	1.38598e-13	8.25543e-11
ENSRNOG00000045998	Sema6b	18.5687	30.9056	30.0307	91.9211	46.8758	49.1701	26.5017	62.6557	-2.36306	-1.24065	0.00217752	0.0478958
ENSRNOG00000054274	Cacnb3	94.7979	119.635	97.8419	302.617	209.922	258.635	104.092	257.058	-2.47008	-1.30456	5.63751e-10	1.58393e-07
ENSRNOG00000059660	AABR07065531.5	37.1373	18.9422	34.8743	115.676	42.7997	66.8714	30.3179	75.1157	-2.47479	-1.3073	0.00174679	0.0412613
ENSRNOG00000054624	AC096792.1	42.0238	97.7017	89.1233	308.814	131.456	132.759	76.283	191.01	-2.50346	-1.32392	0.000183873	0.0075015
ENSRNOG00000034134	Cpm	185.687	191.416	208.277	535.002	501.368	472.033	195.127	502.801	-2.57617	-1.36523	1.46852e-20	2.18678e-17
ENSRNOG00000012404	Thrsp	326.417	318.029	286.745	907.85	775.489	729.685	310.397	804.341	-2.59112	-1.37357	1.53505e-23	2.8573e-20
ENSRNOG00000009582	Rpe65	37.1373	29.9087	20.3434	57.838	68.2757	103.257	29.1298	76.457	-2.62761	-1.39375	0.000165753	0.00689449
ENSRNOG00000054979	AABR07003250.1	830.703	820.495	1012.32	2835.1	2498.69	1706.2	887.841	2346.66	-2.64272	-1.40202	6.49017e-18	7.43424e-15
ENSRNOG00000015003	Pex11a	258.984	386.819	230.558	1023.53	868.222	469.083	292.12	786.944	-2.69393	-1.42971	0.000321403	0.0117304
ENSRNOG00000056457	Gpd1	511.127	591.195	509.553	1445.95	1787.4	1235.15	537.292	1489.5	-2.77226	-1.47106	1.61178e-24	3.42871e-21
ENSRNOG00000032327	Pdia5	74.2746	73.7748	129.81	310.879	229.284	244.867	92.6198	261.677	-2.82321	-1.49734	9.0087e-10	2.43906e-07
ENSRNOG00000003827	Wipi1	170.05	210.358	166.622	606.266	539.072	417.946	182.343	521.095	-2.85776	-1.51489	2.34519e-17	2.32815e-14
ENSRNOG00000028743	Gal3st3	6.84108	35.8904	35.8431	65.0678	126.361	49.1701	26.1915	80.1996	-3.06202	-1.61448	0.00116688	0.0314192
ENSRNOG00000003094	Cmah	3373.63	3979.85	2677.57	10616.4	10696.9	9632.43	3343.69	10315.2	-3.0851	-1.62532	6.34475e-37	2.36199e-33
ENSRNOG00000020985	Atp4a	43.0011	36.8874	59.0926	177.645	145.723	107.191	46.327	143.52	-3.09425	-1.62959	2.19247e-08	3.79628e-06
ENSRNOG00000048016	Mff	42.0238	3.98783	28.0932	96.0524	89.6755	46.2199	24.7016	77.3159	-3.12524	-1.64397	0.00182032	0.0425355
ENSRNOG00000010447	Tmod2	10.7503	20.9361	23.2496	85.7242	62.1614	39.3361	18.312	62.4072	-3.40541	-1.76783	5.68972e-05	0.00298236
ENSRNOG00000009106	C2cd4b	25.4097	24.9239	10.656	123.939	68.2757	15.7344	20.3299	69.3162	-3.40857	-1.76917	0.00196248	0.0445521
ENSRNOG00000050729	AABR07054265.1	30.2962	27.9148	26.1558	107.413	142.666	65.888	28.1223	105.322	-3.74322	-1.90428	5.37349e-08	8.08249e-06
ENSRNOG00000038916	Dram1	15.6368	14.9543	21.3121	77.4616	67.2566	52.1203	17.3011	65.6129	-3.78769	-1.92132	8.56601e-07	8.85809e-05
ENSRNOG00000031855	Actr3b	9.77298	4.98478	7.74985	32.0175	31.5902	23.6017	7.50254	29.0698	-3.86856	-1.9518	0.000616419	0.0192031
ENSRNOG00000049151	Csap1	5575.48	5551.05	10968.9	39024.1	30286.9	16558.5	7365.16	28623.2	-3.88628	-1.95839	4.99081e-05	0.00269269
ENSRNOG00000025923	Zmiz2	10.7503	11.9635	9.68732	38.2144	22.4189	69.8216	10.8004	43.4849	-4.03198	-2.01149	0.000167372	0.00694245
ENSRNOG00000007545	Angptl4	53.7514	23.927	20.3434	141.497	143.685	131.776	32.6739	138.986	-4.25246	-2.0883	3.57022e-10	1.08498e-07
ENSRNOG00000002636	Abat	13.6822	9.96956	10.656	69.199	24.457	56.0539	11.4359	49.9033	-4.36243	-2.12513	2.65207e-05	0.00156095
ENSRNOG00000003648	Cldn6	35.1827	15.9513	46.4991	148.726	146.742	134.726	32.5444	143.398	-4.39865	-2.13706	2.99157e-11	1.1305e-08
ENSRNOG00000018276	Mgat4a	975.343	2510.34	1778.59	7292.75	8571.14	7954.74	1754.76	7939.55	-4.52466	-2.17781	4.04551e-09	9.12753e-07
ENSRNOG00000006096	Slc26a7	10.7503	14.9543	16.4684	81.5929	61.1424	59.9875	14.0577	67.5743	-4.80491	-2.26451	1.75889e-08	3.15561e-06
ENSRNOG00000029212	Vcan	10.7503	4.98478	10.656	39.2472	47.8949	40.3195	8.79704	42.4872	-4.82117	-2.26938	6.09858e-06	0.000468113
ENSRNOG00000027245	Tdrp	22.4778	16.9483	15.4997	117.742	116.171	44.2531	18.3086	92.7218	-5.06051	-2.33928	3.15212e-08	5.21537e-06
ENSRNOG00000050066	AABR07051583.1	18.5687	7.97565	6.78112	25.8205	59.1043	110.141	11.1085	65.022	-5.85719	-2.55021	4.74809e-06	0.000376084
ENSRNOG00000045760	Ebna1bp2	4.88649	4.98478	5.81239	35.1159	54.0091	4.91701	5.22789	31.3474	-5.98881	-2.58227	0.000712927	0.021177
ENSRNOG00000048597	Pak2	7.81838	27.9148	8.71859	49.5754	58.0853	165.212	14.8172	90.9574	-6.15552	-2.62188	8.97672e-07	9.15564e-05
ENSRNOG00000011671	LOC498933	0	2.99087	4.84366	16.5251	17.3237	16.7178	2.61151	16.8556	-6.44899	-2.68907	0.00196298	0.0445521
ENSRNOG00000009339	Cenpe	1.9546	6.97869	0.968732	22.7221	19.3618	21.6349	3.30067	21.2396	-6.46739	-2.69318	0.000535237	0.0172516
ENSRNOG00000036984	Slco1a1	2.93189	0.996956	5.81239	45.4442	7.13328	12.7842	3.24708	21.7872	-6.68285	-2.74046	0.0020308	0.0457499
ENSRNOG00000028436	Rprml	3.90919	4.98478	2.9062	26.8534	42.7997	10.8174	3.93339	26.8235	-6.82178	-2.77015	0.000165617	0.00689449
ENSRNOG00000042084	Acsm1	2.93189	0.996956	4.84366	27.8862	11.2094	23.6017	2.92417	20.8991	-7.12251	-2.83239	0.000446702	0.0150494
ENSRNOG00000016818	Fgfr3	12.7049	35.8904	42.6242	308.814	279.217	118.008	30.4065	235.346	-7.73912	-2.95217	2.22753e-06	0.000195119
ENSRNOG00000027767	Slc38a5	0	6.97869	2.9062	45.4442	15.2856	18.6846	3.29496	26.4715	-8.0585	-3.01051	0.000243557	0.00942027
ENSRNOG00000059461	B4galt1	235.529	432.679	211.184	2307.32	2755.48	2293.29	293.13	2452.03	-8.36634	-3.0646	4.22674e-20	5.72186e-17
ENSRNOG00000031918	AABR07065789.2	3.90919	1.99391	0	4.13129	36.6854	13.7676	1.9677	18.1948	-9.26133	-3.21122	0.00194522	0.0445521
ENSRNOG00000027079	Impad1	1.9546	4.98478	3.87493	88.8227	5.0952	11.8008	3.60477	35.2396	-9.77569	-3.2892	0.000283795	0.010565
ENSRNOG00000006783	Neb	1.9546	1.99391	0.968732	19.6236	16.3046	15.7344	1.63908	17.2209	-10.5223	-3.39538	0.000225872	0.00880485
ENSRNOG00000050143	AABR07065815.1	3.90919	0.996956	1.93746	67.1334	2.03808	4.91701	2.2812	24.6962	-10.8003	-3.433	0.00181956	0.0425355
ENSRNOG00000023387	LOC100912599	1.9546	1.99391	0.968732	25.8205	28.5331	2.95021	1.63908	19.1013	-11.6568	-3.5431	0.000557541	0.0177022
ENSRNOG00000048118	Ankra2	3.90919	0	1.93746	3.09846	36.6854	30.4855	1.94888	23.4231	-11.9849	-3.58315	0.000364746	0.0128403
ENSRNOG00000012521	Shisa2	2.93189	1.99391	2.9062	19.6236	60.1233	34.4191	2.61067	38.0553	-14.5604	-3.86398	1.56664e-07	1.99392e-05
ENSRNOG00000030857	Cyss	6.84108	5.98174	54.249	465.803	441.244	117.025	22.3573	341.357	-15.261	-3.93178	0.00034883	0.0124268
ENSRNOG00000004302	Pah	0	1.99391	0.968732	32.0175	12.2285	4.91701	0.987548	16.3877	-16.6469	-4.05718	0.000619776	0.0192674
ENSRNOG00000049965	LOC100910275	1.9546	1.99391	1.93746	15.4923	76.428	9.83402	1.96199	33.9181	-17.281	-4.11111	7.96675e-06	0.000584398
ENSRNOG00000058862	AABR07051308.1	0.977298	0.996956	1.93746	64.0349	2.03808	4.91701	1.30391	23.6633	-18.0996	-4.17788	0.000507064	0.016737
ENSRNOG00000018522	Echs1	10.7503	9.96956	11.6248	229.286	8.15232	428.763	10.7815	222.067	-20.5967	-4.36434	0.00045289	0.0151755
ENSRNOG00000003756	Lancl3	1.9546	0.996956	0	30.9846	30.5712	0.983402	0.983851	20.8464	-21.2071	-4.40648	0.000358942	0.0127262
ENSRNOG00000013042	Htr1b	4.88649	7.97565	1.93746	189.006	109.037	69.8216	4.9332	122.622	-24.9399	-4.64039	2.21112e-18	2.74381e-15
ENSRNOG00000005655	Cpa6	0.977298	0	0	34.0831	3.05712	11.8008	0.325766	16.3137	-46.3833	-5.53554	0.00021186	0.00833105
ENSRNOG00000001945	Vcsa2	0.977298	29.9087	6.78112	1097.89	576.777	197.664	12.5557	624.11	-49.7418	-5.63639	5.98541e-06	0.000461807
ENSRNOG00000033588	Siglec15	0	0	0	51.6411	31.5902	6.88382	0	30.0384	-166.306	-7.3777	9.98208e-08	1.3637e-05
ENSRNOG00000059020	AABR07048322.1	0.977298	0.996956	0	374.914	230.303	138.66	0.658085	247.959	-378.932	-8.56579	1.07659e-15	8.01576e-13

## Sheet: DEGs_IM Vs ORC
gene_id	gene_name	IM1	IM2	IM3	ORC1	ORC2	ORC3	IM	ORC	FC	log2FoldChange	pvalue	padj
ENSRNOG00000023387	LOC100912599	289.828	225.51	246.586	1.94755	1.98604	0.966779	253.974	1.63346	155.793	7.28349	7.56902e-27	3.57939e-23
ENSRNOG00000002911	Alb	12.5105	20.6799	4.05903	0	0	0	12.4165	0	69.0878	6.11036	5.56652e-05	0.0116136
ENSRNOG00000045686	Nfs1	145.956	248.159	186.715	1.94755	14.8953	8.70101	193.61	8.51463	22.82	4.51223	2.57399e-28	1.82586e-24
ENSRNOG00000028616	Pck1	36.4891	39.3903	26.3837	0.973777	4.96511	0.966779	34.0877	2.30189	14.9044	3.89767	2.10946e-07	0.000140261
ENSRNOG00000009153	Cidec	21.8935	17.7256	21.3099	2.92133	0.993021	0.966779	20.3097	1.62704	12.4647	3.63977	4.49424e-05	0.00980919
ENSRNOG00000031918	AABR07065789.2	22.936	3.93903	44.6493	3.89511	1.98604	0	23.8415	1.96038	12.1692	3.60516	0.000331538	0.0398604
ENSRNOG00000047943	Alkbh6	76.1058	84.6892	7.1033	1.94755	8.93719	3.86712	55.9661	4.91729	11.4088	3.51207	3.96714e-06	0.00140705
ENSRNOG00000053541	AC103129.2	140.744	121.125	64.9445	18.5018	8.93719	4.83389	108.938	10.7576	10.1263	3.34003	1.79608e-13	3.64015e-10
ENSRNOG00000050066	AABR07051583.1	60.4676	58.1007	62.915	18.5018	7.94417	6.76745	60.4944	11.0711	5.46145	2.44929	6.30852e-08	4.47495e-05
ENSRNOG00000050561	Ighv1-9	23.9785	90.5978	88.2839	13.6329	9.93021	22.2359	67.6201	15.2663	4.42859	2.14685	3.27573e-05	0.00774547
ENSRNOG00000001821	Adipoq	40.6593	49.2379	40.5903	9.73777	19.8604	1.93356	43.4958	10.5106	4.15027	2.0532	0.000339493	0.0403578
ENSRNOG00000014448	Arntl	1593.01	1397.37	1658.11	588.161	422.034	210.758	1549.5	406.984	3.80734	1.92878	3.5659e-06	0.00129716
ENSRNOG00000009106	C2cd4b	102.169	44.3141	65.9592	25.3182	24.8255	10.6346	70.8143	20.2594	3.49502	1.8053	3.85086e-05	0.00865873
ENSRNOG00000010079	Car3	467.06	445.111	183.671	114.906	143.988	101.512	365.281	120.135	3.04119	1.60464	2.31291e-08	1.93019e-05
ENSRNOG00000046424	LOC100911485	201.211	94.5368	95.3872	61.348	30.7837	53.1728	130.378	48.4348	2.6885	1.4268	6.36117e-05	0.0125342
ENSRNOG00000006622	Cry1	434.741	357.467	399.814	154.831	177.751	115.047	397.341	149.209	2.66359	1.41337	3.81425e-14	9.01879e-11
ENSRNOG00000059613	AABR07065780.1	124.063	110.293	90.3134	42.8462	23.8325	62.8406	108.223	43.1731	2.5038	1.32412	8.72892e-05	0.0157003
ENSRNOG00000047067	LOC100363537	303.381	212.708	541.881	161.647	146.967	178.854	352.656	162.489	2.16981	1.11757	3.9061e-05	0.00865873
ENSRNOG00000011668	Nfil3	460.805	454.958	451.567	185.018	314.788	135.349	455.777	211.718	2.15371	1.10682	2.84343e-06	0.00109026
ENSRNOG00000017260	Cdr2	190.786	191.043	120.756	57.4529	108.239	69.6081	167.528	78.4334	2.13716	1.0957	0.00010944	0.0182866
ENSRNOG00000009399	RGD1311224	188.701	213.693	160.332	59.4004	119.163	96.6779	187.575	91.7469	2.04558	1.03251	6.62118e-05	0.0128678
ENSRNOG00000032708	RT1-Bb	374.274	328.909	469.833	201.572	176.758	213.658	391.005	197.329	1.98085	0.986119	3.22637e-08	2.54292e-05
ENSRNOG00000009300	Tlk1	175.148	159.531	196.863	89.5875	77.4556	119.881	177.18	95.6412	1.85142	0.88863	0.000106159	0.0182866
ENSRNOG00000042561	Cks1b	258.551	209.754	239.483	111.984	143.988	127.615	235.929	127.862	1.84497	0.883596	4.47435e-06	0.00154823
ENSRNOG00000006987	Tmem263	379.487	348.604	278.044	143.145	219.458	191.422	335.378	184.675	1.81626	0.860968	1.33058e-05	0.0037754
ENSRNOG00000054978	Hist1h1c	2592.81	3565.81	2470.93	1618.42	1536.2	1666.73	2876.52	1607.12	1.78999	0.839952	5.23515e-10	5.71316e-07
ENSRNOG00000003827	Wipi1	285.657	329.894	354.15	169.437	209.527	166.286	323.234	181.75	1.77929	0.831302	1.85077e-06	0.000772259
ENSRNOG00000014872	Sec24d	969.567	1009.38	1117.25	545.315	600.778	619.705	1032.06	588.599	1.75349	0.810227	3.00305e-12	5.32553e-09
ENSRNOG00000010805	Fabp4	200.169	244.22	243.542	106.142	144.981	142.117	229.31	131.08	1.75011	0.807446	5.75102e-05	0.0116557
ENSRNOG00000008691	Ick	415.976	468.745	506.364	304.792	233.36	282.299	463.695	273.484	1.6954	0.761622	1.12384e-06	0.000514318
ENSRNOG00000001633	Tfg	616.144	597.748	598.707	395.354	315.781	359.642	604.2	356.925	1.69246	0.759119	1.27848e-08	1.13361e-05
ENSRNOG00000004645	Galnt5	645.336	699.178	681.917	364.193	465.727	431.183	675.477	420.368	1.6072	0.684551	2.77621e-07	0.000171244
ENSRNOG00000010944	Hyou1	2260.24	2268.88	2885.97	1369.13	1648.41	1606.79	2471.7	1541.44	1.60352	0.681247	4.48264e-08	3.34712e-05
ENSRNOG00000050123	Gdf5	741.25	805.532	676.843	410.934	500.483	491.124	741.208	467.513	1.58566	0.665087	5.56227e-07	0.000292266
ENSRNOG00000008411	Sec23b	1769.2	1609.09	1863.09	1030.26	1170.77	1128.23	1747.13	1109.75	1.57429	0.654702	5.04869e-10	5.71316e-07
ENSRNOG00000024661	Hn1l	788.164	848.862	801.659	386.59	644.471	569.433	812.895	533.498	1.52394	0.607808	0.000268015	0.0346406
ENSRNOG00000027728	Ibtk	726.654	848.862	872.692	507.338	593.827	519.16	816.069	540.108	1.51133	0.595821	3.1766e-06	0.00118596
ENSRNOG00000013912	Slc30a7	675.569	862.648	811.806	488.836	551.127	524.961	783.341	521.641	1.50212	0.587002	8.47089e-06	0.0027262
ENSRNOG00000016984	Atg13	726.654	793.715	1006.64	604.716	522.329	582.001	842.336	569.682	1.47859	0.564223	8.58964e-05	0.0157003
ENSRNOG00000007793	Pnrc1	1075.91	976.88	826.013	589.135	772.57	587.802	959.6	649.836	1.47679	0.562467	0.000128182	0.0202058
ENSRNOG00000020950	Syvn1	1268.78	1511.6	1424.72	896.849	960.251	1036.39	1401.7	964.496	1.45346	0.539489	1.58772e-06	0.000703906
ENSRNOG00000031203	Scfd1	869.483	830.151	890.957	522.918	662.345	617.772	863.53	601.012	1.43685	0.522909	2.52177e-05	0.0065048
ENSRNOG00000020038	Chpf	1220.82	1163	1312.08	762.468	947.342	872.035	1231.97	860.615	1.43154	0.51757	9.61443e-06	0.00290213
ENSRNOG00000047620	Golph3l	585.911	661.758	706.271	443.069	501.476	439.884	651.313	461.476	1.41173	0.497459	0.000143425	0.0221171
ENSRNOG00000030225	Clpx	1538.8	1478.12	1593.17	1207.48	1006.92	1111.8	1536.7	1108.73	1.38586	0.470777	8.64728e-06	0.0027262
ENSRNOG00000007699	Golga5	838.207	821.288	788.467	654.378	576.945	558.798	815.987	596.707	1.36744	0.451474	0.000110225	0.0182866
ENSRNOG00000001083	Kdelr2	1182.25	1173.83	1337.45	893.927	880.81	927.141	1231.18	900.626	1.36697	0.450981	1.84541e-05	0.00503478
ENSRNOG00000023850	Tbrg1	888.249	771.066	888.928	645.614	652.415	574.267	849.414	624.099	1.36091	0.444574	0.000212173	0.0292243
ENSRNOG00000000236	Zfp207	700.591	723.797	655.533	490.784	527.294	512.393	693.307	510.157	1.35913	0.442686	0.000151305	0.0228358
ENSRNOG00000058050	Bclaf1	770.441	860.679	830.072	608.611	599.785	620.672	820.397	609.689	1.34576	0.428423	0.000115943	0.0186919
ENSRNOG00000000796	Ranbp2	1971.45	2093.6	2136.06	1506.43	1588.83	1525.58	2067.04	1540.28	1.34208	0.424473	2.72811e-06	0.0010751
ENSRNOG00000002251	Sec31a	1673.29	1901.57	1609.41	1261.04	1365.4	1301.28	1728.09	1309.24	1.32008	0.400624	0.000114698	0.0186919
ENSRNOG00000018494	Ppp1r3c	2605.32	2438.26	2520.66	2021.56	1856.95	1865.88	2521.41	1914.8	1.31673	0.396959	9.15545e-06	0.00282366
ENSRNOG00000046472	Arfgap3	2345.73	2596.81	2366.41	1906.66	1707	1959.66	2436.32	1857.77	1.31143	0.391141	6.94366e-05	0.0133121
ENSRNOG00000026048	Gbf1	1518.99	1714.46	1692.62	1208.46	1259.15	1306.12	1642.02	1257.91	1.30548	0.384575	0.000108102	0.0182866
ENSRNOG00000001598	Usp16	863.228	921.734	876.751	673.854	671.282	701.882	887.237	682.339	1.30037	0.378918	0.000356755	0.0418288
ENSRNOG00000009351	Srp68	1103.01	1114.75	1136.53	820.894	922.517	854.633	1118.1	866.014	1.29118	0.368694	0.000341364	0.0403578
ENSRNOG00000036689	P4hb	18444.7	17794.6	19927.8	15501.6	13174.4	14945.4	18722.4	14540.5	1.28759	0.364674	8.62776e-05	0.0157003
ENSRNOG00000006247	Copa	2604.28	2547.57	2386.71	1783.96	2096.27	2001.23	2512.85	1960.49	1.28177	0.358139	0.000274275	0.0346406
ENSRNOG00000031479	Hdlbp	11232.4	11277.5	10896.5	9668.63	8989.82	8602.4	11135.4	9086.95	1.22543	0.293293	0.00031369	0.038037
ENSRNOG00000005958	Rrbp1	5403.51	5625.92	5243.25	4473.53	4490.44	4376.61	5424.23	4446.86	1.21982	0.286663	0.000271747	0.0346406
ENSRNOG00000015845	Fam129b	4816.56	4910.99	4761.24	5842.66	6073.32	6361.41	4829.6	6092.46	-1.26148	-0.335116	2.61284e-05	0.00661934
ENSRNOG00000012083	St6galnac2	11635.9	11115	12679.4	16226	14529.9	14024.1	11810.1	14926.7	-1.2639	-0.337885	0.000275442	0.0346406
ENSRNOG00000019328	Phgdh	1449.14	1426.91	1526.2	1895.94	1950.29	1881.35	1467.42	1909.2	-1.30106	-0.379692	2.31521e-05	0.00608257
ENSRNOG00000005116	AABR07054332.1	1263.57	1239.81	1165.96	1491.83	1579.9	1705.4	1223.11	1592.37	-1.30195	-0.380678	0.000151157	0.0228358
ENSRNOG00000001344	Aldh2	1729.58	1622.88	1554.61	2115.04	1987.04	2287.4	1635.69	2129.83	-1.30222	-0.380969	0.000117561	0.0187397
ENSRNOG00000020853	Scap	748.548	749.401	858.485	1047.78	1024.8	1009.32	785.478	1027.3	-1.30787	-0.387216	0.000375382	0.043652
ENSRNOG00000016660	Cox5b	938.291	986.728	1034.04	1149.06	1420.02	1390.23	986.352	1319.77	-1.33793	-0.420001	0.000294383	0.0366352
ENSRNOG00000004107	Rpl23	3952.29	3522.48	3719.09	4570.91	5116.04	5325.99	3731.29	5004.31	-1.34124	-0.423565	8.18553e-06	0.00270065
ENSRNOG00000021177	Cox8a	2198.73	2036.48	2161.43	2642.83	2829.12	3111.09	2132.21	2861.01	-1.34189	-0.424268	1.21169e-05	0.0035082
ENSRNOG00000021035	Rpl18	5068.86	4343.77	4437.54	5161.99	6696.93	6808.06	4616.72	6222.33	-1.34782	-0.430626	0.000310248	0.0379438
ENSRNOG00000018320	Rps15a	2480.22	1965.58	1969.64	2640.88	2992.97	3026.98	2138.48	2886.94	-1.35014	-0.433109	0.000195952	0.0275245
ENSRNOG00000042886	Rps28	902.844	782.883	817.895	1259.09	1104.24	1039.29	834.541	1134.21	-1.3593	-0.442859	0.000174762	0.0251134
ENSRNOG00000022946	Slc22a3	1190.59	1234.89	1318.17	1946.58	1624.58	1567.15	1247.88	1712.77	-1.37252	-0.456824	5.6702e-05	0.0116557
ENSRNOG00000012748	Vamp8	938.291	771.066	733.67	1097.45	1060.55	1209.44	814.342	1122.48	-1.37873	-0.463343	0.000208629	0.0290178
ENSRNOG00000011076	Ank2	470.188	424.431	502.305	661.195	637.52	631.307	465.641	643.34	-1.38188	-0.466634	0.000159565	0.0238289
ENSRNOG00000020093	LOC100360573	631.783	622.367	557.102	758.572	878.824	878.802	603.751	838.733	-1.3892	-0.474252	8.7427e-05	0.0157003
ENSRNOG00000021232	Ddrgk1	726.654	725.767	713.375	895.875	1057.57	1055.72	721.932	1003.06	-1.38937	-0.474432	3.05292e-05	0.00734097
ENSRNOG00000003515	Ephx1	1299.01	1506.68	1479.52	1666.13	2211.46	2077.61	1428.4	1985.07	-1.38955	-0.474618	0.000130199	0.0202982
ENSRNOG00000015335	Rpl13	4800.92	4583.06	4340.12	6243.86	6341.43	6647.57	4574.7	6410.95	-1.40143	-0.486896	4.60807e-09	4.35832e-06
ENSRNOG00000016580	Rps23	4081.57	3255.61	2977.3	4392.71	4979.01	5165.5	3438.16	4845.74	-1.40948	-0.495166	6.11768e-05	0.0122242
ENSRNOG00000037402	Myeov2	477.486	413.598	456.641	629.06	622.624	680.612	449.242	644.099	-1.4342	-0.520247	2.85671e-05	0.0071102
ENSRNOG00000012794	Grhpr	740.207	810.456	710.33	1314.6	1032.74	903.938	753.665	1083.76	-1.43786	-0.523927	0.000275914	0.0346406
ENSRNOG00000003649	Qsox1	900.759	1009.38	874.721	1239.62	1241.28	1576.82	928.286	1352.57	-1.457	-0.542996	1.8435e-05	0.00503478
ENSRNOG00000010420	Shfm1	426.401	398.827	371.401	480.072	662.345	637.107	398.876	593.175	-1.48716	-0.572564	0.000175247	0.0251134
ENSRNOG00000016952	LOC686442	896.589	838.029	803.688	1053.63	1398.17	1342.86	846.102	1264.89	-1.495	-0.580142	6.18033e-06	0.00208763
ENSRNOG00000047708	Gstz1	593.208	516.013	494.187	901.718	696.108	807.26	534.47	801.695	-1.50038	-0.585328	1.96406e-05	0.00525739
ENSRNOG00000005853	Tacr1	223.105	239.296	299.353	398.275	374.369	371.243	253.918	381.296	-1.50149	-0.586398	0.000242758	0.0324906
ENSRNOG00000033694	Klf16	187.658	189.074	182.656	290.186	270.102	286.167	186.463	282.151	-1.51324	-0.59764	0.000174191	0.0251134
ENSRNOG00000018774	Rps14	4478.78	3488.01	3131.54	4132.71	6417.9	6257.96	3699.44	5602.86	-1.51456	-0.598896	0.000246437	0.0326748
ENSRNOG00000007779	Kank4	255.424	215.662	252.675	373.93	364.439	364.476	241.253	367.615	-1.52438	-0.608226	4.6906e-05	0.0100827
ENSRNOG00000052275	H2afv	262.721	216.647	204.981	351.534	311.809	407.014	228.116	356.785	-1.56489	-0.646057	0.000166928	0.0246688
ENSRNOG00000009329	Nr1d1	660.974	1030.06	594.648	1013.7	1373.35	1415.36	761.893	1267.47	-1.66317	-0.733936	0.000102176	0.0178959
ENSRNOG00000056153	Fam46b	679.74	728.721	763.098	1320.44	935.426	1382.49	723.853	1212.79	-1.67553	-0.744618	4.77655e-07	0.000260634
ENSRNOG00000013407	Slc5a11	314.849	330.879	442.434	643.667	650.429	573.3	362.721	622.465	-1.71593	-0.778994	4.65795e-07	0.000260634
ENSRNOG00000017311	Me3	946.631	933.551	1243.08	1414.9	2136.98	1875.55	1041.09	1809.14	-1.73771	-0.797183	4.5142e-07	0.000260634
ENSRNOG00000042344	Smim22	191.828	229.449	239.483	338.874	418.062	395.413	220.253	384.116	-1.74322	-0.801756	8.95082e-07	0.000423284
ENSRNOG00000009823	Naa38	170.977	193.997	169.465	229.811	336.634	384.778	178.146	317.075	-1.77947	-0.831451	5.07243e-05	0.0107407
ENSRNOG00000023348	Tbc1d2	78.1909	69.9178	84.2249	150.935	143.988	120.847	77.4445	138.59	-1.78993	-0.839907	0.000299803	0.0369853
ENSRNOG00000033528	Tll1	483.741	385.04	639.297	873.478	970.182	883.636	502.693	909.099	-1.80876	-0.855004	2.17505e-07	0.000140261
ENSRNOG00000009068	Phlda3	85.4887	118.171	90.3134	134.381	246.269	185.622	97.991	188.757	-1.92455	-0.944522	0.000238197	0.0321838
ENSRNOG00000018413	Per3	75.0633	77.7959	53.7822	119.775	131.079	168.22	68.8804	139.691	-2.02804	-1.02008	7.45363e-05	0.0140993
ENSRNOG00000014087	Kifc3	92.7865	102.415	134.963	217.152	198.604	254.263	110.055	223.34	-2.02927	-1.02096	1.66697e-06	0.000716645
ENSRNOG00000043114	Tomm7	233.53	214.677	190.774	359.324	482.608	475.655	212.994	439.196	-2.06226	-1.04423	8.53461e-10	8.64861e-07
ENSRNOG00000000007	Gad1	125.105	102.415	101.476	317.451	196.618	211.725	109.665	241.931	-2.20729	-1.14228	6.672e-07	0.000329525
ENSRNOG00000019383	Tef	321.104	302.321	246.586	519.997	672.275	785.991	290.004	659.421	-2.27409	-1.18529	8.333e-12	1.31356e-08
ENSRNOG00000021027	Dbp	256.466	282.626	216.143	588.161	744.766	1091.49	251.745	808.14	-3.20991	-1.68253	1.25184e-16	3.55198e-13
ENSRNOG00000022784	AABR07036035.1	31.2764	5.90855	29.428	94.4564	69.5115	55.1064	22.2043	73.0248	-3.29813	-1.72165	0.000253462	0.033295
ENSRNOG00000059883	AABR07052758.1	36.4891	60.0703	20.2952	242.471	136.044	184.655	38.9515	187.723	-4.81199	-2.26663	2.0953e-11	2.9726e-08
ENSRNOG00000048168	Gtpbp6	6.25527	2.95427	8.11806	51.6102	16.8814	29.9701	5.77587	32.8206	-5.69951	-2.51084	0.000110851	0.0182866
ENSRNOG00000049814	Rbm39	16.6807	9.84758	4.05903	100.299	81.4277	9.66779	10.1958	63.7982	-6.26628	-2.64761	9.08226e-05	0.0161063
ENSRNOG00000046308	LOC100910308	12.5105	6.89331	5.07379	95.4302	14.8953	78.3091	8.15921	62.8782	-7.72756	-2.95001	2.3957e-06	0.000971078
ENSRNOG00000055179	Tsen34	3.12764	6.89331	8.11806	31.1609	129.093	75.4088	6.04634	78.5541	-12.9491	-3.69478	2.10079e-10	2.70944e-07
ENSRNOG00000037984	LOC100910414	6.25527	2.95427	4.05903	94.4564	80.4347	6.76745	4.42286	60.5528	-13.7303	-3.77929	6.7359e-07	0.000329525
ENSRNOG00000020117	Brms1	6.25527	5.90855	6.08855	100.299	84.4068	104.412	6.08412	96.3727	-15.8488	-3.9863	7.82693e-19	2.77602e-15
ENSRNOG00000018476	Fuom	1.04255	1.96952	3.04427	6.81644	6.95115	101.512	2.01878	38.4265	-19.004	-4.24823	3.81462e-05	0.00865873
ENSRNOG00000040005	Ndufa1	3.12764	2.95427	3.04427	0.973777	333.655	249.429	3.04206	194.686	-64.0023	-6.00005	0.000216189	0.0294911
ENSRNOG00000049394	LOC679739	3.12764	1.96952	0	322.32	306.844	436.984	1.69905	355.383	-210.366	-7.71676	4.58337e-30	6.50242e-26
		Ensembl:ENSRNOG00000023387 Ensembl:ENSRNOG00000049394 : the same gene

## Sheet: DEGs_IM Vs EM
gene_id	gene_name	IM1	IM2	IM3	EM1	EM2	EM3	IM	EM	FC	log2FoldChange	pvalue	padj
ENSRNOG00000048561	Hprt1	2.04487	64.9329	9.00401	1.01414	0	1.92988	25.3273	0.981339	25.6746	4.68227	0.000181324	0.00974831
ENSRNOG00000060344	AABR07073045.1	75.6601	32.951	64.0285	4.05655	1.99564	1.92988	57.5466	2.66069	21.7063	4.44004	3.83614e-11	1.62615e-08
ENSRNOG00000047565	LOC100911186	235.16	15.5064	86.0383	4.05655	4.98909	8.68446	112.235	5.91003	18.9623	4.24506	7.33107e-05	0.00496586
ENSRNOG00000047642	AABR07051426.1	49.0768	0.969149	19.0085	3.04241	0	0.96494	23.0181	1.33578	17.3063	4.11323	0.000482903	0.0211528
ENSRNOG00000028616	Pck1	35.7852	38.7659	26.0116	1.01414	2.99345	1.92988	33.5209	1.97916	16.9102	4.07982	1.29183e-07	2.39098e-05
ENSRNOG00000009399	RGD1311224	185.061	210.305	158.07	5.07068	16.9629	12.5442	184.479	11.5259	15.9654	3.99688	3.45832e-30	2.27229e-26
ENSRNOG00000023387	LOC100912599	284.237	221.935	243.108	25.3534	27.9389	2.89482	249.76	18.729	13.3529	3.73909	1.0878e-06	0.000150472
ENSRNOG00000059891	AABR07054968.1	9.20191	19.383	46.0205	3.04241	2.99345	0	24.8685	2.01195	12.4663	3.63996	7.72982e-05	0.00518914
ENSRNOG00000016262	Dnase2b	152.343	121.144	344.153	4.05655	31.9302	22.1936	205.88	19.3935	10.6097	3.40731	5.31594e-05	0.00378822
ENSRNOG00000014152	Kcnip3	98.1537	115.329	144.064	3.04241	17.9607	22.1936	119.182	14.3989	8.24032	3.0427	2.83711e-13	2.07125e-10
ENSRNOG00000029792	Ogn	28.6281	73.6553	71.0317	5.07068	11.9738	8.68446	57.7717	8.57632	6.73391	2.75144	1.59139e-07	2.78833e-05
ENSRNOG00000007320	Fam3d	961.088	618.317	509.227	156.177	92.7971	80.09	696.211	109.688	6.3526	2.66735	7.97199e-27	3.492e-23
ENSRNOG00000009153	Cidec	21.4711	17.4447	21.0094	1.01414	5.98691	3.85976	19.975	3.62027	5.50245	2.46007	0.00109753	0.0392986
ENSRNOG00000018445	Agt	85.8844	181.231	154.069	14.1979	19.9564	46.3171	140.395	26.8238	5.22011	2.38408	1.56409e-09	4.74782e-07
ENSRNOG00000049105	AC095947.2	81.7947	84.3159	154.069	20.2827	19.9564	27.0183	106.726	22.4191	4.75498	2.24944	5.76012e-10	1.99194e-07
ENSRNOG00000010210	Slc7a11	113.49	112.421	77.0343	32.4524	22.9498	8.68446	100.982	21.3622	4.74328	2.24589	1.16282e-08	3.05613e-06
ENSRNOG00000054128	AABR07051730.1	21.4711	44.5808	109.049	9.12723	1.99564	26.0534	58.3668	12.3921	4.69603	2.23144	0.000814023	0.0308513
ENSRNOG00000053633	Rnase1	104.288	86.2542	41.0183	11.1555	18.9585	20.2637	77.1869	16.7926	4.58876	2.1981	4.21706e-07	6.59719e-05
ENSRNOG00000012262	Depdc7	192.218	183.169	150.067	28.3958	38.9149	48.247	175.151	38.5192	4.5389	2.18234	3.03986e-16	3.07283e-13
ENSRNOG00000018824	Slc7a5	1786.19	2147.63	1571.7	333.651	759.34	138.951	1835.18	410.647	4.4692	2.16002	0.000995461	0.0365401
ENSRNOG00000001821	Adipoq	39.8749	48.4574	40.0178	4.05655	19.9564	5.78964	42.7834	9.93418	4.31009	2.10772	0.000145739	0.0082907
ENSRNOG00000045569	LOC100912253	31.6955	54.2723	33.0147	2.02827	16.9629	11.5793	39.6608	10.1902	3.88666	1.95853	0.000754179	0.0295749
ENSRNOG00000005810	Nlrc4	127.804	87.2234	136.061	25.3534	38.9149	31.843	117.029	32.0371	3.64969	1.86777	2.15493e-09	6.02509e-07
ENSRNOG00000049132	AABR07029710.1	125.759	88.1925	139.062	24.3393	47.8953	25.0884	117.671	32.441	3.62726	1.85888	2.77839e-08	6.63833e-06
ENSRNOG00000054489	AABR07042821.1	293.439	320.788	570.254	108.513	50.8887	175.619	394.827	111.673	3.53466	1.82157	0.00120018	0.0422018
ENSRNOG00000007319	Trib3	715.704	967.21	437.195	173.417	271.407	204.567	706.703	216.464	3.26504	1.7071	5.27867e-13	3.6509e-10
ENSRNOG00000033261	Fam107a	606.303	383.783	270.12	109.527	133.708	142.811	420.069	128.682	3.26256	1.706	7.71819e-12	3.90095e-09
ENSRNOG00000023418	AABR07014573.1	219.823	180.262	247.11	49.6927	118.74	31.843	215.732	66.7587	3.2335	1.6931	8.85841e-07	0.000123839
ENSRNOG00000053541	AC103129.2	138.029	119.205	64.0285	38.5372	51.8865	9.6494	107.087	33.3577	3.21554	1.68506	0.000151494	0.0085601
ENSRNOG00000005888	Fsip1	128.827	59.1181	41.0183	10.1414	21.952	39.5626	76.321	23.8853	3.18617	1.67182	0.000719597	0.0286552
ENSRNOG00000005248	Slc1a4	817.947	879.987	469.209	260.633	316.308	161.145	722.381	246.029	2.93666	1.55417	6.41839e-05	0.00448638
ENSRNOG00000050944	AABR07065768.1	35.7852	80.4393	57.0254	21.2969	22.9498	15.439	57.75	19.8952	2.90858	1.54031	0.000293193	0.0147055
ENSRNOG00000029830	Adm2	421.243	418.672	436.194	133.866	223.511	83.9498	425.37	147.109	2.89325	1.53269	1.11088e-09	3.5605e-07
ENSRNOG00000025444	RGD1565682	325.134	261.67	130.058	73.0178	77.8298	102.284	238.954	84.3771	2.83007	1.50084	2.94134e-07	4.71367e-05
ENSRNOG00000021355	Car6	388030	343111	413673	134560	140181	131868	381605	135536	2.81552	1.4934	5.35168e-62	7.03264e-58
ENSRNOG00000027742	Adamtsl2	53.1666	85.2851	54.0241	17.2403	22.9498	28.9482	64.1586	23.0461	2.78194	1.47609	0.000139874	0.0079917
ENSRNOG00000014992	M6pr	231.07	80.4393	281.125	65.9189	84.8145	62.7211	197.545	71.1515	2.77553	1.47276	2.52911e-05	0.00212026
ENSRNOG00000050647	Hspa1b	57.2563	165.724	166.074	57.8058	50.8887	33.7729	129.685	47.4891	2.73474	1.4514	0.000102476	0.00639759
ENSRNOG00000045885	LOC100365810	53.1666	63.9638	162.072	32.4524	25.9433	45.3522	93.0675	34.5826	2.68899	1.42707	0.000702732	0.028212
ENSRNOG00000049334	Atp2c2	677.874	700.694	455.203	191.672	300.343	206.497	611.257	232.837	2.62547	1.39258	4.18168e-12	2.28965e-09
ENSRNOG00000046424	LOC100911485	197.33	93.0383	94.0419	45.6361	65.856	35.7028	128.137	49.065	2.61135	1.38479	6.82191e-05	0.00471825
ENSRNOG00000047067	LOC100363537	297.528	209.336	534.238	92.2864	142.688	165.005	347.034	133.326	2.60118	1.37917	2.20425e-06	0.000273265
ENSRNOG00000000547	Tspyl4	85.8844	119.205	96.0428	39.5513	43.904	34.7379	100.378	39.3977	2.55043	1.35074	4.33545e-06	0.000482815
ENSRNOG00000036827	Ppp1r1a	854.755	948.796	654.292	370.16	320.3	302.026	819.281	330.829	2.47733	1.30878	1.02305e-16	1.49377e-13
ENSRNOG00000050499	LOC100909412	159.5	77.5319	272.121	74.032	70.8451	65.6159	169.718	70.1643	2.41834	1.27402	0.000254202	0.0130999
ENSRNOG00000010805	Fabp4	196.307	240.349	240.107	41.5796	119.738	121.582	225.588	94.3001	2.39021	1.25714	2.98587e-05	0.00242206
ENSRNOG00000019661	Gdf15	95.0864	146.341	204.091	50.7068	99.7818	37.6327	148.506	62.7071	2.37006	1.24492	0.000423343	0.0191833
ENSRNOG00000002810	Gfpt2	205.509	139.557	68.0303	62.8765	46.8975	68.5108	137.699	59.4282	2.31578	1.2115	0.000502336	0.0219309
ENSRNOG00000009300	Tlk1	171.769	157.002	194.087	64.9047	76.832	85.8797	174.286	75.8721	2.29505	1.19853	1.08915e-07	2.10479e-05
ENSRNOG00000000525	Pi16	85.8844	112.421	91.0406	35.4948	37.9171	55.9665	96.4487	43.1261	2.23438	1.15987	0.000124006	0.00737359
ENSRNOG00000059166	Ldb3	389.547	338.233	423.189	197.757	144.684	179.479	383.656	173.973	2.20509	1.14084	7.21845e-11	2.78993e-08
ENSRNOG00000003787	Lcorl	117.58	86.2542	63.0281	34.4806	46.8975	43.4223	88.9541	41.6001	2.13653	1.09527	0.000788593	0.0303897
ENSRNOG00000010666	Wisp2	112.468	84.3159	165.074	85.1875	41.9084	46.3171	120.619	57.8043	2.08809	1.06219	0.0014963	0.0491571
ENSRNOG00000042018	RGD1306750	395251	323437	308338	144985	160885	191530	342342	165800	2.06479	1.04599	4.21996e-18	7.92207e-15
ENSRNOG00000011078	Srm	155.41	127.928	165.074	44.622	102.775	72.3705	149.47	73.2559	2.03906	1.0279	0.000326396	0.0158272
ENSRNOG00000002318	Limch1	101.221	202.552	184.082	81.1309	82.8189	82.0199	162.618	81.9899	1.98467	0.988898	0.000261648	0.0134309
ENSRNOG00000001728	Fam43a	225.958	274.269	259.115	130.824	143.686	111.933	253.114	128.814	1.96633	0.975508	2.63384e-07	4.273e-05
ENSRNOG00000042785	Sesn2	404.884	541.754	267.119	188.629	292.361	152.461	404.586	211.15	1.91693	0.938798	0.000244854	0.0126678
ENSRNOG00000015741	Slc2a13	356.829	369.246	171.076	116.626	160.649	194.918	299.05	157.397	1.89919	0.925386	0.00056946	0.0241396
ENSRNOG00000019484	Slc6a9	851.687	784.041	773.345	497.941	482.944	291.412	803.024	424.099	1.89427	0.921642	1.45609e-07	2.62116e-05
ENSRNOG00000032825	LOC100362027	918.146	1321.92	1523.68	659.189	638.604	713.091	1254.58	670.294	1.87178	0.904408	1.70642e-08	4.31232e-06
ENSRNOG00000006118	Klf10	1033.68	861.573	955.426	602.397	604.678	330.01	950.227	512.361	1.85515	0.891538	2.181e-06	0.000272957
ENSRNOG00000009434	RGD1310507	245.384	211.274	297.132	136.908	175.616	94.5641	251.264	135.696	1.8525	0.889475	0.000135253	0.00779541
ENSRNOG00000057558	AC128792.2	1262.71	1042.8	1205.54	509.097	671.532	791.251	1170.35	657.293	1.77985	0.831756	4.84467e-08	1.01054e-05
ENSRNOG00000008516	LOC688684	391.592	413.826	510.227	212.969	214.531	311.676	438.549	246.392	1.77888	0.830966	6.33882e-06	0.000677224
ENSRNOG00000001962	Fam3b	2238.11	1851.07	1392.62	942.133	906.019	1238.98	1827.27	1029.05	1.77538	0.828127	4.5018e-07	6.95979e-05
ENSRNOG00000006622	Cry1	426.355	351.801	394.176	273.817	277.393	110.003	390.777	220.404	1.77396	0.826972	0.00132865	0.0451157
ENSRNOG00000015036	Ctgf	274.012	257.794	259.115	148.064	191.581	114.828	263.64	151.491	1.74112	0.800019	8.1129e-05	0.00533058
ENSRNOG00000004610	Lum	361.942	395.413	341.152	147.05	223.511	261.499	366.169	210.687	1.73694	0.796544	6.03019e-05	0.00423758
ENSRNOG00000053706	Lonrf1	197.33	172.508	169.075	131.838	81.8211	98.4239	179.638	104.028	1.72738	0.788588	0.000517506	0.0225184
ENSRNOG00000020651	Cars	1331.21	1272.49	1129.5	729.164	936.951	507.559	1244.4	724.558	1.7178	0.780562	7.60512e-06	0.00076876
ENSRNOG00000019206	Nupr1	176.881	151.187	194.087	112.569	122.732	71.4056	174.052	102.235	1.70356	0.768554	0.00143632	0.0478213
ENSRNOG00000007884	Bcap29	147.23	156.033	138.062	84.1733	76.832	100.354	147.108	87.1197	1.68786	0.755193	0.000767115	0.0298244
ENSRNOG00000028746	Gsto1	215.734	232.596	247.11	103.442	138.697	171.759	231.813	137.966	1.67887	0.747491	0.000380988	0.0178428
ENSRNOG00000019023	Tars	1207.49	1332.58	1283.57	679.471	990.833	609.842	1274.55	760.049	1.67719	0.746043	2.27748e-06	0.000274572
ENSRNOG00000007947	Fam13a	374.211	464.222	631.281	306.269	283.38	287.552	489.905	292.401	1.67573	0.744789	4.8561e-05	0.00352564
ENSRNOG00000003835	Slc43a2	694.233	787.918	659.294	512.139	409.105	362.818	713.815	428.021	1.66855	0.738591	8.08792e-07	0.000114283
ENSRNOG00000011260	Cmbl	585.855	505.896	691.308	359.004	373.184	340.624	594.353	357.604	1.66193	0.732858	6.66604e-07	9.84251e-05
ENSRNOG00000047895	Mettl1	209.599	201.583	211.094	114.597	135.703	124.477	207.425	124.926	1.66006	0.731237	0.00010178	0.00639759
ENSRNOG00000018494	Ppp1r3c	2555.06	2399.61	2485.11	1514.11	1694.3	1300.74	2479.93	1503.05	1.65008	0.722533	6.91767e-11	2.7547e-08
ENSRNOG00000004500	Myc	329.224	321.757	457.204	205.87	268.413	202.637	369.395	225.64	1.63718	0.711209	0.000167693	0.00920074
ENSRNOG00000008106	Shmt2	407.951	395.413	412.184	241.364	289.367	212.287	405.182	247.673	1.63639	0.710519	6.87931e-06	0.000717468
ENSRNOG00000026458	Tbccd1	146.208	136.65	168.075	88.2299	93.7949	93.5992	150.311	91.8747	1.63558	0.709804	0.00112377	0.0400201
ENSRNOG00000000925	Psph	251.519	231.626	225.1	147.05	183.599	108.073	236.082	146.241	1.61515	0.69167	0.00103122	0.0375382
ENSRNOG00000027491	Vldlr	346.605	448.716	350.156	274.831	223.511	213.252	381.826	237.198	1.61085	0.687821	6.58885e-05	0.00458117
ENSRNOG00000028632	Bcl2l14	583.81	576.643	738.329	355.962	450.016	376.327	632.927	394.102	1.60594	0.683414	5.62139e-06	0.000610502
ENSRNOG00000012563	Arhgap29	571.541	753.998	901.402	422.895	453.009	514.313	742.313	463.406	1.60178	0.679677	3.60416e-05	0.00283424
ENSRNOG00000004624	Rnd3	300.596	300.436	274.122	204.856	185.594	156.32	291.718	182.257	1.60149	0.679418	7.85815e-05	0.00518914
ENSRNOG00000018404	Aars	2877.13	2716.52	2629.17	1779.81	2049.52	1306.53	2740.94	1711.95	1.60123	0.679179	1.15575e-06	0.000156575
ENSRNOG00000007213	Yars	1010.16	1097.08	1141.51	609.496	878.08	544.226	1082.92	677.267	1.59921	0.677356	2.135e-05	0.00184579
ENSRNOG00000033915	Gpt	929.392	933.29	905.404	488.814	661.553	581.859	922.695	577.409	1.5978	0.676086	1.83563e-07	3.13273e-05
ENSRNOG00000054978	Hist1h1c	2542.79	3509.29	2436.09	1803.13	1824.01	1691.54	2829.39	1772.9	1.5961	0.674552	3.7266e-07	5.90016e-05
ENSRNOG00000003969	Fam20a	1457.99	1209.5	1147.51	762.631	725.414	902.219	1271.67	796.755	1.59562	0.674119	2.29872e-07	3.87275e-05
ENSRNOG00000014847	Rassf10	322.067	369.246	337.15	252.52	245.463	149.566	342.821	215.85	1.58953	0.668602	0.000753935	0.0295749
ENSRNOG00000007023	Galm	416.131	388.629	352.157	201.813	294.356	232.551	385.639	242.907	1.58737	0.666637	0.000105972	0.00653792
ENSRNOG00000055408	Gcat	399.772	408.012	367.164	221.082	272.404	247.025	391.649	246.837	1.58653	0.665876	1.15179e-05	0.00109679
ENSRNOG00000011052	Gars	2397.61	2366.66	2556.14	1353.87	2020.58	1255.39	2440.14	1543.28	1.58121	0.661032	1.20473e-05	0.00113895
ENSRNOG00000047708	Gstz1	581.765	507.834	487.217	319.453	304.335	381.151	525.605	334.98	1.56832	0.649223	9.48815e-06	0.000923583
ENSRNOG00000014288	Fn1	278.102	279.115	317.141	172.403	179.607	205.532	291.453	185.848	1.56759	0.648546	0.000112209	0.00679514
ENSRNOG00000014382	C2cd5	1662.48	1742.53	1456.65	978.642	1095.6	1049.86	1620.55	1041.37	1.55617	0.638004	4.38133e-09	1.19948e-06
ENSRNOG00000054259	Klf11	400.794	316.912	427.19	317.425	226.505	195.883	381.632	246.604	1.54807	0.630472	0.00130912	0.0449167
ENSRNOG00000023896	Dusp6	545.98	779.195	683.305	487.8	486.935	334.834	669.493	436.523	1.53453	0.617796	0.000381541	0.0178428
ENSRNOG00000012582	Eif4ebp1	2711.49	2337.59	2513.12	1478.61	2036.55	1428.11	2520.73	1647.76	1.5298	0.613343	4.95804e-06	0.000547509
ENSRNOG00000049560	Glul	7351.3	7810.37	8651.86	4004.83	5329.35	6244.13	7937.84	5192.77	1.52856	0.612177	7.91849e-06	0.000794327
ENSRNOG00000017852	Nars	2882.24	2963.66	3180.42	1939.03	2346.87	1638.47	3008.77	1974.79	1.52372	0.607597	1.1473e-06	0.000156575
ENSRNOG00000059705	Elmo1	536.778	682.281	730.325	418.838	457.001	404.31	649.795	426.716	1.52317	0.607079	2.90253e-05	0.00236908
ENSRNOG00000029574	Rps4x	762.736	719.108	818.365	449.262	546.804	517.208	766.736	504.425	1.51969	0.603778	1.78762e-06	0.000234911
ENSRNOG00000043348	Rpl39	966.2	806.332	1050.47	520.252	659.558	691.862	941	623.891	1.50776	0.592404	3.79146e-05	0.00293079
ENSRNOG00000014565	Lcmt1	412.041	306.251	356.159	227.167	256.439	230.621	358.15	238.076	1.50381	0.588618	0.000364053	0.0173334
ENSRNOG00000021201	Txnip	10865.4	9011.14	10237.6	7439.71	6382.04	6205.53	10038	6675.76	1.50366	0.588481	1.58139e-08	4.07471e-06
ENSRNOG00000017702	Gpld1	441.691	365.369	406.181	254.548	289.367	269.218	404.414	271.045	1.49157	0.576831	0.000109937	0.00674838
ENSRNOG00000025459	Mars	1801.53	1607.82	1842.82	1236.23	1499.72	816.339	1750.72	1184.1	1.4787	0.564334	0.000843805	0.0316813
ENSRNOG00000009661	Tgds	917.123	804.393	792.353	544.591	540.817	627.211	837.957	570.873	1.46736	0.553226	7.32644e-06	0.000746332
ENSRNOG00000029543	Cish	360.919	347.924	345.154	227.167	281.385	213.252	351.332	240.601	1.46046	0.546421	0.000675484	0.0273967
ENSRNOG00000028461	Gnl3	449.871	416.734	419.187	340.75	300.343	242.2	428.597	294.431	1.4563	0.542309	0.000598336	0.0251205
ENSRNOG00000018279	Sfxn1	585.855	539.816	528.235	334.665	438.042	367.642	551.302	380.116	1.45015	0.536204	0.000163785	0.00908143
ENSRNOG00000012864	Ern1	3077.53	3211.76	2973.33	2142.87	2127.35	2131.55	3087.54	2133.92	1.44693	0.532993	3.08891e-10	1.15975e-07
ENSRNOG00000018321	Sytl3	675.829	553.384	728.325	458.39	406.112	489.225	652.512	451.242	1.44558	0.531644	0.000209455	0.0111436
ENSRNOG00000017801	Atf4	6354.43	6564.04	6804.03	4874.95	5004.06	3804.76	6574.17	4561.26	1.44139	0.527461	1.69284e-06	0.000226996
ENSRNOG00000050997	Ifrd1	728.995	600.872	671.299	471.573	474.961	451.592	667.056	466.042	1.4311	0.517121	4.36744e-05	0.00329842
ENSRNOG00000014832	Mapkapk3	714.681	693.91	625.279	515.181	466.979	440.978	677.957	474.379	1.42943	0.515443	4.54468e-05	0.00339469
ENSRNOG00000013874	Rplp1	9908.41	8624.45	9109.06	5195.42	7058.57	7086.52	9213.97	6446.84	1.42916	0.515168	1.99456e-05	0.00174737
ENSRNOG00000012683	Abhd17c	1438.56	1421.74	1630.73	1006.02	1133.52	1020.91	1497.01	1053.48	1.421	0.506903	2.26258e-06	0.000274572
ENSRNOG00000029410	RGD1562469	655.38	500.081	722.322	437.093	422.077	464.136	625.928	441.102	1.41855	0.504415	0.000877277	0.0327508
ENSRNOG00000011494	Rpl36al	1808.69	1336.46	1612.72	921.85	1118.55	1319.07	1585.95	1119.83	1.41585	0.501672	0.000573758	0.0242436
ENSRNOG00000018991	Gsn	4930.18	4652.88	4204.87	3314.2	3423.51	3024.12	4595.98	3253.94	1.41247	0.49822	2.37914e-07	3.9575e-05
ENSRNOG00000058586	Tyro3	799.543	737.522	802.358	569.945	553.789	533.612	779.808	552.449	1.41154	0.497273	1.25127e-05	0.00116616
ENSRNOG00000020255	Sars	1968.19	1964.46	2068.92	1405.59	1739.2	1107.75	2000.52	1417.51	1.41145	0.497178	0.00039939	0.0185455
ENSRNOG00000007587	Tcp11l2	517.352	533.032	608.271	370.16	390.147	418.784	552.885	393.03	1.40646	0.49207	0.000230262	0.0121035
ENSRNOG00000042556	Bmyc	432.49	474.883	440.196	317.425	291.363	349.308	449.189	319.365	1.40639	0.491992	0.000474913	0.0210129
ENSRNOG00000008614	Zfyve1	438.624	435.148	431.192	311.34	265.42	351.238	434.988	309.333	1.4058	0.49139	0.000948532	0.0353106
ENSRNOG00000013304	Arg1	1553.08	1405.27	1619.72	1107.44	1318.12	853.007	1526.02	1092.85	1.39651	0.481831	0.000814337	0.0308513
ENSRNOG00000047339	Pja1	761.713	855.758	783.349	583.129	524.852	615.632	800.274	574.538	1.39292	0.478116	7.06652e-05	0.00486184
ENSRNOG00000029698	Pim3	2239.13	2045.87	1851.83	1610.45	1254.26	1547.76	2045.61	1470.82	1.39074	0.475854	7.82982e-05	0.00518914
ENSRNOG00000010298	Xbp1	14936.7	12265.5	11930.3	8235.8	10794.4	9318.43	13044.2	9449.54	1.38038	0.465065	8.90254e-05	0.00570675
ENSRNOG00000006305	Slc38a2	3973.18	3777.74	3840.71	2851.75	3356.66	2217.43	3863.88	2808.61	1.37581	0.460277	0.000406788	0.0186909
ENSRNOG00000010800	Hadhb	2158.36	2136	2543.13	1636.82	1730.22	1609.52	2279.16	1658.85	1.37395	0.458327	8.47381e-06	0.000831002
ENSRNOG00000008639	Pabpc1	19084.8	17770.3	19310.6	12070.3	15153.9	14053.4	18721.9	13759.2	1.36066	0.444312	6.64844e-06	0.000704574
ENSRNOG00000002342	Aldh3a2	536.778	516.556	555.247	407.683	375.18	405.275	536.194	396.046	1.35375	0.436963	0.000542188	0.0232081
ENSRNOG00000017895	Eno1	4983.34	5614.28	5962.66	3982.51	4128.97	4129.94	5520.09	4080.48	1.35283	0.435977	2.56934e-06	0.000306943
ENSRNOG00000047620	Golph3l	574.608	651.268	696.31	423.909	503.898	495.014	640.729	474.274	1.35089	0.433914	0.00120109	0.0422018
ENSRNOG00000002393	Eprs	3689.96	3812.63	4454.99	2735.13	3616.09	2607.27	3985.86	2986.16	1.33481	0.416638	0.0012706	0.0439058
ENSRNOG00000004196	Rps29	5554.88	4093.68	5303.36	3527.17	3758.78	3917.66	4983.98	3734.54	1.33446	0.416256	0.000375425	0.0176827
ENSRNOG00000015236	Mybbp1a	761.713	794.702	945.421	625.722	643.593	610.807	833.945	626.707	1.33075	0.41224	0.000814657	0.0308513
ENSRNOG00000021144	Cebpg	1490.71	1382.97	1436.64	1077.01	1140.51	1025.73	1436.77	1081.08	1.32902	0.41036	3.62341e-05	0.00283424
ENSRNOG00000056940	Cited2	1061.29	949.766	891.397	773.786	749.361	663.879	967.483	729.009	1.32723	0.408416	0.000629694	0.0258588
ENSRNOG00000025892	Pkn3	874.181	869.326	1063.47	703.811	749.361	663.879	935.66	705.684	1.32597	0.407043	0.000971419	0.0359589
ENSRNOG00000018645	Rpsa	11413.4	9675.01	9720.33	7262.23	7671.23	8393.05	10269.6	7775.5	1.32071	0.40131	4.67686e-05	0.00346072
ENSRNOG00000014710	Prom2	3420.04	4274.91	3868.72	3060.66	2939.57	2815.7	3854.56	2938.64	1.31181	0.391558	0.000127527	0.00751494
ENSRNOG00000006206	Tmem106b	1027.55	879.018	1021.46	737.277	811.226	706.336	976.006	751.613	1.29845	0.376791	0.00134216	0.0452631
ENSRNOG00000014272	Rpl35	4929.15	4050.07	4883.18	3278.7	3715.87	3686.07	4620.8	3560.22	1.2978	0.376065	0.000314289	0.0153645
ENSRNOG00000006353	Gyltl1b	713.659	722.016	684.305	569.945	546.804	517.208	706.66	544.652	1.29768	0.375932	0.0011151	0.0398195
ENSRNOG00000030225	Clpx	1509.11	1454.69	1570.7	1142.93	1170.44	1181.09	1511.5	1164.82	1.29753	0.37577	7.12056e-05	0.0048735
ENSRNOG00000008551	Rps7	6826.79	5437.89	6437.87	4653.87	4784.54	5009.97	6234.18	4816.13	1.29436	0.372238	0.000230022	0.0121035
ENSRNOG00000010989	Ipo5	1108.32	1128.09	1116.5	854.917	889.056	847.218	1117.63	863.73	1.29402	0.371861	0.000181747	0.00974831
ENSRNOG00000013631	Slc31a2	6121.31	5741.24	6360.83	4599.11	4512.13	5164.36	6074.46	4758.53	1.27647	0.352157	0.00011041	0.00674838
ENSRNOG00000004554	Dcn	1900.7	1643.68	1740.78	1400.52	1304.15	1454.17	1761.72	1386.28	1.27064	0.345558	0.00068359	0.0276402
ENSRNOG00000001148	Rplp0	14568.7	13359.7	13368	9957.81	11336.2	11425.9	13765.4	10906.6	1.26209	0.33581	0.000165413	0.00913314
ENSRNOG00000002632	Naca	4222.65	3592.63	3781.69	3020.1	2934.58	3265.36	3865.66	3073.35	1.25768	0.330769	0.000594979	0.0250597
ENSRNOG00000010117	Eif3a	3959.89	4191.57	3923.75	3253.35	3328.72	3384.05	4025.07	3322.04	1.21164	0.276957	0.000704172	0.028212
ENSRNOG00000008195	Ywhaz	3069.35	2937.49	2943.31	3822.28	3764.77	3450.63	2983.38	3679.22	-1.23321	-0.302421	0.000463645	0.0205836
ENSRNOG00000020272	5330417C22Rik	2910.87	3047.97	3449.54	3779.69	3885.5	4113.54	3136.13	3926.24	-1.25196	-0.324191	0.000701278	0.028212
ENSRNOG00000018164	Spcs2	3365.85	3157.49	3283.46	3657.99	4388.4	4236.09	3268.93	4094.16	-1.25252	-0.324836	0.0007459	0.0294351
ENSRNOG00000001518	Itga6	2796.36	2991.76	2954.32	3908.48	4015.22	3159.21	2914.14	3694.31	-1.26761	-0.342106	0.00139186	0.0467787
ENSRNOG00000019900	Slc35b2	983.581	933.29	891.397	1144.96	1224.32	1206.18	936.09	1191.82	-1.27331	-0.348586	0.000617949	0.0256977
ENSRNOG00000033119	Plcb4	2883.26	2789.21	3242.45	4091.03	3392.58	3888.71	2971.64	3790.77	-1.27567	-0.351252	0.00072419	0.028751
ENSRNOG00000022727	Tmem127	929.392	1014.7	925.412	1250.43	1228.31	1189.77	956.501	1222.84	-1.27824	-0.354156	0.000448682	0.0200549
ENSRNOG00000002414	Tfcp2l1	7269.5	9096.43	8545.81	11183.9	9370.51	11372.8	8303.91	10642.4	-1.28159	-0.357929	0.00114871	0.0407979
ENSRNOG00000021440	Pptc7	758.646	819.9	884.394	1040.5	1041.72	1078.8	820.98	1053.68	-1.28339	-0.359957	0.000849826	0.0318164
ENSRNOG00000025164	Bhlha15	5981.24	7604.91	7116.17	10281.3	8085.32	8554.2	6900.77	8973.61	-1.30032	-0.378866	0.00120812	0.0423359
ENSRNOG00000024482	Tnrc18	783.184	962.364	914.408	1190.6	1106.58	1167.58	886.652	1154.92	-1.30228	-0.381043	0.000796578	0.0305735
ENSRNOG00000031208	Mgat1	944.729	923.599	958.427	1329.53	1115.56	1238.98	942.252	1228.03	-1.30328	-0.382147	0.000383443	0.0178682
ENSRNOG00000019964	Taok2	688.098	636.731	596.266	775.814	873.091	862.657	640.365	837.187	-1.3076	-0.38692	0.000976957	0.0360623
ENSRNOG00000045941	Susd6	927.348	1061.22	1090.49	1350.83	1397.94	1280.48	1026.35	1343.08	-1.30837	-0.387776	0.000293094	0.0147055
ENSRNOG00000012192	Znf740	649.246	652.237	609.272	868.101	817.213	825.989	636.918	837.101	-1.31421	-0.394195	0.000320912	0.0156189
ENSRNOG00000000299	Foxo3	738.197	730.738	741.33	966.472	881.073	1062.4	736.755	969.982	-1.31674	-0.396966	0.000480613	0.0211394
ENSRNOG00000010085	Cldn10	1616.47	1336.46	1678.75	2328.46	1805.05	1981.02	1543.89	2038.18	-1.32023	-0.400785	0.00132591	0.0451157
ENSRNOG00000027880	Nbeal2	794.431	952.673	821.366	1272.74	1062.68	1063.36	856.157	1132.93	-1.32288	-0.403687	0.000998396	0.0365458
ENSRNOG00000017154	Atp11a	1497.87	1782.26	1889.84	2447.11	2081.45	2320.68	1723.32	2283.08	-1.32469	-0.405656	0.000363042	0.0173334
ENSRNOG00000042320	Slc41a1	1488.66	1759	2006.89	2359.9	2393.77	2211.64	1751.52	2321.77	-1.32545	-0.406481	0.00048099	0.0211394
ENSRNOG00000014066	Jade1	1658.39	1583.59	1701.76	2055.65	2480.58	2039.88	1647.91	2192.04	-1.3302	-0.411648	0.000111647	0.00679239
ENSRNOG00000004132	Lasp1	3075.48	3076.08	2800.25	4275.6	3849.58	3811.51	2983.94	3978.9	-1.33338	-0.415093	6.16016e-06	0.00066353
ENSRNOG00000007104	Itpr1	827.149	919.722	1090.49	1368.07	1126.54	1289.16	945.786	1261.26	-1.33346	-0.415175	0.00126581	0.0438894
ENSRNOG00000005082	Irf6	1160.46	1131	1148.51	1605.38	1593.52	1390.48	1146.66	1529.79	-1.33402	-0.415777	4.54658e-05	0.00339469
ENSRNOG00000003232	Slc9a3r1	1132.86	1321.92	1189.53	1584.08	1578.55	1710.84	1214.77	1624.49	-1.33716	-0.419173	4.72085e-05	0.00346072
ENSRNOG00000048205	Ube2h	2991.64	2768.86	3212.43	4042.35	3859.56	4097.14	2990.98	3999.68	-1.33732	-0.419344	3.9155e-06	0.000439775
ENSRNOG00000053450	Myadm	660.492	688.095	836.373	946.189	980.855	998.713	728.32	975.253	-1.33908	-0.421245	0.000534674	0.0230366
ENSRNOG00000050834	Fam102a	588.922	698.756	592.264	959.373	796.259	764.233	626.647	839.955	-1.3399	-0.422122	0.00146676	0.0485508
ENSRNOG00000007804	C1galt1	1448.79	1053.46	1135.51	1641.89	1658.37	1586.36	1212.59	1628.87	-1.34355	-0.426055	0.000637456	0.0260149
ENSRNOG00000054058	Osbpl1a	627.774	689.065	732.326	936.048	977.862	842.393	683.055	918.768	-1.3448	-0.427395	0.00029598	0.0147439
ENSRNOG00000009856	Sypl1	591.989	549.507	672.3	782.913	936.951	736.249	604.599	818.705	-1.35415	-0.43739	0.00119655	0.0422018
ENSRNOG00000017210	Slc22a23	577.675	521.402	552.246	845.79	673.527	721.775	550.441	747.031	-1.35717	-0.440597	0.000607882	0.0254041
ENSRNOG00000009161	Clasp2	396.704	439.024	436.194	563.86	621.641	545.191	423.974	576.897	-1.36037	-0.443997	0.000528553	0.0228478
ENSRNOG00000005388	Rassf3	1516.27	1755.13	1875.84	2292.96	2632.24	2091.03	1715.74	2338.74	-1.36296	-0.446743	0.00015361	0.00862645
ENSRNOG00000012420	Bcl9l	405.906	524.309	487.217	712.938	633.614	593.438	472.478	646.664	-1.368	-0.452073	0.00123945	0.0433182
ENSRNOG00000058609	Palmd	449.871	427.394	441.197	610.51	663.549	534.577	439.487	602.879	-1.37164	-0.455906	0.000526102	0.0228168
ENSRNOG00000006328	Wwp1	608.348	689.065	766.342	846.804	1012.79	971.695	687.918	943.761	-1.37188	-0.456151	0.000348409	0.0168085
ENSRNOG00000007584	Ehd4	930.415	1006.95	911.406	1361.99	1300.16	1251.53	949.589	1304.56	-1.37357	-0.457927	7.19922e-06	0.000739101
ENSRNOG00000018225	Tp53inp2	1233.06	1480.86	1453.65	1827.47	2125.35	1782.24	1389.19	1911.69	-1.37592	-0.460401	5.28789e-05	0.00378822
ENSRNOG00000061450	Homer2	462.14	569.859	554.247	686.57	737.388	760.373	528.749	728.11	-1.3768	-0.461317	0.000296201	0.0147439
ENSRNOG00000016281	Col4a1	1352.68	1640.77	1530.68	2302.09	2134.33	1815.05	1508.04	2083.83	-1.38152	-0.46626	7.8355e-05	0.00518914
ENSRNOG00000020161	Zbtb7a	480.544	589.242	586.261	849.846	734.394	715.986	552.016	766.742	-1.38847	-0.473497	0.000349191	0.0168085
ENSRNOG00000017777	Ahcy	829.194	727.831	1123.5	1331.56	1214.34	1180.12	893.508	1242.01	-1.39011	-0.475196	0.00134332	0.0452631
ENSRNOG00000054891	Cnot6	290.371	283.961	322.144	393.485	389.149	464.136	298.825	415.59	-1.39118	-0.476313	0.00124988	0.0435668
ENSRNOG00000003585	Sytl5	309.797	337.264	361.161	470.559	468.975	466.066	336.074	468.533	-1.39393	-0.479159	0.000367151	0.0174178
ENSRNOG00000015124	Gpam	659.47	723.954	696.31	904.61	1002.81	996.783	693.245	968.067	-1.39636	-0.48167	1.22788e-05	0.00115254
ENSRNOG00000012989	Serinc2	559.271	477.79	476.212	719.023	690.49	706.336	504.425	705.283	-1.39851	-0.483894	7.74796e-05	0.00518914
ENSRNOG00000020578	Ceacam1	935.527	875.141	944.421	1404.58	1074.65	1376.97	918.363	1285.4	-1.39978	-0.485197	9.08604e-05	0.00574037
ENSRNOG00000017752	Mccc2	535.755	471.975	551.246	792.041	714.438	684.143	519.659	730.207	-1.40524	-0.490819	8.98875e-05	0.00573404
ENSRNOG00000018574	Qsox2	335.358	358.585	361.161	490.842	487.933	506.594	351.701	495.123	-1.40769	-0.493332	0.00013194	0.00767181
ENSRNOG00000010574	Ptpn1	248.451	228.719	263.117	328.58	329.28	390.801	246.763	349.554	-1.4172	-0.503045	0.00130689	0.0449167
ENSRNOG00000018485	Gpr155	2436.46	2053.63	2877.28	3268.56	3585.16	3604.05	2455.79	3485.92	-1.41959	-0.505475	2.82385e-05	0.00231927
ENSRNOG00000061337	Fam63b	209.599	230.657	258.115	352.92	332.273	306.851	232.79	330.681	-1.42003	-0.505917	0.00148762	0.0489944
ENSRNOG00000030954	Fat1	907.921	1256.99	1259.56	1825.45	1437.86	1602.77	1141.49	1622.02	-1.4207	-0.506601	0.000314516	0.0153645
ENSRNOG00000008659	Arhgap21	923.258	1141.66	1132.5	1619.58	1377.99	1546.8	1065.81	1514.79	-1.42102	-0.50693	1.92508e-05	0.00169782
ENSRNOG00000061876	Tas1r2	271.967	296.559	283.126	453.319	352.23	408.17	283.884	404.573	-1.42479	-0.510745	0.000785254	0.0303501
ENSRNOG00000008243	Slc43a1	565.406	557.26	593.264	762.631	886.062	802.83	571.977	817.174	-1.42876	-0.514765	1.06519e-05	0.00102173
ENSRNOG00000029237	Klk1c2	103676	81469.5	81384.3	133114	133550	115038	88843.2	127234	-1.43212	-0.518152	3.02804e-06	0.000352137
ENSRNOG00000002418	Tgfb2	3992.6	4183.81	3978.77	6349.51	5855.2	5247.35	4051.73	5817.35	-1.43568	-0.521738	3.32551e-08	7.53457e-06
ENSRNOG00000005917	Pawr	191.195	219.028	205.091	325.538	278.391	280.798	205.105	294.909	-1.43714	-0.523202	0.00141942	0.0475831
ENSRNOG00000010789	Dusp7	421.243	420.61	552.246	695.698	615.654	693.792	464.7	668.381	-1.4384	-0.524466	0.000242129	0.0125763
ENSRNOG00000016090	Mtmr10	447.826	494.266	538.24	758.574	699.47	678.353	493.444	712.133	-1.44285	-0.528926	2.50866e-05	0.00212026
ENSRNOG00000000885	Auts2	394.659	445.808	425.189	743.362	546.804	544.226	421.886	611.464	-1.4488	-0.534858	0.00043585	0.0196821
ENSRNOG00000009795	Nfib	328.201	451.623	527.235	646.005	632.617	615.632	435.686	631.418	-1.44882	-0.534881	0.000969934	0.0359589
ENSRNOG00000020185	Wdr6	350.695	378.937	325.145	542.563	446.025	540.367	351.592	509.651	-1.44939	-0.535444	0.000180511	0.00974831
ENSRNOG00000007433	Cyb561	1517.29	1311.26	1377.61	1992.78	2402.75	1739.79	1402.05	2045.1	-1.45867	-0.544652	1.58414e-05	0.00143567
ENSRNOG00000022710	Prrg4	187.105	234.534	210.094	301.199	303.337	317.465	210.578	307.334	-1.45889	-0.544876	0.000765429	0.0298244
ENSRNOG00000019319	Fchsd2	220.846	219.997	216.096	342.778	290.365	330.975	218.98	321.373	-1.46759	-0.553447	0.000404224	0.0186383
ENSRNOG00000004310	Caskin2	419.198	456.469	501.223	754.518	641.597	626.246	458.963	674.12	-1.4684	-0.554248	3.52167e-05	0.00278785
ENSRNOG00000011076	Ank2	461.118	417.703	495.221	836.663	539.82	644.58	458.014	673.687	-1.47084	-0.556641	0.00062706	0.0258588
ENSRNOG00000012951	Kctd9	232.092	228.719	203.091	370.16	318.304	291.412	221.301	326.625	-1.47548	-0.561181	0.00065067	0.026472
ENSRNOG00000005175	Sgpp1	824.082	918.753	899.401	1333.59	1332.09	1239.95	880.745	1301.87	-1.47786	-0.563506	4.84395e-08	1.01054e-05
ENSRNOG00000008401	Card10	376.256	478.759	410.183	720.037	571.75	583.789	421.733	625.192	-1.48171	-0.567264	0.000115258	0.00691603
ENSRNOG00000017195	Ctr9	807.723	889.678	1016.45	1186.54	1522.67	1312.32	904.618	1340.51	-1.48181	-0.567357	1.04461e-05	0.00100936
ENSRNOG00000025998	Aim1	174.836	191.891	163.073	260.633	260.431	264.394	176.6	261.819	-1.4822	-0.567744	0.000708425	0.0282961
ENSRNOG00000004084	Fam84a	462.14	520.433	491.219	846.804	678.516	660.019	491.264	728.446	-1.48227	-0.567808	3.04022e-05	0.00245102
ENSRNOG00000012942	Satb1	478.499	423.518	536.239	738.291	639.601	756.513	479.419	711.469	-1.48438	-0.56986	2.53315e-05	0.00212026
ENSRNOG00000054515	Fgd6	269.923	351.801	383.171	579.072	444.029	471.856	334.965	498.319	-1.48704	-0.57244	0.000622679	0.0258127
ENSRNOG00000001158	Abcg1	346.605	369.246	353.157	563.86	468.975	559.665	356.336	530.833	-1.48958	-0.574907	2.61201e-05	0.00217243
ENSRNOG00000016562	Zfp191	240.272	340.171	334.149	444.192	472.966	447.732	304.864	454.963	-1.49163	-0.57689	0.000313569	0.0153645
ENSRNOG00000003219	Trim16	395.682	342.109	465.207	640.934	585.719	570.28	401	598.978	-1.49391	-0.579089	6.02207e-05	0.00423758
ENSRNOG00000011305	Sox10	1762.68	1913.1	1719.77	3020.1	2468.6	2618.85	1798.51	2702.52	-1.50249	-0.587351	2.36203e-08	5.74804e-06
ENSRNOG00000017403	Apobr	245.384	211.274	226.101	364.075	360.212	302.026	227.586	342.105	-1.50323	-0.58807	0.000235482	0.0123286
ENSRNOG00000018689	RGD1305464	1117.52	1049.59	1244.55	1648.99	1826.01	1653.91	1137.22	1709.63	-1.50343	-0.588261	3.084e-08	7.23693e-06
ENSRNOG00000039300	Ahcyl2	389.547	353.739	362.161	628.765	514.874	519.138	368.483	554.259	-1.50412	-0.588915	2.20555e-05	0.00188202
ENSRNOG00000016477	Vangl1	251.519	283.961	271.121	412.754	379.171	431.328	268.867	407.751	-1.51632	-0.600576	3.35926e-05	0.0026754
ENSRNOG00000003649	Qsox1	883.383	993.377	862.384	1461.37	1419.9	1273.72	913.048	1385	-1.51652	-0.600769	4.68807e-08	1.00993e-05
ENSRNOG00000017510	Mfge8	332.291	342.109	503.224	721.051	583.724	482.47	392.542	595.748	-1.51737	-0.601574	0.00131875	0.0450123
ENSRNOG00000036693	Slc25a10	400.794	459.376	343.153	526.337	609.667	695.722	401.108	610.575	-1.52223	-0.606189	8.66875e-05	0.00558412
ENSRNOG00000021611	Clip2	551.092	565.014	541.241	1042.53	876.084	609.842	552.449	842.82	-1.52518	-0.608982	0.000291832	0.0147055
ENSRNOG00000001823	St6gal1	2889.4	3030.53	3309.47	4660.97	5062.93	4474.43	3076.47	4732.78	-1.53833	-0.621366	3.52854e-11	1.54562e-08
ENSRNOG00000013994	Enpp1	202.442	256.824	218.097	431.008	349.236	263.429	225.788	347.891	-1.53961	-0.622563	0.00147984	0.0488609
ENSRNOG00000016872	Lppr4	517.352	503.957	555.247	879.256	753.353	804.76	525.519	812.456	-1.54599	-0.628532	1.55999e-07	2.77024e-05
ENSRNOG00000008065	Wwc1	1137.97	1402.36	1391.62	2214.87	2046.52	1856.55	1310.65	2039.31	-1.55564	-0.637506	3.89101e-08	8.52196e-06
ENSRNOG00000036816	Wls	2315.81	2600.23	2598.16	4129.56	3760.78	3801.86	2504.73	3897.4	-1.55588	-0.637732	5.12428e-12	2.69352e-09
ENSRNOG00000002449	Maged2	371.144	374.091	329.147	561.832	600.686	513.348	358.127	558.622	-1.55957	-0.641152	1.965e-06	0.000253158
ENSRNOG00000021573	Dpy19l3	621.64	735.584	710.317	1156.12	1169.44	915.728	689.18	1080.43	-1.5672	-0.648186	6.83033e-07	9.86345e-05
ENSRNOG00000017672	Akr1c14	637.999	576.643	562.251	1139.89	599.689	1055.64	592.298	931.741	-1.5732	-0.6537	0.000562182	0.0239082
ENSRNOG00000029514	Slc26a9	343.538	499.111	410.183	708.881	607.671	656.159	417.611	657.571	-1.5738	-0.654252	1.65344e-05	0.00148821
ENSRNOG00000003931	Arsg	379.323	477.79	298.133	751.475	621.641	458.347	385.082	610.487	-1.58459	-0.664105	0.000734297	0.0290645
ENSRNOG00000006010	Slc6a20	345.583	301.405	345.154	516.196	582.726	480.54	330.714	526.487	-1.59219	-0.671012	2.06324e-06	0.000263233
ENSRNOG00000049279	LOC100911764	9778.56	9368.76	9848.39	16707.9	17033.8	12773.9	9665.24	15505.2	-1.6042	-0.681855	8.36579e-10	2.81884e-07
ENSRNOG00000000054	Abhd8	139.051	124.051	130.058	262.661	197.568	170.794	131.053	210.341	-1.60453	-0.682149	0.00131371	0.0449568
ENSRNOG00000003827	Wipi1	280.147	324.665	349.156	595.298	527.846	410.1	317.989	511.081	-1.60646	-0.683886	3.87277e-05	0.00297615
ENSRNOG00000022943	Dgka	179.948	193.83	170.076	318.439	283.38	274.043	181.285	291.954	-1.6098	-0.686884	3.64704e-05	0.00283584
ENSRNOG00000019322	Notch1	247.429	261.67	348.155	493.884	377.175	517.208	285.751	462.756	-1.61956	-0.695601	9.06662e-05	0.00574037
ENSRNOG00000023972	Col4a2	597.101	752.059	675.301	1156.12	1170.44	962.045	674.821	1096.2	-1.62383	-0.699398	6.03204e-08	1.20851e-05
ENSRNOG00000008422	Lpo	9134.42	9648.84	11837.3	17360	17651.4	14874.6	10206.8	16628.6	-1.62915	-0.704117	4.41543e-10	1.56819e-07
ENSRNOG00000061102	Taf9b	81.7947	92.0691	109.049	148.064	167.633	145.706	94.3041	153.801	-1.63045	-0.705273	0.00143283	0.0478213
ENSRNOG00000000145	Pik3r3	90.9966	104.668	113.05	177.474	192.579	136.057	102.905	168.703	-1.63829	-0.712191	0.00144366	0.0479071
ENSRNOG00000011726	Grin1	235.16	345.986	308.137	571.973	458.996	427.469	296.428	486.146	-1.63887	-0.712698	4.74035e-05	0.00346072
ENSRNOG00000022753	Mast3	164.612	186.077	185.082	310.326	292.361	276.938	178.59	293.208	-1.64106	-0.714629	1.40991e-05	0.00129564
ENSRNOG00000016299	Klf4	145.186	119.205	120.054	185.587	208.544	240.27	128.148	211.467	-1.65152	-0.723799	0.000282617	0.0143393
ENSRNOG00000003749	Xk	164.612	144.403	154.069	272.803	287.372	207.462	154.361	255.879	-1.65748	-0.728993	0.000130845	0.0076419
ENSRNOG00000033528	Tll1	474.409	378.937	630.281	959.373	755.348	750.724	494.542	821.815	-1.66192	-0.732848	2.65905e-05	0.00219765
ENSRNOG00000048043	F2r	141.096	124.051	111.049	199.785	252.448	173.689	125.399	208.641	-1.6638	-0.734482	0.000537874	0.0230987
ENSRNOG00000017854	Ucp2	1487.64	1269.58	1976.88	3072.83	2654.2	2189.45	1578.04	2638.83	-1.67222	-0.741764	2.24994e-06	0.000274572
ENSRNOG00000013927	Jag2	146.208	189.953	210.094	412.754	289.367	212.287	182.085	304.803	-1.67278	-0.742247	0.00152568	0.0499973
ENSRNOG00000012404	Thrsp	370.121	364.4	667.297	891.426	759.34	715.986	467.273	788.917	-1.68831	-0.75558	0.000158185	0.00884554
ENSRNOG00000018126	Abca1	317.977	202.552	321.143	367.117	475.959	577.999	280.557	473.692	-1.6896	-0.756681	0.000209457	0.0111436
ENSRNOG00000018666	Gpsm1	145.186	222.904	184.082	370.16	308.326	257.639	184.057	312.042	-1.69366	-0.760147	0.000171262	0.00933838
ENSRNOG00000020865	Ano1	2333.19	3042.16	3271.46	5186.29	4673.78	4790.93	2882.27	4883.67	-1.69426	-0.760652	3.53019e-10	1.28862e-07
ENSRNOG00000008425	Nav1	145.186	216.12	171.076	364.075	283.38	255.709	177.461	301.055	-1.69478	-0.761098	0.000168037	0.00920074
ENSRNOG00000049162	Prr15l	263.788	210.305	295.132	423.909	482.944	400.45	256.408	435.768	-1.70003	-0.765563	3.57058e-06	0.000411588
ENSRNOG00000018243	Ubfd1	301.618	279.115	265.118	474.616	514.874	448.697	281.95	479.396	-1.70036	-0.765841	5.23231e-08	1.07434e-05
ENSRNOG00000007591	Slc45a3	170.746	100.791	121.054	241.364	251.45	179.479	130.864	224.098	-1.71342	-0.776881	0.000780335	0.0302489
ENSRNOG00000050404	Pmepa1	155.41	193.83	130.058	234.266	381.167	208.427	159.766	274.62	-1.718	-0.780727	0.00118358	0.0419231
ENSRNOG00000045829	Thbs1	487.701	614.44	656.292	1385.31	684.503	954.326	586.145	1008.05	-1.71947	-0.78196	0.000102724	0.00639759
ENSRNOG00000015888	Larp4b	720.816	844.128	994.443	1711.86	1578.55	1126.09	853.129	1472.17	-1.72527	-0.786822	7.95401e-07	0.000113613
ENSRNOG00000019656	Btd	194.262	215.151	255.114	445.206	383.162	320.36	221.509	382.909	-1.72788	-0.789006	8.25902e-06	0.000816028
ENSRNOG00000030021	Ccl6	302.64	230.657	276.123	375.231	569.754	462.206	269.807	469.064	-1.73932	-0.798523	8.24828e-06	0.000816028
ENSRNOG00000002305	Slc15a2	98.1537	91.1	174.078	204.856	241.472	189.128	121.11	211.819	-1.74916	-0.806658	0.00126389	0.0438894
ENSRNOG00000061603	Asxl1	170.746	176.385	165.074	315.396	309.324	276.938	170.735	300.553	-1.75981	-0.815418	6.7916e-07	9.86345e-05
ENSRNOG00000013166	Wnt4	258.676	240.349	181.081	440.135	453.009	308.781	226.702	400.642	-1.76685	-0.821183	2.04098e-05	0.0017762
ENSRNOG00000013973	Lcn2	119.625	118.236	125.056	176.46	241.472	223.866	120.972	213.933	-1.76896	-0.822904	4.05829e-05	0.00310058
ENSRNOG00000029784	Pak1	113.49	124.051	93.0415	200.799	212.535	172.724	110.194	195.353	-1.77183	-0.825238	7.2753e-05	0.00495361
ENSRNOG00000013213	Epha4	115.535	98.8531	119.053	214.997	203.555	173.689	111.147	197.414	-1.77629	-0.828871	4.30305e-05	0.00326858
ENSRNOG00000021237	RGD1565616	293.439	288.806	281.125	493.884	416.09	628.176	287.79	512.717	-1.78208	-0.833564	5.44584e-07	8.18194e-05
ENSRNOG00000025416	Dpy19l4	239.25	194.799	162.072	318.439	431.057	315.535	198.707	355.011	-1.78702	-0.837553	1.55827e-05	0.00142203
ENSRNOG00000011478	Ackr4	83.8396	133.742	156.07	248.463	203.555	221.936	124.551	224.652	-1.8024	-0.84992	0.000223748	0.0118559
ENSRNOG00000046005	Scd2	2485.54	3036.34	2678.19	4645.76	3661.99	6477.64	2733.36	4928.47	-1.80309	-0.850472	1.31165e-07	2.39395e-05
ENSRNOG00000014714	Trpv6	177.903	139.557	162.072	246.435	320.3	298.167	159.844	288.3	-1.80489	-0.851913	3.64256e-06	0.000412645
ENSRNOG00000006116	Hk2	149.275	191.891	162.072	333.651	262.426	318.43	167.746	304.836	-1.81623	-0.860947	1.88014e-06	0.000244623
ENSRNOG00000015895	B4galt6	442.714	405.104	590.263	773.786	1060.68	795.111	479.36	876.526	-1.82869	-0.87081	1.79241e-07	3.09922e-05
ENSRNOG00000007597	Rhpn1	117.58	164.755	68.0303	234.266	221.516	187.198	116.788	214.327	-1.83359	-0.874669	0.0010465	0.0378599
ENSRNOG00000011573	Csad	321.044	298.498	308.137	742.348	484.94	484.4	309.226	570.563	-1.8448	-0.883467	5.47912e-07	8.18194e-05
ENSRNOG00000027924	Fam83g	76.6825	61.0564	62.0276	142.993	106.767	121.582	66.5888	123.781	-1.85963	-0.895015	0.000401236	0.0185657
ENSRNOG00000060773	Sertad4	125.759	133.742	89.0397	223.11	249.455	177.549	116.181	216.705	-1.86427	-0.898611	5.33308e-05	0.00378822
ENSRNOG00000005964	Nr4a3	214.711	250.04	192.086	556.761	338.26	337.729	218.946	410.917	-1.87578	-0.907488	1.28976e-05	0.00119358
ENSRNOG00000008635	Mks1	58.2787	68.8095	81.0361	128.795	137.699	124.477	69.3748	130.324	-1.87775	-0.909008	0.000181184	0.00974831
ENSRNOG00000020985	Atp4a	65.4358	98.8531	58.0259	174.431	142.688	105.178	74.1049	140.766	-1.89668	-0.923476	0.00103001	0.0375382
ENSRNOG00000051704	Zfp185	107.356	101.761	108.048	249.478	190.583	164.04	105.721	201.367	-1.90396	-0.929005	2.15937e-05	0.00185466
ENSRNOG00000009448	Papln	97.1312	202.552	134.06	295.114	280.387	259.569	144.581	278.357	-1.92292	-0.943299	5.19189e-05	0.00374872
ENSRNOG00000054274	Cacnb3	116.557	114.36	157.07	297.142	205.551	253.779	129.329	252.157	-1.94973	-0.963271	5.23464e-06	0.000573237
ENSRNOG00000034134	Cpm	215.734	237.441	303.135	525.323	490.926	463.171	252.103	493.14	-1.95569	-0.967681	1.40175e-09	4.38581e-07
ENSRNOG00000046257	Ctdspl	478.499	462.284	574.256	1076	996.82	894.5	505.013	989.106	-1.95847	-0.969729	1.01581e-13	8.34295e-11
ENSRNOG00000051964	AABR07072711.1	1756.54	1243.42	1326.59	3307.1	3021.39	2159.54	1442.18	2829.34	-1.96194	-0.972278	9.46036e-10	3.10797e-07
ENSRNOG00000004110	Trib2	57.2563	140.527	117.052	227.167	165.638	230.621	104.945	207.808	-1.97809	-0.984109	0.000440705	0.0198332
ENSRNOG00000042855	Ahdc1	279.124	309.158	336.15	699.754	611.662	554.841	308.144	622.086	-2.01809	-1.01299	2.47391e-12	1.47771e-09
ENSRNOG00000006170	Bach2	200.397	205.459	208.093	417.824	401.123	428.433	204.65	415.794	-2.03172	-1.0227	2.17255e-12	1.3595e-09
ENSRNOG00000011452	Aldoc	50.0993	30.0436	56.025	99.3854	80.8233	98.4239	45.3893	92.8775	-2.04895	-1.03488	0.00082121	0.0310101
ENSRNOG00000001984	Kcne1	313.887	250.04	218.097	413.768	541.815	652.3	260.675	535.961	-2.05718	-1.04067	3.78466e-08	8.42953e-06
ENSRNOG00000022523	Fkbp5	442.714	271.362	418.186	749.447	998.816	604.053	377.421	784.105	-2.07811	-1.05527	1.29094e-07	2.39098e-05
ENSRNOG00000002583	Serpinb11	119.625	30.0436	87.0388	178.488	179.607	150.531	78.9024	169.542	-2.15167	-1.10546	0.00133526	0.0452233
ENSRNOG00000009411	Chn2	29.6506	31.9819	30.0134	66.933	71.8429	58.8614	30.5486	65.8791	-2.15538	-1.10794	0.000839367	0.0316049
ENSRNOG00000009005	Slco2a1	229.025	116.298	214.095	433.036	441.036	339.659	186.473	404.577	-2.17105	-1.1184	4.97011e-07	7.59445e-05
ENSRNOG00000020918	Ccnd1	491.791	575.674	606.27	1202.77	1329.09	1110.65	557.912	1214.17	-2.17572	-1.1215	1.92944e-19	4.22579e-16
ENSRNOG00000019752	Slc29a1	142.118	161.848	164.073	407.683	360.212	257.639	156.013	341.845	-2.18973	-1.13075	1.00817e-08	2.70375e-06
ENSRNOG00000032327	Pdia5	181.993	107.575	59.0263	305.255	224.509	240.27	116.198	256.678	-2.21014	-1.14414	0.000119597	0.00714373
ENSRNOG00000024207	Fgfrl1	40.8974	51.3649	52.0232	128.795	91.7993	99.3889	48.0951	106.661	-2.21564	-1.14772	4.73093e-05	0.00346072
ENSRNOG00000053979	Egf	6763.4	5242.12	6172.75	15567	14358.6	10359.6	6059.43	13428.4	-2.21614	-1.14805	2.12553e-16	2.79316e-13
ENSRNOG00000049236	LOC100911597	324.112	188.015	206.092	752.489	421.079	515.278	239.406	562.949	-2.35235	-1.2341	6.0697e-08	1.20851e-05
ENSRNOG00000001227	Adarb1	124.737	120.174	136.061	318.439	314.313	268.253	126.991	300.335	-2.36476	-1.2417	2.68858e-12	1.53612e-09
ENSRNOG00000054979	AABR07003250.1	1015.28	933.29	763.34	2783.8	2446.65	1674.17	903.969	2301.54	-2.54588	-1.34817	2.60118e-16	2.88729e-13
ENSRNOG00000003648	Cldn6	55.2114	52.334	58.0259	146.036	143.686	132.197	55.1904	140.639	-2.54836	-1.34957	2.11051e-08	5.23287e-06
ENSRNOG00000034139	Lyc2	149.275	137.619	160.071	365.089	217.524	588.614	148.989	390.409	-2.62145	-1.39036	2.5422e-07	4.17588e-05
ENSRNOG00000048016	Mff	25.5608	37.7968	23.0103	94.3147	87.808	45.3522	28.7893	75.825	-2.62847	-1.39423	0.00027148	0.0138814
ENSRNOG00000001452	Fzd9	90.9966	104.668	73.0325	349.877	136.701	224.831	89.5657	237.136	-2.64628	-1.40397	1.73588e-06	0.000230417
ENSRNOG00000011271	Mcc	22.4935	40.7042	27.012	89.244	66.8538	85.8797	30.0699	80.6592	-2.67724	-1.42075	3.26729e-05	0.00261802
ENSRNOG00000038916	Dram1	24.5384	21.3213	26.0116	76.0602	65.856	51.1418	23.9571	64.3527	-2.68589	-1.4254	8.55834e-05	0.00555404
ENSRNOG00000007467	Ace	181.993	272.331	120.054	560.818	502.9	525.892	191.459	529.87	-2.76561	-1.4676	3.4413e-11	1.54562e-08
ENSRNOG00000027245	Tdrp	28.6281	25.1979	42.0187	115.612	113.751	43.4223	31.9482	90.9284	-2.84499	-1.50842	0.000151777	0.0085601
ENSRNOG00000010447	Tmod2	20.4487	16.4755	24.0107	84.1733	60.8669	38.5976	20.3116	61.2126	-3.01304	-1.59122	0.000127073	0.00751494
ENSRNOG00000002636	Abat	18.4038	13.5681	10.0045	67.9471	23.9476	55.0016	13.9921	48.9655	-3.50235	-1.80832	0.000282569	0.0143393
ENSRNOG00000007545	Angptl4	32.7179	45.55	38.0169	138.937	140.692	129.302	38.7616	136.31	-3.51176	-1.81219	1.00858e-11	4.90877e-09
ENSRNOG00000059461	B4galt1	563.361	488.451	997.445	2265.58	2698.1	2250.24	683.085	2404.64	-3.52037	-1.81573	3.31378e-08	7.53457e-06
ENSRNOG00000031665	Ace2	13.2916	10.6606	5.00223	58.8199	28.9367	26.0534	9.6515	37.9367	-3.9296	-1.97438	0.000416749	0.0190819
ENSRNOG00000026503	Xrra1	5.11217	8.72234	5.00223	23.3251	14.9673	45.3522	6.27891	27.8815	-4.43512	-2.14897	0.000985622	0.0362803
ENSRNOG00000006096	Slc26a7	7.15704	14.5372	19.0085	80.1168	59.8691	58.8614	13.5676	66.2824	-4.87429	-2.28519	8.16986e-08	1.60239e-05
ENSRNOG00000016818	Fgfr3	54.189	44.5808	43.0192	303.227	273.402	115.793	47.263	230.807	-4.88323	-2.28784	7.30227e-13	4.79795e-10
ENSRNOG00000029212	Vcan	7.15704	9.69149	8.00357	38.5372	46.8975	39.5626	8.28403	41.6657	-5.0221	-2.32829	2.942e-06	0.000345186
ENSRNOG00000018276	Mgat4a	2144.04	1213.37	1293.58	7160.82	8392.65	7805.4	1550.33	7786.29	-5.02263	-2.32844	2.63659e-16	2.88729e-13
ENSRNOG00000049965	LOC100910275	3.0673	7.75319	7.00312	15.212	74.8364	9.6494	5.9412	33.2326	-5.5786	-2.4799	0.00127297	0.0439058
ENSRNOG00000033414	Klk1c3	672.762	577.613	466.208	1159.16	6536.71	1986.81	572.194	3227.56	-5.6407	-2.49587	0.00105158	0.0378599
ENSRNOG00000020117	Brms1	6.1346	5.81489	6.00268	55.7775	38.9149	6.75458	5.98406	33.8157	-5.64508	-2.49699	0.000461751	0.0205691
ENSRNOG00000049814	Rbm39	16.3589	9.69149	4.00178	75.0461	75.8342	23.1586	10.0174	58.0129	-5.79745	-2.53542	6.72101e-06	0.000706567
ENSRNOG00000037984	LOC100910414	6.1346	2.90745	4.00178	49.6927	39.9127	1.92988	4.34794	30.5118	-7.02685	-2.81288	0.00106469	0.038227
ENSRNOG00000013042	Htr1b	4.08974	13.5681	30.0134	185.587	106.767	68.5108	15.8904	120.288	-7.55722	-2.91786	1.97995e-09	5.77678e-07
ENSRNOG00000050660	LOC100911713	5.11217	0.969149	2.00089	57.8058	10.976	10.6143	2.69407	26.4654	-9.87713	-3.30409	0.000236476	0.0123315
ENSRNOG00000036984	Slco1a1	4.08974	0.969149	1.00045	44.622	6.98473	12.5442	2.01978	21.3837	-10.6513	-3.41296	0.000446684	0.0200337
ENSRNOG00000001942	Vcsa1	13203.7	62907.4	241197	1.57918e+06	1.54163e+06	990807	105770	1.37054e+06	-12.9578	-3.69575	0.000128482	0.0075374
ENSRNOG00000001945	Vcsa2	7.15704	30.0436	90.0401	1078.03	564.765	193.953	42.4136	612.248	-14.4336	-3.85136	0.000363061	0.0173334
ENSRNOG00000049491	LOC100909630	3.0673	1.9383	0	1.01414	32.928	42.4574	1.66853	25.4665	-15.3109	-3.93649	0.000305305	0.0150828
ENSRNOG00000033588	Siglec15	0	3.87659	0	50.7068	30.9324	6.75458	1.2922	29.4646	-22.3587	-4.48277	1.75307e-05	0.00156715
ENSRNOG00000012521	Shisa2	1.02243	0.969149	3.00134	19.2686	58.8713	33.7729	1.66431	37.3043	-22.4464	-4.48841	1.19797e-07	2.28153e-05
ENSRNOG00000018522	Echs1	12.2692	9.69149	4.00178	225.138	7.98254	420.714	8.65416	217.945	-25.1888	-4.65471	0.000370622	0.0175192
ENSRNOG00000053118	AABR07024068.1	8.17947	5.81489	2.00089	6.08482	318.304	120.618	5.33175	148.335	-27.8323	-4.79869	0.000419003	0.0191185
ENSRNOG00000030857	Cyss	1.02243	6.78404	21.0094	457.376	432.055	114.828	9.60528	334.753	-34.8359	-5.1225	2.77161e-06	0.000328124
ENSRNOG00000059020	AABR07048322.1	1.02243	0	0	368.132	225.507	136.057	0.340811	243.232	-680.595	-9.41065	1.23091e-14	1.07836e-11

## Sheet: mDEGs
gene_id	gene_name	EM1	EM2	EM3	IM1	IM2	IM3	ORC1	ORC2	ORC3	EM	IM	ORC	DEG(IM vs ORC)
ENSRNOG00000043114	Tomm7	75.9214	50.3023	45.4514	48.0062	44.3274	39.4065	74.172	99.8005	98.2307	57.225	43.9134	90.7344	Yes
ENSRNOG00000032708	RT1-Bb	6.47914	5.23692	6.11688	7.14646	6.30826	9.01442	3.86484	3.39519	4.09847	5.94431	7.48972	3.78617	Yes
ENSRNOG00000014087	Kifc3	3.96685	2.867	2.92308	2.15628	2.39064	3.15157	5.06739	4.64293	5.93613	3.25231	2.56616	5.21548	Yes
ENSRNOG00000018476	Fuom	0.180338	0.10664	0.20556	0.0363473	0.0689713	0.106648	0.238635	0.24379	3.55544	0.164179	0.0706555	1.34596	Yes
ENSRNOG00000042344	Smim22	26.8196	33.652	31.9622	23.0234	27.6614	28.8818	40.8409	50.4755	47.6768	30.8112	26.5222	46.3311	Yes
ENSRNOG00000042561	Cks1b	8.51932	11.5387	8.99148	12.4513	10.1463	11.5887	5.41533	6.97553	6.17403	9.68317	11.3954	6.1883	Yes
ENSRNOG00000014872	Sec24d	17.4249	24.2323	19.3622	22.0091	23.015	25.484	12.43	13.719	14.1322	20.3398	23.5027	13.4271	Yes
ENSRNOG00000001633	Tfg	15.1732	23.3437	17.9651	21.2133	20.6717	20.7125	13.6682	10.9369	12.4393	18.8273	20.8658	12.3481	Yes
ENSRNOG00000009823	Naa38	26.0917	21.8354	17.1992	18.5871	21.1836	18.5116	25.0867	36.8141	42.0227	21.7088	19.4275	34.6412	Yes
ENSRNOG00000059613	AABR07065780.1	13.1281	19.9958	20.4056	23.8538	21.3008	17.4486	8.27234	4.60967	12.1383	17.8432	20.8678	8.3401	Yes
ENSRNOG00000010420	Shfm1	46.7242	43.2234	40.7511	43.7689	41.121	38.3075	49.4827	68.3935	65.6992	43.5662	41.0658	61.1918	Yes
ENSRNOG00000004645	Galnt5	5.70736	8.78602	7.15747	7.35587	8.00513	7.8104	4.1685	5.34027	4.93755	7.21695	7.7238	4.81544	Yes
ENSRNOG00000007779	Kank4	3.77005	3.89805	4.78012	4.15545	3.52422	4.13059	6.10869	5.96438	5.95698	4.1494	3.93675	6.01002	Yes
ENSRNOG00000049394	LOC679739	0.875954	0.123328	0.118864	0.378319	0.239295	0	39.1497	37.3372	53.1016	0.372715	0.205871	43.1962	Yes
ENSRNOG00000010944	Hyou1	34.5035	47.2068	34.8165	37.2816	37.591	47.8327	22.677	27.3521	26.6256	38.8422	40.9018	25.5515	Yes
ENSRNOG00000031918	AABR07065789.2	0.420853	3.73296	1.39916	2.33263	0.402393	4.56285	0.397785	0.203189	0	1.85099	2.43263	0.200325	Yes
ENSRNOG00000021232	Ddrgk1	39.3964	37.0738	33.221	35.706	35.8214	35.2228	44.2039	52.2763	52.1151	36.5637	35.5834	49.5318	Yes
ENSRNOG00000003515	Ephx1	63.4454	49.2031	64.9287	52.2399	60.8614	59.7863	67.2819	89.4646	83.9369	59.1924	57.6292	80.2278	Yes
ENSRNOG00000016952	LOC686442	136.156	136.826	126.341	136.418	128.077	122.874	160.978	214.005	205.262	133.108	129.123	193.415	Yes
ENSRNOG00000037402	Myeov2	75.3552	74.1044	70.4844	75.9393	66.0719	72.9749	100.461	99.6129	108.744	73.3147	71.662	102.939	Yes
ENSRNOG00000026048	Gbf1	16.2231	21.2904	19.8739	17.8296	20.2138	19.9635	14.2435	14.8678	15.4017	19.1291	19.3356	14.8377	Yes
ENSRNOG00000009106	C2cd4b	9.37971	5.16135	1.18795	7.71947	3.36311	5.00766	1.92088	1.8869	0.807211	5.243	5.36342	1.53833	Yes
ENSRNOG00000021177	Cox8a	344.887	327.486	329.442	343.328	319.411	339.134	414.387	444.397	488.035	333.939	333.958	448.94	Yes
ENSRNOG00000023348	Tbc1d2	1.57808	1.29912	1.26973	1.40321	1.26034	1.5188	2.71994	2.59943	2.17874	1.38231	1.39412	2.49937	Yes
ENSRNOG00000040005	Ndufa1	1.12623	0.369985	1.42637	1.13496	1.07683	1.11004	0.354831	121.799	90.9306	0.974195	1.10727	71.0282	Yes
ENSRNOG00000050066	AABR07051583.1	5.55292	12.6967	23.6302	12.9826	12.5301	13.5733	3.9889	1.71582	1.45971	13.9599	13.0287	2.38814	Yes
ENSRNOG00000007793	Pnrc1	53.0928	46.1583	42.2702	51.6525	47.1075	39.847	28.4008	37.3111	28.3496	47.1738	46.2023	31.3539	Yes
ENSRNOG00000004107	Rpl23	448.044	526.548	513.435	543.569	486.616	513.967	631.26	707.822	735.879	496.009	514.717	691.654	Yes
ENSRNOG00000006987	Tmem263	13.2842	13.6348	11.8864	13.4611	12.4208	9.91039	5.09873	7.83104	6.82147	12.9351	11.9308	6.58374	Yes
ENSRNOG00000020093	LOC100360573	110.624	113.964	111.552	122.387	121.101	108.442	147.559	171.259	171.026	112.047	117.31	163.281	Yes
ENSRNOG00000015845	Fam129b	90.9411	93.5484	109.595	101.22	103.665	100.541	123.294	128.393	134.303	98.0281	101.809	128.663	Yes
ENSRNOG00000027728	Ibtk	16.6316	19.483	15.4795	13.8578	16.2605	16.7232	9.71545	11.3922	9.94644	17.198	15.6138	10.3514	Yes
ENSRNOG00000013912	Slc30a7	26.3261	38.7829	33.9028	25.6974	32.9598	31.0287	18.6716	21.0889	20.0607	33.004	29.8953	19.9404	Yes
ENSRNOG00000018320	Rps15a	404.897	396.04	369.335	487.797	388.304	389.252	521.554	592.154	598.082	390.091	421.784	570.597	Yes
ENSRNOG00000050123	Gdf5	42.453	51.2668	37.3646	38.5038	42.0295	35.3281	21.4344	26.1524	25.6289	43.6948	38.6205	24.4053	Yes
ENSRNOG00000018774	Rps14	606.028	555.969	512.525	759.166	593.865	533.37	703.416	1094.34	1065.64	558.174	628.8	954.467	Yes
ENSRNOG00000012083	St6galnac2	416.239	403.695	452.334	446.34	428.26	488.718	625	560.677	540.434	424.089	454.439	575.37	Yes
ENSRNOG00000016580	Rps23	464.407	461.407	474.789	618.584	495.606	453.406	668.505	759.099	786.475	466.868	522.532	738.026	Yes
ENSRNOG00000015335	Rpl13	481.784	485.604	525.948	583.458	559.465	530.005	761.97	775.275	811.612	497.779	557.643	782.953	Yes
ENSRNOG00000020853	Scap	12.7319	13.0638	13.0705	13.5277	13.6035	15.5894	19.0141	18.6305	18.3245	12.9554	14.2402	18.6563	Yes
ENSRNOG00000021035	Rpl18	503.643	533.136	514.581	639.134	550.149	562.233	653.58	849.457	862.394	517.12	583.839	788.477	Yes
ENSRNOG00000016660	Cox5b	161.907	102.091	154.42	149.842	158.28	165.931	184.263	228.126	223.04	139.472	158.018	211.81	Yes
ENSRNOG00000000007	Gad1	0.785969	1.40654	2.33796	2.50125	2.05672	2.03862	6.3732	3.95446	4.25258	1.51016	2.19886	4.86008	Yes
ENSRNOG00000042886	Rps28	179.266	150.407	164.456	205.852	179.296	187.384	288.271	253.273	238.056	164.71	190.844	259.867	Yes
ENSRNOG00000005853	Tacr1	11.6285	9.52894	15.8859	14.0887	15.1785	18.9949	25.2548	23.7818	23.5516	12.3478	16.0874	24.196	Yes
ENSRNOG00000005116	AABR07054332.1	73.0836	89.3992	94.7387	105.016	103.502	97.3721	124.502	132.09	142.392	85.7405	101.963	132.995	Yes
ENSRNOG00000022946	Slc22a3	21.1489	19.4644	26.2114	26.3983	27.5026	29.3683	43.3398	36.236	34.9081	22.2749	27.7564	38.1613	Yes
ENSRNOG00000019328	Phgdh	49.3166	57.477	44.3594	62.1236	61.4436	65.743	81.6154	84.1066	81.0246	50.3843	63.1034	82.2489	Yes
ENSRNOG00000022784	AABR07036035.1	0.0751288	0.296174	0.142727	0.757111	0.143667	0.715808	2.29601	1.69271	1.34013	0.171343	0.538862	1.77628	Yes
ENSRNOG00000016411	LOC100360573	256.821	274.3	270.806	378.126	249.639	233.101	303.291	337.855	461.069	267.309	286.955	367.405	No
ENSRNOG00000054624	AC096792.1	1.07334	0.45639	0.460329	2.81087	0.298611	0.555494	0.145899	0.339698	0.310056	0.663353	1.22166	0.265218	No
ENSRNOG00000005975	Rpl30	285.612	298.47	309.274	404.762	146.977	177.329	351.182	459.056	692.462	297.785	243.023	500.9	No
ENSRNOG00000050143	AABR07065815.1	12.9938	0.394034	0.949429	1.00727	1.14682	26.7964	0.755791	0.19303	0.375353	4.7791	9.65016	0.441391	No
ENSRNOG00000020602	Ndufa13	80.8091	79.9756	79.6555	82.1184	80.8281	65.6218	85.9872	119.253	130.578	80.1467	76.1894	111.94	No
ENSRNOG00000045760	Ebna1bp2	2.09454	3.21785	0.292582	7.20146	0	0.0607187	0.291137	0.297426	0.347014	1.86832	2.42073	0.311859	No
ENSRNOG00000045998	Sema6b	1.84991	0.942323	0.987189	0.523667	1.53029	2.19209	0.373279	0.622191	0.604936	1.25981	1.41535	0.533469	No
ENSRNOG00000057284	Cenpb	59.0205	58.2839	58.5955	58.0948	57.7816	55.0028	64.0513	79.5976	78.6419	58.6333	56.9597	74.0969	No
ENSRNOG00000026504	Fam114a1	21.7737	23.7253	20.5933	22.7464	24.2286	21.0445	15.5239	18.3967	13.7453	22.0308	22.6732	15.8886	No
ENSRNOG00000018294	Hspa5	187.327	241.681	182.03	168.461	193.763	259.849	151.158	168.498	155.21	203.679	207.357	158.289	No
ENSRNOG00000060449	AC115322.4	398.51	345.981	332.532	413.391	336.898	308.203	415.378	476.768	501.691	359.008	352.831	464.612	No
ENSRNOG00000020464	Mrpl54	63.3415	72.4869	66.1337	72.8006	67.195	59.0775	78.4241	91.4917	98.5379	67.3207	66.3577	89.4846	No
ENSRNOG00000042950	Slc5a9	5.84522	5.02925	5.376	4.95553	4.95307	6.02033	10.7866	7.45093	6.16999	5.41683	5.30964	8.13583	No
ENSRNOG00000015320	Atp5g2	234.819	258.224	243.946	255.944	259.497	221.09	292.27	306.461	297.962	245.663	245.51	298.898	No
ENSRNOG00000007484	Ehf	196.017	203.845	196.709	207.372	209.141	175.129	168.427	168.111	144.974	198.857	197.214	160.504	No
ENSRNOG00000058862	AABR07051308.1	1.77821	0.0565329	0.136217	1.50296	0.0822683	0.0282686	0.0271087	0.0276944	0.0538527	0.656986	0.537833	0.0362186	No
ENSRNOG00000001170	Cox6a1	279.94	247.904	270.337	287.541	268.497	265.294	306.171	379.59	397.368	266.06	273.777	361.043	No
ENSRNOG00000004185	Mon2	12.956	14.1995	12.3526	12.5444	13.6254	12.3168	9.12438	11.1204	10.2214	13.1694	12.8288	10.1554	No
ENSRNOG00000033473	Rpl36	751.341	762.543	740.913	918.583	768.393	644.382	885.321	959.807	1100.56	751.599	777.119	981.897	No
ENSRNOG00000012236	Hddc3	68.5389	77.2128	65.5358	81.4987	67.6107	69.0485	93.2556	87.2172	85.795	70.4292	72.7193	88.756	No
ENSRNOG00000048118	Ankra2	0.123653	1.4624	1.2137	0.166148	0.0788192	1.70626	0.155833	0	0.0773924	0.933251	0.650409	0.0777419	No
ENSRNOG00000015496	Tpm4	70.9844	86.1552	71.4737	68.7744	66.7796	82.2624	52.4955	52.0133	61.2136	76.2044	72.6055	55.2408	No
ENSRNOG00000019974	Uba52	437.887	433.438	432.97	480.773	449.626	420.648	485.716	565.761	586.564	434.765	450.349	546.013	No
ENSRNOG00000014493	Golga1	7.12833	6.41063	7.32967	5.72891	7.24164	6.60434	4.73317	4.92146	4.33325	6.95621	6.52496	4.66263	No
ENSRNOG00000001420	Fis1	28.3132	32.4911	26.9555	31.9201	28.4928	31.6653	36.6592	38.8868	42.7848	29.2533	30.6927	39.4436	No
ENSRNOG00000039091	Pnpla8	34.9898	39.7922	34.6047	34.0857	28.6336	42.162	27.3978	27.4266	30.5306	36.4622	34.9604	28.4517	No
ENSRNOG00000018242	Camkk1	16.43	14.3266	17.7846	16.2605	18.9276	16.1317	26.4457	19.5213	20.718	16.1804	17.1066	22.2284	No
ENSRNOG00000025923	Zmiz2	0.677334	0.396921	1.23461	0.645688	0.140027	1.01042	0.190332	0.212121	0.171865	0.76962	0.598712	0.191439	No
ENSRNOG00000024671	Dmxl1	5.80241	6.10157	5.98977	4.78827	6.35011	5.85831	4.65796	4.733	4.07109	5.96459	5.66556	4.48735	No
ENSRNOG00000021132	Trmt112	38.4433	38.8523	40.2346	42.9676	35.0194	47.2602	57.2129	52.7795	56.303	39.1767	41.7491	55.4318	No
ENSRNOG00000061299	AC113925.2	18.0973	21.3778	19.3848	17.7202	26.2621	23.6565	23.899	60.1088	41.331	19.62	22.5463	41.7796	No
ENSRNOG00000049349	Fam19a5	6.06993	4.0899	5.61862	6.866	2.75379	8.48567	8.16676	14.6828	9.76907	5.25948	6.03515	10.8729	No
ENSRNOG00000008140	Rpl15	136.772	143.838	148.203	165.657	141.431	145.751	186.253	188.952	181.055	142.938	150.946	185.42	No
ENSRNOG00000017235	Atp6v0d1	83.7071	89.78	94.2218	85.172	83.1807	85.6467	67.7342	70.1749	70.4618	89.2363	84.6665	69.457	No
ENSRNOG00000025179	LOC100361061	51.0649	48.2465	49.1322	64.4921	46.6802	50.331	64.2298	76.7023	80.6452	49.4812	53.8345	73.8591	No
ENSRNOG00000026833	Ube4a	14.0842	16.5418	17.4843	14.1934	13.7271	17.1316	10.4657	12.033	13.1008	16.0368	15.0174	11.8665	No
ENSRNOG00000024503	Nbas	8.89236	11.6949	10.3519	7.8461	9.61706	11.0239	7.73255	6.73565	6.74365	10.3131	9.49568	7.07061	No
ENSRNOG00000052415	Gstt2	11.1075	5.84604	5.13728	9.02517	5.50474	4.01229	3.73773	2.47078	4.04016	7.36359	6.18073	3.41623	No
ENSRNOG00000020411	Sec23ip	11.0728	11.0044	10.2708	10.1851	11.1023	9.17409	8.23573	8.18044	8.44196	10.7827	10.1538	8.28604	No
ENSRNOG00000046002	LOC301124	53.7124	48.5342	53.6395	57.2409	53.4655	55.6039	65.2065	70.396	70.6181	51.962	55.4368	68.7402	No
ENSRNOG00000006901	Cd320	29.6178	30.5195	38.3267	40.2291	35.5303	30.8241	39.1806	50.4483	48.7038	32.8213	35.5278	46.1109	No
ENSRNOG00000003302	Flcn	23.6711	17.1735	22.5595	19.9934	22.7833	25.6847	27.0864	29.4708	30.5752	21.1347	22.8205	29.0441	No
ENSRNOG00000048017	Igkv5-37	0	0.456852	1.10079	0.934282	0.664823	1.14222	1.31442	2.90943	11.7502	0.519213	0.913774	5.32468	No
ENSRNOG00000048342	Tbca	58.7791	63.8751	54.6338	63.3345	64.1146	63.4652	79.6895	81.953	78.3632	59.096	63.6381	80.0019	No
ENSRNOG00000008190	LOC100911867	7.79	6.98267	7.44979	7.76158	8.49309	7.90388	9.86177	9.64936	11.7313	7.40748	8.05285	10.4142	No
ENSRNOG00000056765	RGD1563861	855.855	929.818	975.492	1089.8	921.254	893.934	1072.14	1112.05	1209.08	920.389	968.331	1131.09	No
ENSRNOG00000004057	Ccdc88a	1.41347	1.26038	1.27869	1.20398	0.868803	1.14438	0.636188	0.552442	0.537121	1.31751	1.07239	0.57525	No
ENSRNOG00000005195	Cst3	175.713	155.606	175.034	190.625	148.332	199.191	190.055	228.291	228.272	168.784	179.383	215.54	No
ENSRNOG00000028358	Edem3	21.5698	26.3479	23.0669	18.7597	23.3796	23.3432	15.8696	20.2713	15.8981	23.6615	21.8275	17.3463	No
ENSRNOG00000036934	Abhd12	19.3337	18.6903	21.9519	22.0897	23.6664	19.946	23.4342	33.4532	28.1322	19.992	21.9007	28.3399	No
ENSRNOG00000006756	Maged1	39.5503	40.3231	40.9999	36.3125	40.3549	33.3457	32.2941	25.4139	28.1908	40.2911	36.671	28.6329	No
ENSRNOG00000014829	Prmt3	3.64126	4.67961	3.62478	4.72629	4.26141	4.47899	5.56174	6.83515	6.01659	3.98188	4.4889	6.13783	No
ENSRNOG00000054626	Rps8	539.169	567.613	557.981	693.05	573.63	554.182	684.773	802.848	796.331	554.921	606.954	761.317	No
ENSRNOG00000000177	Ppap2c	42.9113	36.3197	42.4118	45.4462	40.4117	45.7702	54.2667	56.3503	50.0315	40.5476	43.8761	53.5495	No
ENSRNOG00000025936	Rpl6	477.9	593.907	612.715	646.092	536.632	621.717	710.376	667.879	762.674	561.508	601.48	713.643	No
ENSRNOG00000006824	Hdac11	8.43885	7.94032	9.58882	9.4991	9.59109	10.1694	13.6951	12.146	13.4535	8.656	9.7532	13.0982	No
ENSRNOG00000008338	Bsdc1	48.1264	55.3119	48.1233	47.7177	45.5875	46.2585	37.5357	36.7045	39.8322	50.5205	46.5212	38.0241	No
ENSRNOG00000013895	Npdc1	76.1852	89.4502	78.1405	96.6388	83.3948	81.2558	102.631	94.1358	112.19	81.2586	87.0965	102.986	No
ENSRNOG00000020075	Eef1g	265.738	302.799	323.582	367.557	309.545	298.642	389.273	414.786	405.973	297.373	325.248	403.344	No
ENSRNOG00000026226	Hook1	14.5465	14.0629	14.3862	12.7312	12.5539	13.3298	9.16612	10.2244	10.599	14.3319	12.8716	9.99651	No
ENSRNOG00000005884	Emc7	50.8786	55.3927	48.7945	61.7959	52.2652	54.0846	60.4765	73.0163	69.3466	51.6886	56.0486	67.6131	No
ENSRNOG00000010746	Rpl32	447.255	498.479	467.66	585.82	471.306	507.841	560.347	680.35	735.72	471.131	521.655	658.805	No
ENSRNOG00000003583	Smyd2	22.2371	20.3647	20.6403	24.9164	22.0869	23.4187	28.984	32.9928	28.1217	21.0807	23.474	30.0328	No
ENSRNOG00000002735	Dhx9	17.0763	18.2914	16.6178	15.8864	15.1455	17.3557	13.8756	14.2856	12.9968	17.3285	16.1292	13.7193	No
ENSRNOG00000034254	Actb	460.57	524.871	453.657	468.241	447.219	429.884	368.143	400.727	388.268	479.699	448.448	385.713	No
ENSRNOG00000002389	Morf4l2	53.6616	62.819	52.2317	53.944	47.8423	50.1458	33.0894	43.365	44.1958	56.2375	50.644	40.2167	No
ENSRNOG00000018748	Slc16a11	15.0085	11.2581	13.3059	16.4273	14.6292	14.2586	18.9539	19.2426	22.7404	13.1908	15.105	20.3123	No
ENSRNOG00000007575	Lppr1	1.44118	2.01599	2.20798	2.57675	2.62257	1.97032	3.77896	4.48906	3.66624	1.88838	2.38988	3.97809	No
ENSRNOG00000016272	Edf1	120.001	139.897	143.814	153.282	153.021	131.508	177.087	168.288	174.909	134.571	145.937	173.428	No
ENSRNOG00000048456	Rpl8	8.88467	8.75632	8.14497	9.36998	11.4583	9.36795	13.7683	12.5694	15.7125	8.59532	10.0654	14.0167	No
ENSRNOG00000013251	Trim24	14.0982	14.1378	13.5382	13.2749	12.2705	12.0713	11.1969	10.3664	8.6308	13.9247	12.5389	10.0647	No
ENSRNOG00000000954	Rpo1-3	46.2096	40.4819	38.217	45.4651	42.9756	48.3663	53.7009	55.9989	55.5523	41.6362	45.6023	55.084	No
ENSRNOG00000003549	Cnpy2	66.3413	78.4121	69.0286	84.0538	72.3178	75.4172	86.4086	94.6194	93.0484	71.2607	77.2629	91.3588	No
ENSRNOG00000011104	LOC100363800	179.57	168.823	170.57	226.984	181.58	180.217	225.76	258.094	278.279	172.988	196.26	254.044	No
ENSRNOG00000033030	AABR07072440.1	35.0349	31.5498	35.7586	53.3059	34.8118	28.7085	43.893	49.8826	59.3342	34.1144	38.9421	51.0366	No
ENSRNOG00000019007	Rpl14	423.42	457.914	478.576	564.634	493.761	435.118	556.001	614.254	634.336	453.303	497.838	601.53	No
ENSRNOG00000020266	Eef2	819.111	828.567	879.295	980.657	899.266	914.63	1065.08	1205.16	1111.78	842.324	931.518	1127.34	No
ENSRNOG00000025909	Uqcc2	23.6215	23.7522	19.5571	26.0564	25.7901	27.3722	31.8307	38.5289	37.7601	22.3103	26.4062	36.0399	No
ENSRNOG00000019578	Rps16	382.236	411.74	425.678	553.447	435.297	390.793	543.911	593.561	593.232	406.551	459.845	576.901	No
ENSRNOG00000004563	Sec24a	6.55169	7.65279	7.32155	5.98394	7.16507	5.9792	4.81645	5.69234	4.90465	7.17535	6.37607	5.13781	No
ENSRNOG00000025359	Spesp1	1.02779	1.46877	1.56204	2.01973	2.16196	1.82344	5.73158	3.3743	3.03949	1.35287	2.00171	4.04846	No
ENSRNOG00000017622	Npm3	20.9862	17.5126	12.9501	21.7664	20.0657	21.8925	29.2471	35.6476	28.1874	17.1496	21.2415	31.0274	No
ENSRNOG00000049575	LOC100911672	0.347184	0.144071	0.381855	1.04963	0.139771	0.198113	1.31262	1.25275	0.566118	0.291037	0.462503	1.04383	No
ENSRNOG00000006327	Rcc2	35.6217	39.3421	34.3687	37.3413	49.7789	40.0817	52.9171	62.5392	49.287	36.4442	42.4006	54.9145	No
ENSRNOG00000024066	Fundc2	14.882	24.0313	18.8119	21.8615	22.11	23.8639	28.6735	30.3431	30.2539	19.2417	22.6118	29.7569	No
ENSRNOG00000029651	Rdh16	4.19775	6.18885	4.60329	7.22245	4.47046	7.77029	9.74174	13.5442	7.01684	4.99663	6.48773	10.1009	No
ENSRNOG00000028505	Rps18	627.772	678.5	631.287	900.007	695.804	677.688	1007.72	955.159	1016.42	645.853	757.833	993.099	No
ENSRNOG00000034180	Rpl37	106.002	80.8509	104.41	135.155	107.521	104.932	181.869	144.633	140.839	97.0874	115.869	155.78	No
ENSRNOG00000051986	Plcg2	7.95831	7.61509	7.75942	7.61687	9.25991	9.19277	10.2086	9.39229	11.7014	7.77761	8.68985	10.4341	No
ENSRNOG00000007546	Asns	114.375	131.77	100.624	121.886	118.907	150.934	186.401	157.719	134.695	115.59	130.576	159.605	No
ENSRNOG00000020674	Rpl27	328.08	339.234	345.784	397.831	340.673	391.912	389.01	485.008	478.496	337.699	376.805	450.838	No
ENSRNOG00000009712	Gale	19.9047	25.6489	17.2228	17.9263	17.9379	16.2925	9.40684	13.5866	15.5189	20.9255	17.3856	12.8375	No
ENSRNOG00000013825	Rap1gap	66.8311	42.3726	74.381	65.7283	80.5402	68.1184	99.8116	81.2915	95.1961	61.1949	71.4623	92.0998	No
ENSRNOG00000008555	Rps20	396.45	453.416	415.515	565.653	431.316	432.257	512.964	605.584	618.649	421.794	476.409	579.066	No
ENSRNOG00000020060	Atf5	21.4267	27.9267	17.0344	25.8175	26.4993	37.3405	70.3693	37.1817	37.5353	22.1293	29.8858	48.3621	No
ENSRNOG00000054011	Tbc1d8b	8.93768	11.2838	10.942	8.71002	9.95426	8.02097	7.0155	6.97739	6.84975	10.3878	8.89509	6.94755	No
ENSRNOG00000006642	Yipf6	29.9289	37.1352	35.3071	31.756	29.7991	27.2573	19.5869	26.563	24.7161	34.1237	29.6041	23.622	No
ENSRNOG00000009723	Ptpmt1	10.0137	11.0301	10.3511	12.4657	12.5782	10.789	13.2229	15.6889	15.2538	10.4649	11.9443	14.7218	No
ENSRNOG00000003174	Tapt1	18.4282	16.3542	16.0256	16.1637	13.0721	12.5083	9.47511	11.9659	9.21112	16.936	13.9147	10.2174	No
ENSRNOG00000018795	Rpl18a	353.065	343.798	363.479	452.816	366.336	422.161	479.391	528.237	582.081	353.447	413.771	529.903	No
ENSRNOG00000016807	Oat	229.351	259.241	232.036	180.559	207.011	227.119	117.134	193.209	168.594	240.209	204.896	159.646	No
ENSRNOG00000027694	LOC100362830	9.85665	10.6857	10.0648	12.168	11.1914	17.2441	14.2075	15.9421	32.9663	10.2024	13.5345	21.0386	No
ENSRNOG00000030807	LOC100912427	7.67438	6.50624	12.7766	35.5924	7.41665	4.88006	50.2301	49.6419	16.889	8.98575	15.963	38.9203	No
ENSRNOG00000001611	Rpl24	505.693	527.96	545.707	635.631	545.847	567.02	664.621	663.355	719.292	526.453	582.833	682.422	No
ENSRNOG00000021638	Eef1d	32.3099	32.7809	30.314	38.0736	36.9954	33.4867	43.7662	47.1234	41.7224	31.8016	36.1852	44.204	No
ENSRNOG00000009378	Rpl4	362.279	407.841	429.44	513.876	437.726	421.34	515.921	592.756	582.271	399.854	457.647	563.649	No
ENSRNOG00000016896	Rpl3	257.294	320.832	309.88	361.332	318.58	320.8	338.625	425.506	436.205	296.002	333.57	400.112	No
ENSRNOG00000042084	Acsm1	0.469955	0.188697	0.396801	0.192947	0.0499269	0.240179	0.0493551	0.0168071	0.0817051	0.351818	0.161018	0.0492891	No
ENSRNOG00000023529	Rpl5	436.537	461.783	473.418	599.728	474.891	507.676	603.502	676.995	681.886	457.246	527.432	654.127	No
ENSRNOG00000036649	Pwwp2b	10.0087	8.87766	11.6122	10.8787	12.4405	11.9435	13.9536	14.3586	15.5712	10.1662	11.7543	14.6278	No
ENSRNOG00000056457	Gpd1	38.9923	48.146	33.2284	17.1212	20.6382	42.33	13.768	15.948	13.7538	40.1222	26.6965	14.4899	No
ENSRNOG00000003756	Lancl3	1.89934	1.8719	0.060138	0.446614	0.121068	0.561612	0.119682	0.0611337	0	1.27712	0.376431	0.0602719	No
ENSRNOG00000004291	Cltc	44.9416	48.4606	45.9305	37.9474	43.638	42.6335	31.1831	37.62	35.9582	46.4442	41.4063	34.9204	No
ENSRNOG00000001049	Tpt1	1252.47	1347.07	1556.73	1619.36	1450.23	1854.64	1929.51	2013.16	2341.67	1385.42	1641.41	2094.78	No
ENSRNOG00000057194	Tars2	7.80614	8.52961	8.34982	9.40578	10.1896	8.89823	13.1846	10.4216	11.4072	8.22852	9.49788	11.6711	No
ENSRNOG00000011893	Rps3a	462.908	476.853	501.092	643.556	508.493	522.96	624.902	721.51	732.962	480.284	558.336	693.125	No
ENSRNOG00000017418	Rps3	418.491	455.307	461.453	606.804	492.183	492.654	573.523	742.914	731.127	445.084	530.547	682.521	No
ENSRNOG00000031315	Rpl36al	31.6361	30.9335	26.028	39.1613	31.6775	34.6188	43.3226	46.6639	45.3698	29.5325	35.1525	45.1188	No
ENSRNOG00000026821	Arhgap42	3.66356	3.58901	5.08446	4.28886	4.97113	5.40555	7.00843	5.48639	6.26103	4.11234	4.88851	6.25195	No
ENSRNOG00000050729	AABR07054265.1	43.3128	57.4634	26.5049	17.6273	38.2273	17.6508	12.2029	11.2601	10.5568	42.427	24.5018	11.3399	No
ENSRNOG00000005261	Fbxl5	26.2562	23.8885	24.4814	21.7348	23.5015	22.0979	19.2305	19.7008	19.3679	24.8754	22.4447	19.4331	No
ENSRNOG00000026962	Osbpl8	5.36378	6.29175	5.69694	4.86015	5.06939	4.86011	3.53569	4.11956	4.17946	5.78416	4.92988	3.9449	No
ENSRNOG00000028743	Gal3st3	2.30871	4.47849	1.74048	2.14196	1.57675	1.62538	0.242463	1.27389	1.27297	2.84256	1.78136	0.929773	No
ENSRNOG00000004526	Cox7a2l	69.4731	66.7466	70.1732	88.8684	69.9545	74.2182	86.7171	94.1548	94.5829	68.7976	77.6804	91.8182	No
ENSRNOG00000006197	Calu	27.2715	25.3291	24.0114	21.6697	23.2951	20.8242	16.9776	18.3859	17.9861	25.5373	21.9297	17.7832	No
ENSRNOG00000057880	Myh11	12.8312	14.3414	15.0025	9.83645	12.6796	15.0019	11.2697	11.0632	9.65722	14.0584	12.506	10.6634	No
ENSRNOG00000011488	Sergef	10.7428	13.5893	11.835	15.9043	13.9779	15.1185	18.5807	20.4259	21.3671	12.0557	15.0002	20.1246	No
ENSRNOG00000031965	Impdh2	19.6612	16.5884	16.7294	23.9926	21.551	17.2148	24.8088	28.6895	25.0999	17.6597	20.9195	26.1994	No
ENSRNOG00000001128	Tesc	249.804	257.925	267.43	300.839	299.418	285.559	328.564	354.935	373.142	258.386	295.272	352.214	No
ENSRNOG00000052620	Gnb2l1	153.331	152.36	169.765	198.309	164.109	170.07	197.036	211.655	209.408	158.485	177.496	206.033	No
ENSRNOG00000006992	Rpl7	90.3939	93.4331	94.3126	118.753	101.227	102.07	121.27	131.28	137.972	92.7132	107.35	130.174	No
ENSRNOG00000021395	LOC100363452	16.582	20.5794	17.3843	24.7563	18.7907	23.0022	26.9345	28.4652	30.9046	18.1819	22.1831	28.7681	No
ENSRNOG00000001300	P2rx4	61.9807	65.0457	71.7903	77.8822	65.1999	79.493	91.0402	89.4012	77.4332	66.2723	74.1917	85.9582	No
ENSRNOG00000020618	Rpl13a	651.586	682.607	697.489	891.667	735.439	754.904	885.955	1017	1025.97	677.227	794.003	976.307	No
ENSRNOG00000037188	LOC100911833	1.59457	2.28168	1.71745	2.3129	2.06686	3.04467	3.09632	3.801	3.82713	1.86457	2.47481	3.57482	No
ENSRNOG00000038436	RGD1307100	5.89381	6.20568	6.12682	5.09376	5.91499	5.6484	5.13108	4.86221	4.83542	6.07543	5.55238	4.9429	No
ENSRNOG00000015221	Eif3f	71.767	73.9965	80.9913	90.4193	79.6235	80.0008	98.0193	92.1655	93.3998	75.5849	83.3478	94.5282	No
ENSRNOG00000006783	Neb	0.0728391	0.0604521	0.0582639	0.0154534	0.0146619	0.0377855	0.00724701	0.00740358	0.00359913	0.0638517	0.0226336	0.00608324	No
ENSRNOG00000021960	AC109958.1	76.972	74.5129	66.6223	59.5755	57.586	76.7921	49.4979	60.0537	57.6664	72.7024	64.6512	55.7393	No
ENSRNOG00000010467	Cpa5	0.0355703	0.0701129	0.101363	0.17923	0.0680202	0.280473	0.941377	0.44651	0.30055	0.0690153	0.175908	0.562812	No
ENSRNOG00000013694	Ntng2	5.28051	5.514	5.2547	4.37119	4.02709	4.70895	3.17884	3.00471	4.04272	5.34974	4.36908	3.40875	No
ENSRNOG00000020595	Rps11	337.814	339.668	355.375	423.055	354.087	380.472	415.805	461.317	453.274	344.286	385.871	443.465	No
ENSRNOG00000003786	Tspan6	44.5119	53.8301	52.26	68.4896	57.1744	54.9629	79.4381	70.3849	75.1174	50.2007	60.209	74.9801	No
ENSRNOG00000028341	Alkbh5	17.1347	14.378	14.9395	13.7229	12.5236	14.1645	11.082	11.7257	11.432	15.4841	13.4703	11.4132	No
ENSRNOG00000048793	LOC684471	15.4985	18.1281	25.3181	25.2301	24.7521	30.8034	47.3275	34.289	35.8164	19.6482	26.9285	39.1443	No
ENSRNOG00000059876	Fsd1l	3.81998	4.31471	4.28084	6.31506	4.51423	4.61117	7.14006	7.08708	5.76226	4.13851	5.14682	6.66313	No
ENSRNOG00000028384	Npepl1	17.1226	19.2202	17.6366	20.6807	21.8558	18.9704	23.0914	24.2467	24.4518	17.9931	20.5023	23.93	No
ENSRNOG00000014179	Rps2	197.548	255.452	260.07	312.917	290.996	270.484	315.084	403.918	384.46	237.69	291.466	367.821	No
ENSRNOG00000038045	Rpl34-ps1	10.4868	8.12062	10.8506	12.2666	13.966	13.6584	24.249	16.455	15.647	9.81935	13.297	18.7837	No
ENSRNOG00000005668	Ndufa8	28.9124	28.1065	28.5858	33.1854	30.8078	36.3394	34.2526	44.5775	41.3443	28.5349	33.4442	40.0581	No
ENSRNOG00000012123	Fdx1	27.1707	31.8103	32.2178	36.294	34.5223	35.4973	41.366	41.2912	43.8269	30.3996	35.4379	42.1613	No
ENSRNOG00000019229	Fbl	12.5258	10.9435	11.7694	14.124	14.3717	13.2801	16.3829	18.1098	16.082	11.7462	13.9252	16.8583	No
ENSRNOG00000021151	Ppp1r14b	57.6703	65.3627	54.3584	68.0643	66.593	71.9264	67.5076	96.8094	80.6931	59.1305	68.8612	81.67	No
ENSRNOG00000011914	Dtnb	18.2863	18.703	19.3824	21.6541	20.1046	22.1321	26.5354	23.2392	23.265	18.7905	21.2969	24.3465	No
ENSRNOG00000010629	Nod1	4.73778	4.05946	4.94117	5.18374	5.78726	5.41303	7.25633	5.80723	6.68101	4.57947	5.46134	6.58152	No
ENSRNOG00000016387	Rpl34	483.16	551.648	534.47	695.645	582.481	565.939	636.658	769.065	774.457	523.093	614.688	726.727	No
ENSRNOG00000048597	Pak2	1.95427	2.28717	6.49711	0.287206	0.778561	3.33069	0.307858	1.10078	0.34401	3.57951	1.46549	0.584216	No
ENSRNOG00000053583	Mapk3	86.0232	88.2319	78.3426	68.3656	68.2125	73.4142	57.7983	54.1047	61.7931	84.1992	69.9974	57.8987	No
ENSRNOG00000013023	Gltscr2	54.074	46.6833	56.7542	72.5473	55.9173	62.8654	83.2035	70.5549	79.7378	52.5038	63.7767	77.8321	No
ENSRNOG00000007061	Arhgef33	0.406216	0.523532	0.356175	0.661281	0.627412	0.831555	1.50627	1.02587	0.997421	0.428641	0.70675	1.17652	No
ENSRNOG00000018487	Slc3a2	181.063	189.804	114.782	187.214	184.176	231.259	245.467	282.421	222.8	161.883	200.883	250.229	No
ENSRNOG00000005698	Ndufa5	53.6009	59.6103	63.0171	77.9253	58.6712	69.5748	67.5506	87.5351	86.7574	58.7428	68.7238	80.6144	No
ENSRNOG00000007748	Tex15	3.00462	3.14525	1.73338	1.73635	1.69611	1.77352	1.2515	1.04905	1.12355	2.62775	1.73532	1.14137	No
ENSRNOG00000026260	Rpl11	62.3267	68.3745	66.5317	83.0339	72.7761	70.9214	91.6777	86.2685	82.9779	65.7443	75.5771	86.9747	No
ENSRNOG00000010515	Trim59	2.22117	1.8195	1.78104	1.27908	1.24115	1.53532	0.927016	0.807772	1.08327	1.94057	1.35185	0.939353	No
ENSRNOG00000009897	Clcnkb	27.5993	28.3351	37.5238	31.9724	42.8984	34.0932	44.9016	36.9793	45.2585	31.1527	36.3213	42.3798	No
ENSRNOG00000010737	Mbnl2	36.3384	39.6359	34.1521	29.9475	30.9694	34.852	27.1636	27.7167	28.4242	36.7088	31.923	27.7681	No
ENSRNOG00000003781	Atp10b	2.05772	2.36782	1.91233	1.4908	1.64842	1.63349	1.68211	1.03107	0.887606	2.11263	1.5909	1.20026	No
ENSRNOG00000005190	Nipal2	26.4965	22.9256	24.409	31.6101	24.4307	29.0891	35.0756	27.7261	35.1467	24.6104	28.3766	32.6495	No
ENSRNOG00000060665	Afap1	6.07842	5.1212	5.7049	4.85902	4.77192	3.82333	3.7464	3.26724	3.73254	5.63484	4.48476	3.58206	No
ENSRNOG00000014856	Etnk1	41.8765	47.8366	47.2882	54.3443	52.4283	53.4182	59.9924	64.8705	61.953	45.6671	53.3969	62.272	No
ENSRNOG00000004741	Rpl19	400.151	473.85	473.445	563.5	479.935	498.551	538.192	621.649	598.75	449.149	513.995	586.197	No
ENSRNOG00000014214	Rpl27a	222.865	234.855	252.151	313.408	263.143	296.611	380.327	337.702	350.14	236.624	291.054	356.056	No
ENSRNOG00000017127	Rpl28	116.052	135.531	125.268	165.848	126.992	146.815	158.464	178.833	173.432	125.617	146.552	170.243	No
ENSRNOG00000052070	Aldh1a3	15.4963	15.5751	14.3831	12.7836	13.1452	11.4785	9.77951	9.58021	11.621	15.1515	12.4691	10.3269	No
ENSRNOG00000007139	Ttpa	2.56482	4.16338	3.18865	3.687	5.30134	4.46111	6.09624	6.62857	5.3116	3.30562	4.48315	6.01214	No
ENSRNOG00000028021	LOC684988	68.4952	83.478	75.8091	95.5273	83.4715	85.7449	92.4869	103.195	110.238	75.9275	88.2479	101.973	No
ENSRNOG00000019106	Rps17	457.264	496.581	509.363	700.764	512.341	557.918	649.607	743.331	733.838	487.736	590.341	708.926	No
ENSRNOG00000055365	Edem1	32.5468	38.4758	39.4672	25.3485	27.8325	36.3814	24.8836	23.8933	24.665	36.83	29.8541	24.4806	No
ENSRNOG00000017960	Deaf1	58.0856	55.8711	60.0828	68.6466	62.0653	66.1731	79.9998	72.4408	68.6613	58.0132	65.6284	73.7006	No
ENSRNOG00000010154	Zc3hc1	32.3531	25.8801	35.1039	23.9448	22.6346	27.9129	23.4942	21.2925	15.5574	31.1124	24.8308	20.1147	No
ENSRNOG00000047247	Ptprs	5.77772	5.08124	4.25397	3.00876	3.4626	4.11435	2.44309	2.3891	2.77703	5.03764	3.52857	2.53641	No
ENSRNOG00000013428	Atp6v0a4	1.20558	1.74588	1.44898	4.26464	2.37598	2.06126	6.99979	2.5183	6.72171	1.46681	2.90063	5.41326	No
ENSRNOG00000003201	LOC100362640	230.18	254.317	267	347.821	281.811	280.875	350.315	369.19	362.538	250.499	303.502	360.681	No
ENSRNOG00000048509	Ubxn6	12.1075	11.4493	11.5723	14.9761	12.478	13.4205	15.6506	15.8066	15.3328	11.7097	13.6248	15.5967	No
ENSRNOG00000001360	Stag3	0.205462	0.0920426	0.301617	0.244701	0.464336	0.515478	0.5826	1.11823	0.613752	0.199707	0.408172	0.771527	No
ENSRNOG00000002609	Ero1lb	40.191	48.3505	47.492	25.8898	31.3896	41.9751	24.9829	25.4034	25.0931	45.3445	33.0848	25.1598	No
ENSRNOG00000003261	Usp9x	11.7866	12.3427	11.2702	9.19602	11.2197	10.7043	8.37233	10.0522	9.46114	11.7998	10.3733	9.29523	No
ENSRNOG00000033734	Tnnt2	50.7947	51.7557	64.5832	73.3835	70.1309	55.671	68.0149	81.2992	81.963	55.7112	66.3951	77.0924	No
ENSRNOG00000005890	Serbp1	88.6929	100.266	86.1187	102.042	103.789	113.287	108.79	136.175	116.504	91.6926	106.373	120.49	No
ENSRNOG00000010747	Dap	63.0248	84.7013	70.9894	63.0068	58.8667	61.0292	51.352	53.8688	52.2805	72.9052	60.9676	52.5004	No
ENSRNOG00000047737	Rpl7a	15.4313	17.1835	15.3241	21.4077	17.437	21.8266	21.7835	28.3497	23.7065	15.9796	20.2238	24.6132	No
ENSRNOG00000000867	Vars	11.6619	11.6058	9.95886	13.0539	12.6214	15.1074	15.7621	16.8362	15.7096	11.0755	13.5942	16.1026	No
ENSRNOG00000010274	Smc4	3.48809	3.71643	3.88637	3.04011	2.66807	2.97337	2.20981	2.6945	2.19494	3.69696	2.89385	2.36642	No
ENSRNOG00000013422	Med23	11.2492	11.12	10.2194	13.007	14.3302	13.0716	17.8915	17.3633	12.9591	10.8628	13.4696	16.0713	No
ENSRNOG00000057072	Slc12a3	0.0365792	0.0540761	0.173729	0.147451	0.297285	0.270401	0.397603	0.600459	0.618148	0.0881281	0.238379	0.538736	No
ENSRNOG00000003687	Rgs2	92.03	72.4515	71.5791	66.2851	65.8849	62.56	51.7212	59.0653	55.6976	78.6869	64.91	55.4947	No
ENSRNOG00000012186	Golph3	105.03	113.489	103.649	100.856	86.6527	91.214	80.499	89.7311	77.6189	107.389	92.9076	82.6163	No
ENSRNOG00000013545	Polr2e	102.207	112.893	113.159	123.703	121.324	132.933	135.931	147.002	140.497	109.42	125.987	141.143	No
ENSRNOG00000003221	Myoc	2.57816	2.69491	4.2671	5.51122	5.41569	3.92717	6.75671	8.82637	5.57437	3.18006	4.95136	7.05248	No
ENSRNOG00000009734	Akr1b8	3.94635	3.41114	3.13404	2.44484	2.65983	2.13611	1.40641	1.7179	2.27763	3.49717	2.41359	1.80065	No
ENSRNOG00000042233	Rpl41	1106.65	1234.23	1132.29	1563.43	1140.95	1393.37	1531.03	1508.16	1628	1157.72	1365.92	1555.73	No
ENSRNOG00000014481	Adtrp	2.26083	1.23136	4.91669	4.49676	3.52693	11.259	6.07332	17.8667	12.9586	2.80296	6.42756	12.2996	No
ENSRNOG00000020308	Ech1	130.5	122.842	103.774	129.659	98.3361	185.217	159.141	158.107	145.857	119.039	137.737	154.368	No
ENSRNOG00000015866	Hint2	60.0398	58.5	47.8279	64.9055	65.2343	71.4158	79.1904	83.9317	70.9712	55.4559	67.1852	78.0311	No
ENSRNOG00000017601	Srd5a1	4.41129	4.89826	4.55335	2.72657	2.61504	4.46384	2.11255	2.75453	2.62292	4.62097	3.26848	2.49666	No
ENSRNOG00000020372	Hdac4	3.30091	3.15464	2.52738	3.74987	3.97863	3.74642	5.46469	4.50097	3.9066	2.99431	3.82497	4.62409	No
ENSRNOG00000020607	Bckdha	68.6172	70.1614	87.2113	86.702	86.9793	87.3344	94.5935	98.3474	98.8271	75.33	87.0052	97.256	No
ENSRNOG00000027767	Slc38a5	1.8586	0.62446	0.762352	0.127705	0.565433	0.291437	0	0.285517	0.118971	1.0818	0.328192	0.134829	No
ENSRNOG00000010567	Angel1	8.48888	7.7724	6.81771	9.75126	9.21794	9.18786	11.29	10.7809	10.5818	7.693	9.38569	10.8842	No
ENSRNOG00000008843	Eci1	39.9418	37.586	43.3812	46.6568	52.5954	45.8646	53.699	51.4493	60.8521	40.303	48.3723	55.3335	No
ENSRNOG00000000583	Cdk19	8.81853	7.51776	8.16614	6.29197	6.92275	7.30002	6.16305	5.89516	5.95262	8.16748	6.83825	6.00361	No
ENSRNOG00000014940	Sfrp5	1.60809	1.03016	2.6731	3.56521	3.22885	4.20019	5.39579	6.28875	7.02018	1.77045	3.66475	6.23491	No
ENSRNOG00000013508	Rpl31	142.869	157.889	163.461	213.852	160.929	178.638	190.071	222.052	217.009	154.74	184.473	209.711	No
ENSRNOG00000016058	Kazald1	28.1494	27.014	35.7763	76.2597	54.6307	26.6273	82.0094	76.9263	75.0706	30.3132	52.5059	78.0021	No
ENSRNOG00000014061	Dusp5	22.5771	23.6844	11.1467	13.2249	14.918	15.2152	13.1537	10.0864	12.2583	19.1361	14.4527	11.8328	No
ENSRNOG00000020288	Slc25a20	18.5014	19.0791	16.5882	22.6011	20.7101	23.8841	28.7047	26.1004	23.4702	18.0562	22.3984	26.0918	No
ENSRNOG00000029886	Hba1	51.9178	60.2391	60.1078	41.7402	96.1184	140.616	76.1228	189.419	123.542	57.4215	92.8248	129.695	No
ENSRNOG00000006916	Sardh	5.69768	7.49355	6.68664	7.8583	8.94326	8.52912	10.7891	10.027	9.14649	6.62596	8.44356	9.98755	No
ENSRNOG00000021174	Macrod1	26.921	23.9821	23.9917	29.9854	29.8633	31.0273	31.5592	35.5127	36.6678	24.9649	30.292	34.5799	No
ENSRNOG00000012609	Trdn	2.98636	6.79616	2.85388	4.17683	1.62669	1.8731	2.73713	1.38066	1.35936	4.21213	2.55888	1.82572	No
ENSRNOG00000014610	Anpep	18.563	14.6932	18.3624	27.8929	18.6024	24.9475	30.263	30.7564	27.9346	17.2062	23.8143	29.6514	No
ENSRNOG00000005287	Syne3	1.90324	1.79866	2.35268	2.41719	3.01631	3.62329	3.64712	3.92731	4.28346	2.01819	3.01893	3.95263	No
ENSRNOG00000008277	Bag1	50.0068	68.5644	48.7199	44.665	38.2273	41.0333	31.6069	32.9981	37.1336	55.7637	41.3086	33.9128	No
ENSRNOG00000001730	Acap2	11.6643	11.6664	10.7919	8.83238	11.0492	8.93711	8.46813	8.02419	9.3051	11.3742	9.60623	8.59914	No
ENSRNOG00000059660	AABR07065531.5	15.3615	5.67734	8.85917	5.11411	4.72104	7.43518	4.92625	2.51634	4.63558	9.966	5.75678	4.02606	No
ENSRNOG00000017123	B2m	802.465	853.504	752.933	850.542	581.842	678.602	581.012	688.441	667.705	802.968	703.662	645.719	No
ENSRNOG00000016193	RGD1562114	23.5529	25.4178	26.5113	30.5001	31.0773	35.6341	40.9619	36.9571	36.5955	25.1607	32.4038	38.1715	No
ENSRNOG00000012346	Epb41l2	7.87343	8.23316	9.07599	6.40136	7.5536	6.41868	5.92827	6.59755	5.2369	8.39419	6.79121	5.92091	No
ENSRNOG00000001255	Mlxip	17.0185	16.947	18.8373	12.3547	14.5467	14.3154	11.7883	12.6751	10.6627	17.6009	13.7389	11.7087	No
ENSRNOG00000002750	Rc3h1	6.5781	5.84159	5.788	3.79603	4.59469	6.34708	4.39809	4.17217	4.29049	6.06923	4.9126	4.28692	No
ENSRNOG00000006803	Dnajc10	28.733	26.0533	23.6612	22.5147	17.1335	25.2179	18.3427	22.3376	16.7146	26.1492	21.622	19.1316	No
ENSRNOG00000010895	Tmem30a	85.9775	98.371	92.688	82.3572	71.4015	80.0834	66.8881	68.914	73.9008	92.3455	77.9474	69.901	No
ENSRNOG00000016469	Fxyd2	565.933	787.458	825.194	902.642	971.093	882.522	908.121	1069.89	1224.99	726.195	918.752	1067.67	No
ENSRNOG00000005826	AABR07065923.1	11.0825	5.39205	13.9916	8.62367	17.9736	20.3254	21.2152	21.6735	18.7018	10.1554	15.6409	20.5302	No
ENSRNOG00000004405	Pigr	288.624	290.762	313.79	347.574	292.84	354.827	358.543	359.802	346.98	297.725	331.747	355.108	No
ENSRNOG00000023385	Rpl37a	265.595	287.158	287.178	389.574	298.589	310.718	341.863	372.856	398.484	279.977	332.96	371.068	No
ENSRNOG00000008987	Rnf139	23.8741	25.2078	26.1921	20.5376	18.1941	20.0288	14.5163	18.5728	17.2858	25.0913	19.5869	16.7916	No
ENSRNOG00000017307	Prss23	122.437	70.7921	84.2533	68.1214	58.2732	77.1145	55.5771	66.2358	46.1777	92.4942	67.8364	55.9969	No
ENSRNOG00000012956	Tgm2	12.0422	13.5091	17.1146	17.8815	16.1588	18.051	18.4529	19.358	21.1123	14.222	17.3638	19.6411	No
ENSRNOG00000009588	Snph	4.46316	3.00521	2.91261	1.5107	2.14998	2.65284	1.11098	1.8423	1.69525	3.46032	2.10451	1.54951	No
ENSRNOG00000012799	Prkaa1	4.3625	4.43436	4.0626	3.43085	3.4187	3.20378	2.91062	3.00654	2.73042	4.28649	3.35111	2.88253	No
ENSRNOG00000004426	Rps27a	288.101	308.702	320.266	442.088	306.63	370.136	535.472	367.371	360.052	305.69	372.952	420.965	No
ENSRNOG00000009094	Nudt4	130.437	112.743	124.445	114.318	98.5863	95.028	84.723	90.881	100.881	122.542	102.644	92.1616	No
ENSRNOG00000051408	Magt1	35.9892	47.3513	41.8712	36.1597	33.1412	33.3324	26.6909	30.4725	33.9561	41.7372	34.2111	30.3732	No
ENSRNOG00000061312	Phf10	19.796	23.0572	17.2792	25.1941	24.4153	29.9144	39.9962	28.6962	25.2062	20.0441	26.5079	31.2995	No
ENSRNOG00000000985	Cpsf4	15.3218	14.5038	14.6866	15.5344	18.6127	23.0426	17.2111	24.9129	24.0908	14.8374	19.0632	22.0716	No
ENSRNOG00000023238	Dgkd	14.969	17.1802	14.4406	10.7842	12.7492	12.6193	11.3589	8.91853	10.9038	15.5299	12.0509	10.3937	No
ENSRNOG00000005935	A3galt2	21.2785	21.384	19.3765	16.6736	17.4216	13.5415	14.9654	11.6081	14.3141	20.6797	15.8789	13.6292	No
ENSRNOG00000047321	Hba2	15.0736	18.5345	14.4545	9.11429	24.8443	51.3628	21.1676	62.3795	35.3115	16.0209	28.4405	39.6195	No
ENSRNOG00000002194	Coq2	31.2915	32.6143	31.947	38.839	35.4722	37.7645	42.1302	38.4321	42.0581	31.9509	37.3586	40.8735	No
ENSRNOG00000004302	Pah	1.22836	0.468624	0.188192	0.239589	0.0757727	0	0	0.0765232	0.0372005	0.628391	0.105121	0.0379079	No
ENSRNOG00000045738	Ak4	0.546082	0.615078	0.963323	1.25786	1.79016	1.69159	2.58075	1.95855	2.92958	0.708161	1.57987	2.48963	No
ENSRNOG00000003721	Paqr4	5.77287	6.05468	5.74289	4.16667	5.03482	4.70955	3.50245	4.51972	4.17466	5.85681	4.63701	4.06561	No
ENSRNOG00000024190	Rasef	62.0581	71.1294	59.0411	54.6228	51.8252	53.5851	53.7066	42.6672	47.9678	64.0762	53.3444	48.1139	No
ENSRNOG00000029394	Dusp8	5.62998	2.89495	2.5964	2.67236	2.34045	1.52801	1.65811	1.9303	1.26394	3.70711	2.18027	1.61745	No
ENSRNOG00000009339	Cenpe	0.230831	0.196474	0.219262	0.063442	0.0601926	0.0723908	0.0198344	0.0709203	0.00985049	0.215523	0.0653418	0.0335351	No
ENSRNOG00000056672	AABR07027390.2	3.4858	3.64365	3.41142	7.13208	5.45383	3.85215	8.08706	6.11983	6.84263	3.51362	5.47935	7.01651	No
ENSRNOG00000028436	Rprml	2.06867	3.29342	0.831341	0.721629	0.53252	0.548946	0.300812	0.384139	0.224091	2.06448	0.601031	0.303014	No
ENSRNOG00000022267	Pabpc1l2a	28.7661	19.4832	27.2039	28.4782	42.4075	34.9725	42.7603	50.7812	33.6688	25.1511	35.2861	42.4034	No
ENSRNOG00000018273	Ncl	68.3796	71.0544	66.0703	81.0188	77.2838	84.2767	90.332	95.2141	79.6063	68.5014	80.8598	88.3841	No
ENSRNOG00000001953	Bace2	44.4334	36.3073	39.9737	48.6042	47.4114	48.9184	57.3359	51.4601	51.009	40.2381	48.3113	53.2683	No
ENSRNOG00000020354	Mrpl23	30.504	40.2791	41.6342	55.8104	41.9085	44.5147	51.9256	57.337	51.4373	37.4724	47.4112	53.5666	No
ENSRNOG00000050636	Arhgef10l	21.8169	22.446	19.7565	16.756	18.4171	16.3095	13.8103	15.5734	16.6032	21.3398	17.1609	15.329	No
ENSRNOG00000015756	Nphp1	5.17446	7.46116	6.22259	9.29889	7.87212	8.56717	10.6249	9.59918	9.9791	6.28607	8.5794	10.0677	No
ENSRNOG00000011921	Dusp4	17.9995	20.8711	21.3383	16.6393	38.0735	48.5643	51.2478	36.0426	48.3163	20.0696	34.4257	45.2022	No
ENSRNOG00000030763	Dpp4	13.8393	13.5745	18.2821	19.3794	17.7739	19.5534	24.3127	20.6004	18.2546	15.232	18.9022	21.0559	No
ENSRNOG00000003300	Btg2	22.659	11.5042	12.5405	9.68744	10.3253	9.04411	5.36901	8.31791	9.2886	15.5679	9.6856	7.6585	No
ENSRNOG00000037673	RGD1565183	3.44664	3.05716	3.60128	4.8627	2.63637	19.1937	7.49276	23.2967	12.296	3.36836	8.89758	14.3618	No
ENSRNOG00000008469	Mettl5	5.91764	8.45661	8.57209	11.2561	9.76017	10.7174	13.284	11.6425	12.2919	7.64878	10.5779	12.4061	No
ENSRNOG00000015415	Rhoq	49.5023	57.3438	52.9063	47.6517	43.2695	44.7675	38.1715	42.6176	44.451	53.2508	45.2296	41.7467	No
ENSRNOG00000042717	Ciart	0.184138	0.136109	0.0874546	0.510305	0.5722	0.362984	1.26183	1.02238	0.388967	0.135901	0.48183	0.891058	No
ENSRNOG00000020179	Nt5c2	23.743	21.6517	21.5593	18.2891	16.0476	18.56	15.9069	16.7776	14.5188	22.318	17.6322	15.7344	No
ENSRNOG00000023546	Hspb1	48.9415	40.0759	45.2788	27.7774	32.3562	47.9692	32.0717	29.0752	36.2969	44.7654	36.0343	32.4813	No
ENSRNOG00000057713	Cav2	29.2583	41.7325	32.4035	23.4261	28.1594	24.8766	21.2728	17.3859	27.5289	34.4648	25.4874	22.0625	No
ENSRNOG00000007060	Plin2	15.5625	19.1933	12.3732	13.3437	10.7283	11.5253	9.50834	10.2534	11.3817	15.7097	11.8658	10.3811	No
ENSRNOG00000006508	Thnsl2	4.10628	4.96079	3.77465	7.20832	5.5304	7.31119	10.0995	6.56578	8.1247	4.28057	6.6833	8.26332	No
ENSRNOG00000020743	Cyp2s1	5.52929	5.38953	4.55957	7.77652	6.97155	6.73743	9.70583	7.24595	8.15737	5.15946	7.16183	8.36972	No
ENSRNOG00000016220	Rpl12	243.297	319.665	315.094	380.77	326.302	508.787	403.046	611.239	404.433	292.686	405.286	472.906	No
ENSRNOG00000029726	Gstm1	19.489	32.4831	16.3343	21.5896	13.496	12.1468	15.0346	12.5919	12.1082	22.7688	15.7441	13.2449	No
ENSRNOG00000011951	Plk2	8.0192	7.87502	7.9176	5.64826	6.84299	5.89256	5.48777	5.27328	5.5318	7.93727	6.12794	5.43095	No
ENSRNOG00000014705	Rbm20	0.813741	0.766604	1.12533	1.39891	1.40735	1.41538	1.79843	1.47907	1.90991	0.901893	1.40721	1.72913	No
ENSRNOG00000009963	Ctps1	12.391	17.3369	12.3062	16.7093	17.615	19.0662	19.9129	21.4047	18.1609	14.0114	17.7968	19.8262	No
ENSRNOG00000031855	Actr3b	2.20144	2.16964	1.61892	0.572518	1.15429	0.629944	0.671218	0.342859	0.533361	1.99667	0.785583	0.515813	No
ENSRNOG00000011155	AABR07072207.1	13.5833	12.8819	16.3107	25.5692	16.6632	18.4402	23.7396	25.7373	21.4144	14.2586	20.2242	23.6304	No
ENSRNOG00000008451	Fut8	14.5951	11.29	11.6605	10.2046	9.19511	9.64601	8.90267	8.41219	8.60378	12.5152	9.6819	8.63955	No
ENSRNOG00000025604	Atad2	3.22021	3.2884	3.48262	2.32636	2.31849	2.06497	2.10859	2.11668	1.40234	3.33041	2.23661	1.87587	No
ENSRNOG00000010103	Eif4b	54.745	53.3714	60.6982	68.7983	63.7061	67.5137	76.8412	72.1836	66.5106	56.2715	66.6727	71.8451	No
ENSRNOG00000015859	Chdh	6.43454	10.1141	6.80355	10.2946	10.5757	9.65198	11.1204	11.7689	11.4204	7.78407	10.1741	11.4366	No
ENSRNOG00000026542	Suco	6.08799	6.4374	5.65113	4.76559	4.60107	4.64731	4.15515	4.1244	4.23135	6.05884	4.67132	4.1703	No
ENSRNOG00000025581	Vwa2	9.08612	8.54409	9.22458	12.1807	9.86319	11.7696	10.4396	12.5567	14.3802	8.9516	11.2712	12.4589	No
ENSRNOG00000028747	AABR07073039.1	7.91291	10.4665	11.4723	15.9485	13.7379	18.8823	26.374	17.0912	16.4217	9.95057	16.1896	19.9623	No
ENSRNOG00000019737	Sema4a	16.0493	14.0418	19.9963	25.5626	22.712	16.5196	27.0902	21.884	23.3914	16.6958	21.5981	24.1218	No
ENSRNOG00000055562	Dkc1	20.2943	20.3604	18.7	22.9826	22.9287	26.0314	26.8777	24.2118	26.887	19.7849	23.9809	25.9922	No
ENSRNOG00000017447	Eif2s2	68.3079	95.6234	62.4478	94.2931	87.6509	110.47	111.893	116.087	97.1102	75.4597	97.4714	108.363	No
ENSRNOG00000029134	Adgrl1	2.0208	0.981974	1.61293	0.707107	1.01975	1.02354	0.623415	0.704637	0.895894	1.53857	0.916801	0.741315	No
ENSRNOG00000006949	C1qbp	55.0015	63.2777	58.5394	73.5328	71.8786	69.4512	80.1723	79.0604	72.9277	58.9395	71.6209	77.3868	No
ENSRNOG00000002947	Dpt	5.38133	5.75178	5.21961	7.75266	8.33392	7.99335	8.52504	10.2095	9.28599	5.45091	8.02664	9.34019	No
ENSRNOG00000014365	Gne	68.4098	45.4064	49.5354	43.8635	40.9102	43.1704	33.8437	43.1657	39.3472	54.4505	42.648	38.7855	No
ENSRNOG00000012495	Podxl	8.57584	8.32806	5.67833	4.91233	6.12973	5.20372	4.23771	5.19242	4.86484	7.52741	5.41526	4.76499	No
ENSRNOG00000048232	Olr1748	33.516	34.2055	34.9875	48.5206	52.3796	35.9689	56.3627	40.8237	55.8238	34.2363	45.623	51.0034	No
ENSRNOG00000019922	Ntpcr	12.6338	16.0089	14.7585	18.6627	19.7327	19.2585	23.6602	21.7466	18.9334	14.4671	19.218	21.4467	No
ENSRNOG00000001792	Slc12a8	29.5302	34.1384	30.5356	41.6565	38.4805	34.97	41.1902	41.4785	41.2932	31.4014	38.369	41.3206	No
ENSRNOG00000018796	Herpud1	126.151	145.035	169.475	162.826	224.176	180.046	192.025	243.498	186.658	146.887	189.016	207.394	No
ENSRNOG00000002013	Sidt1	33.3405	30.4642	31.1581	26.2114	24.6841	30.0719	27.4287	25.8084	23.1615	31.6543	26.9891	25.4662	No
ENSRNOG00000001250	Lfng	8.00743	8.33428	6.43319	5.54307	4.4363	4.72066	3.89036	4.44411	4.21548	7.59163	4.90001	4.18332	No
ENSRNOG00000008944	Ext2	13.707	13.9748	12.9408	17.96	16.8275	16.3052	18.448	18.2828	18.7154	13.5408	17.0309	18.4821	No
ENSRNOG00000017864	Bdp1	4.08392	5.57073	5.5846	3.877	3.76331	4.28775	3.44982	3.5434	3.94524	5.07975	3.97602	3.64615	No
ENSRNOG00000009582	Rpe65	2.08564	2.45927	3.71458	0.938308	1.56684	1.54175	1.33768	1.07888	0.734272	2.75317	1.34897	1.05028	No
ENSRNOG00000013040	Ddx31	2.25381	2.06937	1.61021	2.58188	3.44424	3.07581	3.13168	3.94337	3.49039	1.9778	3.03398	3.52181	No
ENSRNOG00000010260	Dixdc1	9.56592	10.0712	9.84144	7.95235	8.37283	7.8757	7.80743	7.83905	6.98207	9.82618	8.06696	7.54285	No
ENSRNOG00000002714	Mettl22	7.6684	7.15377	6.50561	12.2112	8.95516	9.92374	12.7809	9.60909	12.8598	7.10926	10.3634	11.75	No
ENSRNOG00000013737	Bcar3	2.30038	3.14094	5.03024	4.1776	5.81944	8.0537	7.22497	7.12654	7.28885	3.49052	6.01692	7.21345	No
ENSRNOG00000026371	Krt17	8.62789	8.1616	7.35396	6.17173	5.45052	4.63159	5.09686	4.76066	4.44783	8.04782	5.41795	4.76845	No
ENSRNOG00000015201	RGD1562084	0.565926	0.426515	0.72729	1.94577	1.9416	0.689039	2.42281	2.37872	1.46891	0.573244	1.52547	2.09015	No
ENSRNOG00000003094	Cmah	369.573	371.959	334.52	86.9226	132.833	238.849	117.311	138.593	93.2982	358.684	152.868	116.401	No
ENSRNOG00000034272	Pias1	7.82158	7.81615	8.84637	6.5624	5.07843	6.56177	4.98588	5.72591	5.8745	8.16137	6.06753	5.52876	No
ENSRNOG00000032922	Dclk1	0.518504	0.492543	0.759543	0.805819	1.1946	0.806601	1.0274	1.17628	1.03809	0.590197	0.935675	1.08059	No
ENSRNOG00000011138	Rpl29	293.448	363.387	392.672	529.666	394.166	459.492	471.35	500.284	534.193	349.836	461.108	501.942	No
ENSRNOG00000000321	Cd24	844.366	1023.85	934.535	875.749	758.707	730.365	715.668	733.722	795.927	934.25	788.274	748.439	No
ENSRNOG00000004290	Grb10	5.97303	7.54711	4.98991	7.87143	8.53727	10.3856	13.0284	9.06548	7.89385	6.17002	8.93144	9.9959	No
ENSRNOG00000036852	Pcbp2	58.2522	56.7531	56.1614	66.0999	70.1243	65.5594	76.0157	68.6383	67.4575	57.0556	67.2612	70.7039	No
ENSRNOG00000027079	Impad1	3.37591	0.193439	0.447448	0.316473	0.262731	0.116072	0.0742063	0.189524	0.147414	1.33893	0.231759	0.137048	No
ENSRNOG00000004276	Itga3	8.78328	7.80521	6.563	4.23683	6.01416	6.00694	4.80552	4.75199	5.09446	7.71716	5.41931	4.88399	No
ENSRNOG00000003228	Mid1ip1	12.8699	8.27576	7.49523	13.3949	13.0316	13.5583	15.6742	14.9127	13.3899	9.54696	13.3283	14.6589	No
ENSRNOG00000013061	Tusc3	33.4246	36.8876	32.5868	46.9351	41.3705	38.9177	47.7013	44.9014	42.5527	34.2997	42.4078	45.0518	No
ENSRNOG00000019093	Nrg2	4.34331	2.99392	3.19557	2.32764	1.60831	2.77144	2.25432	2.25454	1.39063	3.51093	2.2358	1.9665	No
ENSRNOG00000009614	LOC300249	13.5593	15.1744	16.0094	21.0713	17.8111	22.2325	24.2548	21.169	21.3553	14.9144	20.3717	22.2597	No
ENSRNOG00000021298	Dstyk	9.99199	9.93787	10.808	7.15668	8.2407	8.39176	7.4788	7.38779	7.25658	10.246	7.92971	7.37439	No
ENSRNOG00000034025	Ptprj	12.625	11.3105	11.2952	9.66811	8.817	9.80182	9.57054	8.60649	8.40775	11.7436	9.42898	8.86159	No
ENSRNOG00000027240	Kndc1	0.0306368	0.0150971	0.0727532	0.231557	0.351516	0.0905896	0.608108	0.133124	0.359534	0.0394957	0.224554	0.366922	No
ENSRNOG00000024603	Rps15	722.411	864.592	897.692	1182.01	931.583	1047.13	1167.64	1075.65	1137.75	828.232	1053.57	1127.02	No
ENSRNOG00000009997	Erap1	10.0926	10.5734	9.73774	8.76134	7.75032	7.83273	7.40618	8.39493	7.11761	10.1346	8.1148	7.63957	No
ENSRNOG00000008810	Nsmf	7.64039	4.32228	5.89504	4.58641	3.05924	4.02356	3.44134	3.35588	3.59945	5.95257	3.88974	3.46556	No
ENSRNOG00000004616	Npm1	70.2349	69.6627	68.8469	85.8099	78.2194	82.3529	87.3662	90.506	79.7069	69.5815	82.1274	85.8597	No
ENSRNOG00000054724	Pycrl	39.5177	34.5955	47.6333	52.6776	50.0838	52.3808	60.793	50.843	53.7315	40.5822	51.7141	55.1225	No
ENSRNOG00000034228	Pik3c2g	1.27585	2.67366	1.99007	2.67975	3.44136	3.29601	4.27782	3.34576	3.00081	1.97986	3.13904	3.54146	No
ENSRNOG00000015420	Stxbp1	9.57152	9.01836	8.60774	6.96635	6.80021	7.55591	6.19878	6.46107	7.38434	9.06587	7.10749	6.6814	No
ENSRNOG00000017428	Map1b	2.43269	2.66984	1.86269	1.19521	1.59791	2.11877	1.71973	1.35996	1.41714	2.32174	1.6373	1.49895	No
ENSRNOG00000000610	Cisd1	56.7544	59.7285	57.671	71.2712	68.988	84.3418	71.5247	81.6726	86.2228	58.0513	74.867	79.8067	No
ENSRNOG00000024213	Golim4	34.1447	32.7911	42.6917	45.9444	42.2309	52.6482	51.9855	50.0488	47.9019	36.5425	46.9412	49.9787	No
ENSRNOG00000043866	AY172581.24	51.0006	46.5016	70.1043	58.218	65.0668	105.452	78.9467	80.4065	87.8293	55.8688	76.2455	82.3942	No
ENSRNOG00000026716	Rpl9	187.22	221.697	214.875	316.05	240.258	242.329	257.036	303.371	287.779	207.931	266.212	282.728	No
ENSRNOG00000028805	RGD1564114	3.52841	4.78712	4.09152	7.38859	7.53593	5.32947	9.35535	6.99111	6.45306	4.13569	6.75133	7.59984	No
ENSRNOG00000014078	Ndufb8	69.5273	77.1301	71.9681	93.8407	80.901	97.0349	87.9076	94.5161	103.395	72.8752	90.5922	95.273	No
ENSRNOG00000014076	Mbnl1	14.0851	15.8096	14.0295	9.06854	10.8486	12.3401	10.9555	9.16153	9.91759	14.6414	10.7524	10.0115	No
ENSRNOG00000020994	Slc25a39	77.8592	96.368	84.1543	102.554	101.111	109.629	110.204	108.31	109.047	86.1272	104.431	109.187	No
ENSRNOG00000019630	Hacl1	3.37578	2.20448	1.59026	1.39673	1.50889	1.52838	1.31002	1.27207	1.39139	2.39017	1.478	1.32449	No
ENSRNOG00000060775	Lmo7	11.4011	9.93058	11.2688	12.1727	14.628	13.3481	13.0188	14.0737	14.9707	10.8668	13.3829	14.0211	No
ENSRNOG00000015517	Zfp444	5.97348	7.60075	6.6552	5.04829	5.18476	4.49632	5.07657	4.10578	4.55757	6.74315	4.90979	4.57997	No
ENSRNOG00000010951	Cmtm6	30.4711	28.6747	26.3763	23.9963	22.5323	21.1201	18.9064	22.7317	22.6319	28.5073	22.5496	21.4233	No
ENSRNOG00000016467	Kctd1	18.1552	17.0201	18.972	22.6879	21.6596	21.7074	21.9402	23.6744	23.2804	18.0491	22.0183	22.965	No
ENSRNOG00000049151	Csap1	7227.96	5603.4	3059.62	2783.93	978.729	1410.71	1031.53	1028.51	2033.55	5296.99	1724.46	1364.53	No
ENSRNOG00000017494	Acp6	15.6294	12.8695	16.8096	22.254	21.1142	17.3925	24.0176	20.0576	20.448	15.1028	20.2536	21.5077	No
ENSRNOG00000000490	Rps10	477.709	540.293	478.104	741.7	605.389	531.86	683.788	645.923	638.827	498.702	626.316	656.179	No
ENSRNOG00000004978	Prkacb	18.9571	22.9678	29.8537	27.2915	33.1849	41.5138	35.1625	39.2941	35.1266	23.9262	33.9967	36.5277	No
ENSRNOG00000003350	Mospd2	12.7152	10.3555	11.901	8.4174	9.23255	8.80943	8.29711	8.65616	8.0415	11.6572	8.81979	8.33159	No
ENSRNOG00000033051	Slc22a15	8.03639	6.26635	7.67851	5.3356	5.53692	5.12529	5.40649	4.45058	5.14821	7.32708	5.3326	5.00176	No
ENSRNOG00000000245	Slc16a6	2.71486	2.33341	2.36889	2.9904	3.8333	4.97831	4.92323	4.35898	3.67499	2.47238	3.93401	4.31907	No
ENSRNOG00000046349	LOC100360604	66.7178	50.58	40.8864	97.5991	72.814	64.9432	90.7575	81.0485	81.5985	52.7281	78.4521	84.4682	No
ENSRNOG00000007335	Ccl11	0.632736	1.63694	3.45588	7.25316	4.91548	3.81982	5.68152	7.56081	5.7918	1.90852	5.32949	6.34471	No
ENSRNOG00000048812	Gpx1	240.894	280.924	253.094	329.527	306.169	301.529	293.313	322.91	351.533	258.304	312.409	322.585	No
ENSRNOG00000015642	Pabpc4	76.4708	96.8259	78.1652	96.3526	104.214	110.869	112.254	108.647	100.631	83.8206	103.812	107.177	No
ENSRNOG00000039390	Slc37a2	14.274	11.3532	6.71347	38.7722	17.7224	19.3959	36.889	31.1457	17.8407	10.7802	25.2968	28.6251	No
ENSRNOG00000011542	Apopt1	0	0.142122	0	0.0726617	0	2.27413	3.13493	0.278492	0.0676922	0.0473741	0.782265	1.16037	No
ENSRNOG00000008134	Mefv	1.99226	1.42798	1.78488	2.14459	2.27286	4.90907	3.59493	3.49771	2.91186	1.73504	3.10884	3.33483	No
ENSRNOG00000028137	Mki67	1.26256	1.79469	2.10643	1.2071	0.920861	1.22048	1.07861	0.953426	1.14733	1.72123	1.11615	1.05979	No
ENSRNOG00000019180	Acsl4	6.25032	5.65067	6.8882	4.41076	3.90689	5.30089	3.61791	4.8813	4.60947	6.26306	4.53952	4.36956	No
ENSRNOG00000057756	Osbpl2	40.9669	40.8682	37.8514	30.1329	34.6958	33.6195	31.795	30.0947	34.3164	39.8955	32.8161	32.0687	No
ENSRNOG00000001756	LOC100911374	0.139185	0.137175	0.132209	0.0701322	0.0665402	2.88089	0.263113	2.15038	1.37205	0.13619	1.00585	1.26185	No
ENSRNOG00000061786	Rn60_18_0774.1	0.417556	0	0.0991571	2.41956	0.798482	1.852	2.36801	2.41917	1.66606	0.172238	1.69001	2.15108	No
ENSRNOG00000005247	LOC100912008	0.325711	0.160503	0.541426	12.3909	0.311424	0	0.461787	6.3688	9.09715	0.342547	4.23411	5.30925	No
ENSRNOG00000034290	Ccl21	3.73029	3.01653	3.45247	7.80757	4.02393	8.57892	6.50921	7.29634	7.72258	3.39976	6.80347	7.17604	No
ENSRNOG00000007939	Naprt1	22.3335	18.3555	16.441	25.4406	23.4512	28.2626	27.2537	25.4549	25.9845	19.0433	25.7181	26.2311	No
ENSRNOG00000015003	Pex11a	34.2596	29.0287	15.6637	8.53548	3.20627	19.4221	8.65908	12.9521	7.72452	26.3173	10.388	9.77857	No
ENSRNOG00000009899	Skil	10.185	8.66626	8.41266	5.41888	7.34908	6.14167	7.11544	6.04745	5.4343	9.08799	6.30321	6.19906	No
ENSRNOG00000004621	Rtn4	19.4801	15.4876	15.2767	13.8126	11.873	12.4207	11.2942	12.734	13.6692	16.7481	12.7021	12.5658	No
ENSRNOG00000012881	Fgl2	26.4877	24.6298	24.1504	20.0471	22.4427	14.8389	16.465	18.8736	21.568	25.0893	19.1096	18.9689	No
